# Supplementary material for: Conflicting Biomedical Assumptions for Mathematical Modeling: The Case of Cancer Metastasis
Source: PLoS Comput Biol. 2011 Oct 6;7(10):e1002132. doi: 10.1371/journal.pcbi.1002132 (PMC3188482; doi:10.1371/journal.pcbi.1002132)
Supplement: Dataset S1 — Excel file with all the data on the topics discussed in this paper. (XLS) [file pcbi.1002132.s001.xls]

## Sheet: info
A = agree
M= maybe
D = disagree
Main categories are highlighted with color. However not always the numbers under the category are adding up. This is because if the same expert commented in 2 or more topics in a group, is only concidered once in the total count.
We have:
15 PhDs, 7 MDs, and 6 MD/PhDs
19 men and 9 women
16 interviewed in person and 12 interviewed over the phone
9 received their first doctorate degree up to 1986, 11 from 1986 to 1995, and 8 after 1995
In total: 28 experts
Expert Groups:
i. PhD, MD (or equivalent), MD/PhD
PhD:	2	9	10	11	12	15	16	18	19	20	22	24	25	26	28
MD:	1	5	6	7	8	14	17
MD/PhD:	3	4	13	21	23	27
ii. Men, Women
M:	1	2	3	4	5	6	8	9	10	13	16	17	18	20	21	22	24	26	27
W:	7	11	12	14	15	19	23	25	28
iii. UChicago / in person, Elsewhere / over the phone
in person:	1	3	4	5	6	7	8	9	10	11	12	13	14	15	16	17
over the phone:	2	18	19	20	21	22	23	24	25	26	27	28
iv. Year of first medical or doctorate degree (ie years of experience as expert)
before 70:	21
71-75:	10
76-80:	14	22
81-85:	8	16	20	27	28
86-90:	5	7	9	12	24	26
91-95:	6	13	15	18	23
96-00:	1	2	3	4	11	17	19	25

## Sheet: definition_all
idea	A_all	M_all	D_all	idea	A_phd	M_phd	D_phd	A_md	M_md	D_md	A_mdphd	M_mdphd	D_mdphd	idea	A_men	M_men	D_men	A_women	M_women	D_women	idea	A_upto86	M_upto86	D_upto86	A_from86to95	M_from86to95	D_from86to95	A_after95	M_after95	D_after95	idea	A_phone	M_phone	D_phone	A_inperson	M_inperson	D_inperson
METASTASIS IS THE SPREAD	15	0	1	METASTASIS IS THE SPREAD	8	0	1	2	0	0	5	0	0	METASTASIS IS THE SPREAD	9	0	0	6	0	1	METASTASIS IS THE SPREAD	7	0	0	4	0	0	4	0	1	METASTASIS IS THE SPREAD	8	0	1	7	0	0
the spread of a tumor from its primary site of origin to distant parts of the body	2	0	0	the spread of a tumor from its primary site of origin to distant parts of the body	0	0	0	0	0	0	2	0	0	the spread of a tumor from its primary site of origin to distant parts of the body	2	0	0	0	0	0	the spread of a tumor from its primary site of origin to distant parts of the body	1	0	0	0	0	0	1	0	0	the spread of a tumor from its primary site of origin to distant parts of the body	1	0	0	1	0	0
the spread of cancer cells beyond their primary tissue of origin / primary cells leave the primary tumor and go to other sites / from where it started to some other spot in the body	6	0	0	the spread of cancer cells beyond their primary tissue of origin / primary cells leave the primary tumor and go to other sites / from where it started to some other spot in the body	3	0	0	2	0	0	1	0	0	the spread of cancer cells beyond their primary tissue of origin / primary cells leave the primary tumor and go to other sites / from where it started to some other spot in the body	4	0	0	2	0	0	the spread of cancer cells beyond their primary tissue of origin / primary cells leave the primary tumor and go to other sites / from where it started to some other spot in the body	2	0	0	2	0	0	2	0	0	the spread of cancer cells beyond their primary tissue of origin / primary cells leave the primary tumor and go to other sites / from where it started to some other spot in the body	2	0	0	4	0	0
the movement of cells away from the primary tumor to a secondary location, and colonization at that secondary location / the movement of tumor cells from a primary site to result in their growth at a distant site	3	0	0	the movement of cells away from the primary tumor to a secondary location, and colonization at that secondary location / the movement of tumor cells from a primary site to result in their growth at a distant site	3	0	0	0	0	0	0	0	0	the movement of cells away from the primary tumor to a secondary location, and colonization at that secondary location / the movement of tumor cells from a primary site to result in their growth at a distant site	1	0	0	2	0	0	the movement of cells away from the primary tumor to a secondary location, and colonization at that secondary location / the movement of tumor cells from a primary site to result in their growth at a distant site	2	0	0	0	0	0	1	0	0	the movement of cells away from the primary tumor to a secondary location, and colonization at that secondary location / the movement of tumor cells from a primary site to result in their growth at a distant site	3	0	0	0	0	0
in a very simple term is the movement of a cancer cell from one site to another site	1	0	0	in a very simple term is the movement of a cancer cell from one site to another site	1	0	0	0	0	0	0	0	0	in a very simple term is the movement of a cancer cell from one site to another site	0	0	0	1	0	0	in a very simple term is the movement of a cancer cell from one site to another site	0	0	0	1	0	0	0	0	0	in a very simple term is the movement of a cancer cell from one site to another site	0	0	0	1	0	0
it’s from one primary site to a discontinuous secondary site / the viability of cells from the primary tumor in a situation completely separate from the primary tumor, not of direct extension	2	0	0	it’s from one primary site to a discontinuous secondary site / the viability of cells from the primary tumor in a situation completely separate from the primary tumor, not of direct extension	1	0	0	0	0	0	1	0	0	it’s from one primary site to a discontinuous secondary site / the viability of cells from the primary tumor in a situation completely separate from the primary tumor, not of direct extension	0	0	0	2	0	0	it’s from one primary site to a discontinuous secondary site / the viability of cells from the primary tumor in a situation completely separate from the primary tumor, not of direct extension	0	0	0	2	0	0	0	0	0	it’s from one primary site to a discontinuous secondary site / the viability of cells from the primary tumor in a situation completely separate from the primary tumor, not of direct extension	1	0	0	1	0	0
when cancer is growing where it shouldn’t be growing, so in parts of the body distant from where it’s began	1	0	0	when cancer is growing where it shouldn’t be growing, so in parts of the body distant from where it’s began	0	0	0	0	0	0	1	0	0	when cancer is growing where it shouldn’t be growing, so in parts of the body distant from where it’s began	1	0	0	0	0	0	when cancer is growing where it shouldn’t be growing, so in parts of the body distant from where it’s began	1	0	0	0	0	0	0	0	0	when cancer is growing where it shouldn’t be growing, so in parts of the body distant from where it’s began	1	0	0	0	0	0
metastasis is the spread of the tumor	1	0	0	metastasis is the spread of the tumor	1	0	0	0	0	0	0	0	0	metastasis is the spread of the tumor	1	0	0	0	0	0	metastasis is the spread of the tumor	1	0	0	0	0	0	0	0	0	metastasis is the spread of the tumor	0	0	0	1	0	0
seeding of a few cells in another organ	0	0	1	seeding of a few cells in another organ	0	0	1	0	0	0	0	0	0	seeding of a few cells in another organ	0	0	0	0	0	1	seeding of a few cells in another organ	0	0	0	0	0	0	0	0	1	seeding of a few cells in another organ	0	0	1	0	0	0
DISTANT VS REGIONAL	5	0	0	DISTANT VS REGIONAL	2	0	0	0	0	0	3	0	0	DISTANT VS REGIONAL	3	0	0	2	0	0	DISTANT VS REGIONAL	2	0	0	1	0	0	2	0	0	DISTANT VS REGIONAL	3	0	0	2	0	0
people refer to metastasis as distant metastasis	1	0	0	people refer to metastasis as distant metastasis	0	0	0	0	0	0	1	0	0	people refer to metastasis as distant metastasis	1	0	0	0	0	0	people refer to metastasis as distant metastasis	0	0	0	0	0	0	1	0	0	people refer to metastasis as distant metastasis	0	0	0	1	0	0
I prefer to think of metastasis as translocation of the tumor to a distant site	1	0	0	I prefer to think of metastasis as translocation of the tumor to a distant site	1	0	0	0	0	0	0	0	0	I prefer to think of metastasis as translocation of the tumor to a distant site	0	0	0	1	0	0	I prefer to think of metastasis as translocation of the tumor to a distant site	0	0	0	0	0	0	1	0	0	I prefer to think of metastasis as translocation of the tumor to a distant site	0	0	0	1	0	0
can also be referred to as what we call regional spread / can either be a sort of local invasion / short-range metastasis / direct extension	5	0	0	can also be referred to as what we call regional spread / can either be a sort of local invasion / short-range metastasis / direct extension	2	0	0	0	0	0	3	0	0	can also be referred to as what we call regional spread / can either be a sort of local invasion / short-range metastasis / direct extension	3	0	0	2	0	0	can also be referred to as what we call regional spread / can either be a sort of local invasion / short-range metastasis / direct extension	2	0	0	1	0	0	2	0	0	can also be referred to as what we call regional spread / can either be a sort of local invasion / short-range metastasis / direct extension	3	0	0	2	0	0
THE DIFFERENCE BETWEEN SPREAD & SECONDARY TUMOR	9	0	0	THE DIFFERENCE BETWEEN SPREAD & SECONDARY TUMOR	4	0	0	3	0	0	2	0	0	THE DIFFERENCE BETWEEN SPREAD & SECONDARY TUMOR	6	0	0	3	0	0	THE DIFFERENCE BETWEEN SPREAD & SECONDARY TUMOR	1	0	0	5	0	0	3	0	0	THE DIFFERENCE BETWEEN SPREAD & SECONDARY TUMOR	2	0	0	7	0	0
metastatic also used to mean it’s somewhere else besides the primary location	3	0	0	metastatic also used to mean it’s somewhere else besides the primary location	0	0	0	2	0	0	1	0	0	metastatic also used to mean it’s somewhere else besides the primary location	3	0	0	0	0	0	metastatic also used to mean it’s somewhere else besides the primary location	0	0	0	1	0	0	2	0	0	metastatic also used to mean it’s somewhere else besides the primary location	0	0	0	3	0	0
the process is metastasis and the result is the formation of metastases	2	0	0	the process is metastasis and the result is the formation of metastases	2	0	0	0	0	0	0	0	0	the process is metastasis and the result is the formation of metastases	1	0	0	1	0	0	the process is metastasis and the result is the formation of metastases	0	0	0	1	0	0	1	0	0	the process is metastasis and the result is the formation of metastases	1	0	0	1	0	0
metastasis is both the process & the result	4	0	0	metastasis is both the process & the result	2	0	0	1	0	0	1	0	0	metastasis is both the process & the result	2	0	0	2	0	0	metastasis is both the process & the result	1	0	0	3	0	0	0	0	0	metastasis is both the process & the result	1	0	0	3	0	0
METASTASIS IS THE GROWTH OF A SECONDARY TUMOR	10	0	0	METASTASIS IS THE GROWTH OF A SECONDARY TUMOR	7	0	0	1	0	0	2	0	0	METASTASIS IS THE GROWTH OF A SECONDARY TUMOR	4	0	0	6	0	0	METASTASIS IS THE GROWTH OF A SECONDARY TUMOR	1	0	0	5	0	0	4	0	0	METASTASIS IS THE GROWTH OF A SECONDARY TUMOR	6	0	0	4	0	0
the formation of secondary tumors from a primary tumor at a distant site	1	0	0	the formation of secondary tumors from a primary tumor at a distant site	1	0	0	0	0	0	0	0	0	the formation of secondary tumors from a primary tumor at a distant site	1	0	0	0	0	0	the formation of secondary tumors from a primary tumor at a distant site	0	0	0	1	0	0	0	0	0	the formation of secondary tumors from a primary tumor at a distant site	1	0	0	0	0	0
the growth in a distant location	1	0	0	the growth in a distant location	1	0	0	0	0	0	0	0	0	the growth in a distant location	0	0	0	1	0	0	the growth in a distant location	1	0	0	0	0	0	0	0	0	the growth in a distant location	1	0	0	0	0	0
called secondary tumor sometimes	1	0	0	called secondary tumor sometimes	1	0	0	0	0	0	0	0	0	called secondary tumor sometimes	0	0	0	1	0	0	called secondary tumor sometimes	1	0	0	0	0	0	0	0	0	called secondary tumor sometimes	1	0	0	0	0	0
the event whereby tumor cells escape from the primary tumor and establish secondary tumors elsewhere in the body	2	0	0	the event whereby tumor cells escape from the primary tumor and establish secondary tumors elsewhere in the body	2	0	0	0	0	0	0	0	0	the event whereby tumor cells escape from the primary tumor and establish secondary tumors elsewhere in the body	1	0	0	1	0	0	the event whereby tumor cells escape from the primary tumor and establish secondary tumors elsewhere in the body	0	0	0	1	0	0	1	0	0	the event whereby tumor cells escape from the primary tumor and establish secondary tumors elsewhere in the body	2	0	0	0	0	0
the spread and growth of disseminated tumor cells away from the site that the cancer originally arose	1	0	0	the spread and growth of disseminated tumor cells away from the site that the cancer originally arose	1	0	0	0	0	0	0	0	0	the spread and growth of disseminated tumor cells away from the site that the cancer originally arose	1	0	0	0	0	0	the spread and growth of disseminated tumor cells away from the site that the cancer originally arose	0	0	0	1	0	0	0	0	0	the spread and growth of disseminated tumor cells away from the site that the cancer originally arose	1	0	0	0	0	0
it is the growth of a tumor at a secondary site / that cell then has to grow (to be concidered metastasis), not stay dormant	4	0	0	it is the growth of a tumor at a secondary site / that cell then has to grow (to be concidered metastasis), not stay dormant	3	0	0	0	0	0	1	0	0	it is the growth of a tumor at a secondary site / that cell then has to grow (to be concidered metastasis), not stay dormant	0	0	0	4	0	0	it is the growth of a tumor at a secondary site / that cell then has to grow (to be concidered metastasis), not stay dormant	1	0	0	3	0	0	0	0	0	it is the growth of a tumor at a secondary site / that cell then has to grow (to be concidered metastasis), not stay dormant	2	0	0	2	0	0
it has to be successful to the end, it has to have a successful colonization / has to be defined from the point of view of the patient, an unsuccessful metastasis really doesn’t affect the patient, only a successful one can kill the patient	3	0	0	it has to be successful to the end, it has to have a successful colonization / has to be defined from the point of view of the patient, an unsuccessful metastasis really doesn’t affect the patient, only a successful one can kill the patient	3	0	0	0	0	0	0	0	0	it has to be successful to the end, it has to have a successful colonization / has to be defined from the point of view of the patient, an unsuccessful metastasis really doesn’t affect the patient, only a successful one can kill the patient	0	0	0	3	0	0	it has to be successful to the end, it has to have a successful colonization / has to be defined from the point of view of the patient, an unsuccessful metastasis really doesn’t affect the patient, only a successful one can kill the patient	0	0	0	1	0	0	2	0	0	it has to be successful to the end, it has to have a successful colonization / has to be defined from the point of view of the patient, an unsuccessful metastasis really doesn’t affect the patient, only a successful one can kill the patient	2	0	0	1	0	0
distinctions of micro- metastasis and macro- metastasis, but overall I would consider metastasis to be a successful metastasis	1	0	0	distinctions of micro- metastasis and macro- metastasis, but overall I would consider metastasis to be a successful metastasis	1	0	0	0	0	0	0	0	0	distinctions of micro- metastasis and macro- metastasis, but overall I would consider metastasis to be a successful metastasis	0	0	0	1	0	0	distinctions of micro- metastasis and macro- metastasis, but overall I would consider metastasis to be a successful metastasis	0	0	0	0	0	0	1	0	0	distinctions of micro- metastasis and macro- metastasis, but overall I would consider metastasis to be a successful metastasis	1	0	0	0	0	0
in clinical use, a metastasis is used to describe an individual collection of cells that have began to propagate and grow and invade another organ of the body	1	0	0	in clinical use, a metastasis is used to describe an individual collection of cells that have began to propagate and grow and invade another organ of the body	0	0	0	1	0	0	0	0	0	in clinical use, a metastasis is used to describe an individual collection of cells that have began to propagate and grow and invade another organ of the body	1	0	0	0	0	0	in clinical use, a metastasis is used to describe an individual collection of cells that have began to propagate and grow and invade another organ of the body	0	0	0	0	0	0	1	0	0	in clinical use, a metastasis is used to describe an individual collection of cells that have began to propagate and grow and invade another organ of the body	0	0	0	1	0	0
it is a tumor which originates as a consequence of the dissemination of a single cell or a group of cells from the primary site’s tumor	1	0	0	it is a tumor which originates as a consequence of the dissemination of a single cell or a group of cells from the primary site’s tumor	1	0	0	0	0	0	0	0	0	it is a tumor which originates as a consequence of the dissemination of a single cell or a group of cells from the primary site’s tumor	0	0	0	1	0	0	it is a tumor which originates as a consequence of the dissemination of a single cell or a group of cells from the primary site’s tumor	0	0	0	1	0	0	0	0	0	it is a tumor which originates as a consequence of the dissemination of a single cell or a group of cells from the primary site’s tumor	0	0	0	1	0	0
is the outgrowth of the secondary tumor that is to me the process of metastasis	1	0	0	is the outgrowth of the secondary tumor that is to me the process of metastasis	1	0	0	0	0	0	0	0	0	is the outgrowth of the secondary tumor that is to me the process of metastasis	0	0	0	1	0	0	is the outgrowth of the secondary tumor that is to me the process of metastasis	0	0	0	1	0	0	0	0	0	is the outgrowth of the secondary tumor that is to me the process of metastasis	0	0	0	1	0	0
ultimately that progressive growth where you have clinically or biologically detectable and significant metastasis	1	0	0	ultimately that progressive growth where you have clinically or biologically detectable and significant metastasis	1	0	0	0	0	0	0	0	0	ultimately that progressive growth where you have clinically or biologically detectable and significant metastasis	0	0	0	1	0	0	ultimately that progressive growth where you have clinically or biologically detectable and significant metastasis	0	0	0	1	0	0	0	0	0	ultimately that progressive growth where you have clinically or biologically detectable and significant metastasis	0	0	0	1	0	0
you might cut off at fifty or a hundred cells or something like that, and there’s arguments about that, but you do have to have the cancer cell at the secondary site growing or something	1	0	0	you might cut off at fifty or a hundred cells or something like that, and there’s arguments about that, but you do have to have the cancer cell at the secondary site growing or something	1	0	0	0	0	0	0	0	0	you might cut off at fifty or a hundred cells or something like that, and there’s arguments about that, but you do have to have the cancer cell at the secondary site growing or something	0	0	0	1	0	0	you might cut off at fifty or a hundred cells or something like that, and there’s arguments about that, but you do have to have the cancer cell at the secondary site growing or something	0	0	0	1	0	0	0	0	0	you might cut off at fifty or a hundred cells or something like that, and there’s arguments about that, but you do have to have the cancer cell at the secondary site growing or something	0	0	0	1	0	0
as a pediatrician I more or less see it as result and not as a process	1	0	0	as a pediatrician I more or less see it as result and not as a process	0	0	0	0	0	0	1	0	0	as a pediatrician I more or less see it as result and not as a process	1	0	0	0	0	0	as a pediatrician I more or less see it as result and not as a process	0	0	0	0	0	0	1	0	0	as a pediatrician I more or less see it as result and not as a process	0	0	0	1	0	0
I have a hard time believing that metastasis occurs as we’re treating the kids	1	0	0	I have a hard time believing that metastasis occurs as we’re treating the kids	0	0	0	0	0	0	1	0	0	I have a hard time believing that metastasis occurs as we’re treating the kids	1	0	0	0	0	0	I have a hard time believing that metastasis occurs as we’re treating the kids	0	0	0	0	0	0	1	0	0	I have a hard time believing that metastasis occurs as we’re treating the kids	0	0	0	1	0	0
I don’t think about this process as on-going while I’m treating the patient	1	0	0	I don’t think about this process as on-going while I’m treating the patient	0	0	0	0	0	0	1	0	0	I don’t think about this process as on-going while I’m treating the patient	1	0	0	0	0	0	I don’t think about this process as on-going while I’m treating the patient	0	0	0	0	0	0	1	0	0	I don’t think about this process as on-going while I’m treating the patient	0	0	0	1	0	0
I’m not denying that there’s a process that goes on - it probably does	1	0	0	I’m not denying that there’s a process that goes on - it probably does	0	0	0	0	0	0	1	0	0	I’m not denying that there’s a process that goes on - it probably does	1	0	0	0	0	0	I’m not denying that there’s a process that goes on - it probably does	0	0	0	0	0	0	1	0	0	I’m not denying that there’s a process that goes on - it probably does	0	0	0	1	0	0
DETECTION & DEFINITION	4	0	0	DETECTION & DEFINITION	2	0	0	2	0	0	0	0	0	DETECTION & DEFINITION	2	0	0	2	0	0	DETECTION & DEFINITION	2	0	0	1	0	0	1	0	0	DETECTION & DEFINITION	1	0	0	3	0	0
that’s tricky because with better detection you can get/detect smaller things	1	0	0	that’s tricky because with better detection you can get/detect smaller things	1	0	0	0	0	0	0	0	0	that’s tricky because with better detection you can get/detect smaller things	0	0	0	1	0	0	that’s tricky because with better detection you can get/detect smaller things	0	0	0	1	0	0	0	0	0	that’s tricky because with better detection you can get/detect smaller things	0	0	0	1	0	0
clinicians are really guilty of saying “he has no metastasis”, well no metastasis that we can see	1	0	0	clinicians are really guilty of saying “he has no metastasis”, well no metastasis that we can see	0	0	0	1	0	0	0	0	0	clinicians are really guilty of saying “he has no metastasis”, well no metastasis that we can see	1	0	0	0	0	0	clinicians are really guilty of saying “he has no metastasis”, well no metastasis that we can see	0	0	0	0	0	0	1	0	0	clinicians are really guilty of saying “he has no metastasis”, well no metastasis that we can see	0	0	0	1	0	0
by the time you see metastasis there’s probably been a lot of time that the cells that have been in circulation in the body	1	0	0	by the time you see metastasis there’s probably been a lot of time that the cells that have been in circulation in the body	0	0	0	1	0	0	0	0	0	by the time you see metastasis there’s probably been a lot of time that the cells that have been in circulation in the body	0	0	0	1	0	0	by the time you see metastasis there’s probably been a lot of time that the cells that have been in circulation in the body	1	0	0	0	0	0	0	0	0	by the time you see metastasis there’s probably been a lot of time that the cells that have been in circulation in the body	0	0	0	1	0	0
a very strong distinction between a metastasizing cell and a metastasis that is detectable by eye or by most technologies that are used in the clinic to detect metastasis	1	0	0	a very strong distinction between a metastasizing cell and a metastasis that is detectable by eye or by most technologies that are used in the clinic to detect metastasis	1	0	0	0	0	0	0	0	0	a very strong distinction between a metastasizing cell and a metastasis that is detectable by eye or by most technologies that are used in the clinic to detect metastasis	1	0	0	0	0	0	a very strong distinction between a metastasizing cell and a metastasis that is detectable by eye or by most technologies that are used in the clinic to detect metastasis	1	0	0	0	0	0	0	0	0	a very strong distinction between a metastasizing cell and a metastasis that is detectable by eye or by most technologies that are used in the clinic to detect metastasis	1	0	0	0	0	0
METASTASIS IS A MULTISTAGE PROCESS	6	0	0	METASTASIS IS A MULTISTAGE PROCESS	5	0	0	1	0	0	0	0	0	METASTASIS IS A MULTISTAGE PROCESS	4	0	0	2	0	0	METASTASIS IS A MULTISTAGE PROCESS	1	0	0	2	0	0	3	0	0	METASTASIS IS A MULTISTAGE PROCESS	2	0	0	4	0	0
when I say metastasis I think of this whole process	1	0	0	when I say metastasis I think of this whole process	0	0	0	1	0	0	0	0	0	when I say metastasis I think of this whole process	1	0	0	0	0	0	when I say metastasis I think of this whole process	0	0	0	0	0	0	1	0	0	when I say metastasis I think of this whole process	0	0	0	1	0	0
a multistage process	3	0	0	a multistage process	3	0	0	0	0	0	0	0	0	a multistage process	1	0	0	2	0	0	a multistage process	0	0	0	1	0	0	2	0	0	a multistage process	2	0	0	1	0	0
it can become blocked at any step - so it is that process, it’s not the end result / multiple steps where things can go wrong	2	0	0	it can become blocked at any step - so it is that process, it’s not the end result / multiple steps where things can go wrong	2	0	0	0	0	0	0	0	0	it can become blocked at any step - so it is that process, it’s not the end result / multiple steps where things can go wrong	0	0	0	2	0	0	it can become blocked at any step - so it is that process, it’s not the end result / multiple steps where things can go wrong	0	0	0	1	0	0	1	0	0	it can become blocked at any step - so it is that process, it’s not the end result / multiple steps where things can go wrong	1	0	0	1	0	0
multiple steps in the process, understanding how a tumor cell disseminates out of the primary into the blood system is as much a part of understanding the process of metastasis as understanding factors in the lung or liver that might be influencing the growth	1	0	0	multiple steps in the process, understanding how a tumor cell disseminates out of the primary into the blood system is as much a part of understanding the process of metastasis as understanding factors in the lung or liver that might be influencing the growth	1	0	0	0	0	0	0	0	0	multiple steps in the process, understanding how a tumor cell disseminates out of the primary into the blood system is as much a part of understanding the process of metastasis as understanding factors in the lung or liver that might be influencing the growth	0	0	0	1	0	0	multiple steps in the process, understanding how a tumor cell disseminates out of the primary into the blood system is as much a part of understanding the process of metastasis as understanding factors in the lung or liver that might be influencing the growth	0	0	0	1	0	0	0	0	0	multiple steps in the process, understanding how a tumor cell disseminates out of the primary into the blood system is as much a part of understanding the process of metastasis as understanding factors in the lung or liver that might be influencing the growth	0	0	0	1	0	0
whether that is a coordinated process it needs to be determined or stochastic, random, it doesn’t matter	1	0	0	whether that is a coordinated process it needs to be determined or stochastic, random, it doesn’t matter	1	0	0	0	0	0	0	0	0	whether that is a coordinated process it needs to be determined or stochastic, random, it doesn’t matter	1	0	0	0	0	0	whether that is a coordinated process it needs to be determined or stochastic, random, it doesn’t matter	0	0	0	1	0	0	0	0	0	whether that is a coordinated process it needs to be determined or stochastic, random, it doesn’t matter	0	0	0	1	0	0
linear view - presupposes a primary tumor and a progression of events that finally leads to overt metastasis	1	0	0	linear view - presupposes a primary tumor and a progression of events that finally leads to overt metastasis	1	0	0	0	0	0	0	0	0	linear view - presupposes a primary tumor and a progression of events that finally leads to overt metastasis	1	0	0	0	0	0	linear view - presupposes a primary tumor and a progression of events that finally leads to overt metastasis	1	0	0	0	0	0	0	0	0	linear view - presupposes a primary tumor and a progression of events that finally leads to overt metastasis	0	0	0	1	0	0
STEPS IN THE PROCESS	6	1	0	STEPS IN THE PROCESS	2	1	0	3	0	0	1	0	0	STEPS IN THE PROCESS	4	0	0	2	1	0	STEPS IN THE PROCESS	1	0	0	4	1	0	1	0	0	STEPS IN THE PROCESS	2	0	0	4	1	0
the acquisition of a cancer cell of the ability to:*	1	0	0	the acquisition of a cancer cell of the ability to:*	0	0	0	0	0	0	1	0	0	the acquisition of a cancer cell of the ability to:*	0	0	0	1	0	0	the acquisition of a cancer cell of the ability to:*	0	0	0	1	0	0	0	0	0	the acquisition of a cancer cell of the ability to:*	1	0	0	0	0	0
it involves the following/ several fundamental steps: *	5	1	0	it involves the following/ several fundamental steps: *	2	1	0	3	0	0	0	0	0	it involves the following/ several fundamental steps: *	4	0	0	1	1	0	it involves the following/ several fundamental steps: *	1	0	0	3	1	0	1	0	0	it involves the following/ several fundamental steps: *	1	0	0	4	1	0
*primary tumor arises in a tissue or organ and gives rise to transformed cells	1	0	0	*primary tumor arises in a tissue or organ and gives rise to transformed cells	1	0	0	0	0	0	0	0	0	*primary tumor arises in a tissue or organ and gives rise to transformed cells	1	0	0	0	0	0	*primary tumor arises in a tissue or organ and gives rise to transformed cells	1	0	0	0	0	0	0	0	0	*primary tumor arises in a tissue or organ and gives rise to transformed cells	0	0	0	1	0	0
*cells acquire the capacity to invade adjacent tissues to separate themselves from their neighbors and grow independently	1	0	0	*cells acquire the capacity to invade adjacent tissues to separate themselves from their neighbors and grow independently	0	0	0	1	0	0	0	0	0	*cells acquire the capacity to invade adjacent tissues to separate themselves from their neighbors and grow independently	1	0	0	0	0	0	*cells acquire the capacity to invade adjacent tissues to separate themselves from their neighbors and grow independently	0	0	0	1	0	0	0	0	0	*cells acquire the capacity to invade adjacent tissues to separate themselves from their neighbors and grow independently	0	0	0	1	0	0
*detachment of cells from a primary tumor / break away from the tumor / free itself from the primary lesion	3	0	0	*detachment of cells from a primary tumor / break away from the tumor / free itself from the primary lesion	1	0	0	1	0	0	1	0	0	*detachment of cells from a primary tumor / break away from the tumor / free itself from the primary lesion	1	0	0	2	0	0	*detachment of cells from a primary tumor / break away from the tumor / free itself from the primary lesion	0	0	0	2	0	0	1	0	0	*detachment of cells from a primary tumor / break away from the tumor / free itself from the primary lesion	2	0	0	1	0	0
*first some sort of vessel has to reach the primary tumor, either lymphatic or blood	1	0	0	*first some sort of vessel has to reach the primary tumor, either lymphatic or blood	0	0	0	1	0	0	0	0	0	*first some sort of vessel has to reach the primary tumor, either lymphatic or blood	1	0	0	0	0	0	*first some sort of vessel has to reach the primary tumor, either lymphatic or blood	0	0	0	1	0	0	0	0	0	*first some sort of vessel has to reach the primary tumor, either lymphatic or blood	0	0	0	1	0	0
*intravasation / go through the endothelium / get/shed into the blood stream or into the lymphatics	5	0	0	*intravasation / go through the endothelium / get/shed into the blood stream or into the lymphatics	2	0	0	3	0	0	0	0	0	*intravasation / go through the endothelium / get/shed into the blood stream or into the lymphatics	4	0	0	1	0	0	*intravasation / go through the endothelium / get/shed into the blood stream or into the lymphatics	1	0	0	3	0	0	1	0	0	*intravasation / go through the endothelium / get/shed into the blood stream or into the lymphatics	1	0	0	4	0	0
*the tumor cells have to intersponse stem cells into the vessel	1	0	0	*the tumor cells have to intersponse stem cells into the vessel	0	0	0	1	0	0	0	0	0	*the tumor cells have to intersponse stem cells into the vessel	1	0	0	0	0	0	*the tumor cells have to intersponse stem cells into the vessel	0	0	0	1	0	0	0	0	0	*the tumor cells have to intersponse stem cells into the vessel	0	0	0	1	0	0
*circulation / stay alive while they travel / travel through the various either lymph nodes or blood system	3	0	0	*circulation / stay alive while they travel / travel through the various either lymph nodes or blood system	1	0	0	2	0	0	0	0	0	*circulation / stay alive while they travel / travel through the various either lymph nodes or blood system	2	0	0	1	0	0	*circulation / stay alive while they travel / travel through the various either lymph nodes or blood system	0	0	0	2	0	0	1	0	0	*circulation / stay alive while they travel / travel through the various either lymph nodes or blood system	1	0	0	2	0	0
*ability to invade	1	0	0	*ability to invade	1	0	0	0	0	0	0	0	0	*ability to invade	1	0	0	0	0	0	*ability to invade	0	0	0	0	0	0	1	0	0	*ability to invade	1	0	0	0	0	0
*motility / leave	2	0	0	*motility / leave	1	0	0	0	0	0	1	0	0	*motility / leave	1	0	0	1	0	0	*motility / leave	0	0	0	1	0	0	1	0	0	*motility / leave	2	0	0	0	0	0
*migration / travel to other sites in the body / drive	4	0	0	*migration / travel to other sites in the body / drive	2	0	0	1	0	0	1	0	0	*migration / travel to other sites in the body / drive	3	0	0	1	0	0	*migration / travel to other sites in the body / drive	1	0	0	2	0	0	1	0	0	*migration / travel to other sites in the body / drive	2	0	0	2	0	0
*extravasation / get through the endothelium to the other site / adhere to the lining of blood vessels or lymphatics and to crawl through them	2	0	0	*extravasation / get through the endothelium to the other site / adhere to the lining of blood vessels or lymphatics and to crawl through them	1	0	0	1	0	0	0	0	0	*extravasation / get through the endothelium to the other site / adhere to the lining of blood vessels or lymphatics and to crawl through them	2	0	0	0	0	0	*extravasation / get through the endothelium to the other site / adhere to the lining of blood vessels or lymphatics and to crawl through them	0	0	0	1	0	0	1	0	0	*extravasation / get through the endothelium to the other site / adhere to the lining of blood vessels or lymphatics and to crawl through them	1	0	0	1	0	0
*have additional signals in place for that metastatic cell to then develop into a clinically relevant metastatic nodule	1	0	0	*have additional signals in place for that metastatic cell to then develop into a clinically relevant metastatic nodule	0	0	0	1	0	0	0	0	0	*have additional signals in place for that metastatic cell to then develop into a clinically relevant metastatic nodule	0	0	0	1	0	0	*have additional signals in place for that metastatic cell to then develop into a clinically relevant metastatic nodule	0	0	0	1	0	0	0	0	0	*have additional signals in place for that metastatic cell to then develop into a clinically relevant metastatic nodule	0	0	0	1	0	0
*some of these become deposited in tissues on a long term or maybe even permanent basis	1	0	0	*some of these become deposited in tissues on a long term or maybe even permanent basis	1	0	0	0	0	0	0	0	0	*some of these become deposited in tissues on a long term or maybe even permanent basis	1	0	0	0	0	0	*some of these become deposited in tissues on a long term or maybe even permanent basis	1	0	0	0	0	0	0	0	0	*some of these become deposited in tissues on a long term or maybe even permanent basis	0	0	0	1	0	0
*colonization / colonize and grow independently in a different part of the body / nest and grow at the secondary site / grow independently / set up base in another location / divide and grow in a situation or in a tissue outside	5	0	0	*colonization / colonize and grow independently in a different part of the body / nest and grow at the secondary site / grow independently / set up base in another location / divide and grow in a situation or in a tissue outside	1	0	0	3	0	0	1	0	0	*colonization / colonize and grow independently in a different part of the body / nest and grow at the secondary site / grow independently / set up base in another location / divide and grow in a situation or in a tissue outside	3	0	0	2	0	0	*colonization / colonize and grow independently in a different part of the body / nest and grow at the secondary site / grow independently / set up base in another location / divide and grow in a situation or in a tissue outside	0	0	0	4	0	0	1	0	0	*colonization / colonize and grow independently in a different part of the body / nest and grow at the secondary site / grow independently / set up base in another location / divide and grow in a situation or in a tissue outside	2	0	0	3	0	0
*a few, eventually proliferate and grow out to become initially micrometastasis and then later overt metastasis	1	0	0	*a few, eventually proliferate and grow out to become initially micrometastasis and then later overt metastasis	1	0	0	0	0	0	0	0	0	*a few, eventually proliferate and grow out to become initially micrometastasis and then later overt metastasis	1	0	0	0	0	0	*a few, eventually proliferate and grow out to become initially micrometastasis and then later overt metastasis	1	0	0	0	0	0	0	0	0	*a few, eventually proliferate and grow out to become initially micrometastasis and then later overt metastasis	0	0	0	1	0	0
*then as they grow to foster new blood vessel growth into them so the tumor can grow to a macroscopic size	1	0	0	*then as they grow to foster new blood vessel growth into them so the tumor can grow to a macroscopic size	0	0	0	1	0	0	0	0	0	*then as they grow to foster new blood vessel growth into them so the tumor can grow to a macroscopic size	1	0	0	0	0	0	*then as they grow to foster new blood vessel growth into them so the tumor can grow to a macroscopic size	0	0	0	1	0	0	0	0	0	*then as they grow to foster new blood vessel growth into them so the tumor can grow to a macroscopic size	0	0	0	1	0	0
*there are many sub-stages	1	0	0	*there are many sub-stages	1	0	0	0	0	0	0	0	0	*there are many sub-stages	1	0	0	0	0	0	*there are many sub-stages	0	0	0	0	0	0	1	0	0	*there are many sub-stages	1	0	0	0	0	0
*the overall process is widely inefficient / cells get eliminated at every step, small percentage make it to the end	1	0	0	*the overall process is widely inefficient / cells get eliminated at every step, small percentage make it to the end	1	0	0	0	0	0	0	0	0	*the overall process is widely inefficient / cells get eliminated at every step, small percentage make it to the end	1	0	0	0	0	0	*the overall process is widely inefficient / cells get eliminated at every step, small percentage make it to the end	1	0	0	0	0	0	0	0	0	*the overall process is widely inefficient / cells get eliminated at every step, small percentage make it to the end	0	0	0	1	0	0
ROUTE	8	0	0	ROUTE	5	0	0	1	0	0	2	0	0	ROUTE	4	0	0	4	0	0	ROUTE	2	0	0	4	0	0	2	0	0	ROUTE	3	0	0	5	0	0
movement of a cancer cell independent of route, independent of the way it gets there	1	0	0	movement of a cancer cell independent of route, independent of the way it gets there	1	0	0	0	0	0	0	0	0	movement of a cancer cell independent of route, independent of the way it gets there	0	0	0	1	0	0	movement of a cancer cell independent of route, independent of the way it gets there	0	0	0	1	0	0	0	0	0	movement of a cancer cell independent of route, independent of the way it gets there	0	0	0	1	0	0
it could be in hematopoietic, it could be lymphatic, it can be intraperitoneal (like from an ovary)	1	0	0	it could be in hematopoietic, it could be lymphatic, it can be intraperitoneal (like from an ovary)	1	0	0	0	0	0	0	0	0	it could be in hematopoietic, it could be lymphatic, it can be intraperitoneal (like from an ovary)	0	0	0	1	0	0	it could be in hematopoietic, it could be lymphatic, it can be intraperitoneal (like from an ovary)	0	0	0	1	0	0	0	0	0	it could be in hematopoietic, it could be lymphatic, it can be intraperitoneal (like from an ovary)	0	0	0	1	0	0
can be lymphatic spread or hematogenous spread	6	0	0	can be lymphatic spread or hematogenous spread	4	0	0	1	0	0	1	0	0	can be lymphatic spread or hematogenous spread	3	0	0	3	0	0	can be lymphatic spread or hematogenous spread	2	0	0	3	0	0	1	0	0	can be lymphatic spread or hematogenous spread	3	0	0	3	0	0
above statement is for solid tumors, ie not leukemia	1	0	0	above statement is for solid tumors, ie not leukemia	0	0	0	0	0	0	1	0	0	above statement is for solid tumors, ie not leukemia	1	0	0	0	0	0	above statement is for solid tumors, ie not leukemia	0	0	0	0	0	0	1	0	0	above statement is for solid tumors, ie not leukemia	0	0	0	1	0	0
METASTASIS IS PART OF CANCER	5	0	0	METASTASIS IS PART OF CANCER	3	0	0	1	0	0	1	0	0	METASTASIS IS PART OF CANCER	5	0	0	0	0	0	METASTASIS IS PART OF CANCER	1	0	0	3	0	0	1	0	0	METASTASIS IS PART OF CANCER	1	0	0	4	0	0
metastasis reflects a specific stage of the disease, or best to say, a specific condition of the disease, when the primary tumor may be controlled but the problem is in the appearance of the distant, disseminated mini-tumors	1	0	0	metastasis reflects a specific stage of the disease, or best to say, a specific condition of the disease, when the primary tumor may be controlled but the problem is in the appearance of the distant, disseminated mini-tumors	1	0	0	0	0	0	0	0	0	metastasis reflects a specific stage of the disease, or best to say, a specific condition of the disease, when the primary tumor may be controlled but the problem is in the appearance of the distant, disseminated mini-tumors	1	0	0	0	0	0	metastasis reflects a specific stage of the disease, or best to say, a specific condition of the disease, when the primary tumor may be controlled but the problem is in the appearance of the distant, disseminated mini-tumors	1	0	0	0	0	0	0	0	0	metastasis reflects a specific stage of the disease, or best to say, a specific condition of the disease, when the primary tumor may be controlled but the problem is in the appearance of the distant, disseminated mini-tumors	0	0	0	1	0	0
an absolutely key event in tumor development	1	0	0	an absolutely key event in tumor development	1	0	0	0	0	0	0	0	0	an absolutely key event in tumor development	1	0	0	0	0	0	an absolutely key event in tumor development	0	0	0	1	0	0	0	0	0	an absolutely key event in tumor development	1	0	0	0	0	0
when we have the stage of dissemination, we actually, almost completely lost control over the tumor - that is the main problem with metastasis	1	0	0	when we have the stage of dissemination, we actually, almost completely lost control over the tumor - that is the main problem with metastasis	1	0	0	0	0	0	0	0	0	when we have the stage of dissemination, we actually, almost completely lost control over the tumor - that is the main problem with metastasis	1	0	0	0	0	0	when we have the stage of dissemination, we actually, almost completely lost control over the tumor - that is the main problem with metastasis	1	0	0	0	0	0	0	0	0	when we have the stage of dissemination, we actually, almost completely lost control over the tumor - that is the main problem with metastasis	0	0	0	1	0	0
the biggest problem in cancer	1	0	0	the biggest problem in cancer	0	0	0	0	0	0	1	0	0	the biggest problem in cancer	1	0	0	0	0	0	the biggest problem in cancer	0	0	0	0	0	0	1	0	0	the biggest problem in cancer	0	0	0	1	0	0
metastasis is what kills / the most lethal aspect of cancer	2	0	0	metastasis is what kills / the most lethal aspect of cancer	1	0	0	1	0	0	0	0	0	metastasis is what kills / the most lethal aspect of cancer	2	0	0	0	0	0	metastasis is what kills / the most lethal aspect of cancer	0	0	0	2	0	0	0	0	0	metastasis is what kills / the most lethal aspect of cancer	1	0	0	1	0	0
a process during which cancer cells change their phenotype	1	0	0	a process during which cancer cells change their phenotype	1	0	0	0	0	0	0	0	0	a process during which cancer cells change their phenotype	1	0	0	0	0	0	a process during which cancer cells change their phenotype	0	0	0	1	0	0	0	0	0	a process during which cancer cells change their phenotype	0	0	0	1	0	0
IT IS NOT CLEAR WHAT IT IS	3	0	0	IT IS NOT CLEAR WHAT IT IS	2	0	0	0	0	0	1	0	0	IT IS NOT CLEAR WHAT IT IS	1	0	0	2	0	0	IT IS NOT CLEAR WHAT IT IS	1	0	0	2	0	0	0	0	0	IT IS NOT CLEAR WHAT IT IS	1	0	0	2	0	0
it’s a very broad definition	1	0	0	it’s a very broad definition	0	0	0	0	0	0	1	0	0	it’s a very broad definition	0	0	0	1	0	0	it’s a very broad definition	0	0	0	1	0	0	0	0	0	it’s a very broad definition	1	0	0	0	0	0
it’s kind of a tricky word, because it can be a verb, it can be a noun, it can be an adjective… so the language in the literature is very sloppy - makes it confusing for people come in from outside	1	0	0	it’s kind of a tricky word, because it can be a verb, it can be a noun, it can be an adjective… so the language in the literature is very sloppy - makes it confusing for people come in from outside	1	0	0	0	0	0	0	0	0	it’s kind of a tricky word, because it can be a verb, it can be a noun, it can be an adjective… so the language in the literature is very sloppy - makes it confusing for people come in from outside	0	0	0	1	0	0	it’s kind of a tricky word, because it can be a verb, it can be a noun, it can be an adjective… so the language in the literature is very sloppy - makes it confusing for people come in from outside	0	0	0	1	0	0	0	0	0	it’s kind of a tricky word, because it can be a verb, it can be a noun, it can be an adjective… so the language in the literature is very sloppy - makes it confusing for people come in from outside	0	0	0	1	0	0
no clear consensus between people in what metastasis is	1	0	0	no clear consensus between people in what metastasis is	1	0	0	0	0	0	0	0	0	no clear consensus between people in what metastasis is	1	0	0	0	0	0	no clear consensus between people in what metastasis is	1	0	0	0	0	0	0	0	0	no clear consensus between people in what metastasis is	0	0	0	1	0	0
TIMING	1	0	0	TIMING	1	0	0	0	0	0	0	0	0	TIMING	1	0	0	0	0	0	TIMING	1	0	0	0	0	0	0	0	0	TIMING	0	0	0	1	0	0
some fuzziness on when do these early events take place	1	0	0	some fuzziness on when do these early events take place	1	0	0	0	0	0	0	0	0	some fuzziness on when do these early events take place	1	0	0	0	0	0	some fuzziness on when do these early events take place	1	0	0	0	0	0	0	0	0	some fuzziness on when do these early events take place	0	0	0	1	0	0
fuzziness at all levels	1	0	0	fuzziness at all levels	1	0	0	0	0	0	0	0	0	fuzziness at all levels	1	0	0	0	0	0	fuzziness at all levels	1	0	0	0	0	0	0	0	0	fuzziness at all levels	0	0	0	1	0	0
fuzziness whether or not some of this dissemination could even proceed prior to a fully formed primary tumor	1	0	0	fuzziness whether or not some of this dissemination could even proceed prior to a fully formed primary tumor	1	0	0	0	0	0	0	0	0	fuzziness whether or not some of this dissemination could even proceed prior to a fully formed primary tumor	1	0	0	0	0	0	fuzziness whether or not some of this dissemination could even proceed prior to a fully formed primary tumor	1	0	0	0	0	0	0	0	0	fuzziness whether or not some of this dissemination could even proceed prior to a fully formed primary tumor	0	0	0	1	0	0
WHEN IT OCCURS --> Q1	4	0	0	WHEN IT OCCURS --> Q1	3	0	0	1	0	0	0	0	0	WHEN IT OCCURS --> Q1	3	0	0	1	0	0	WHEN IT OCCURS --> Q1	4	0	0	0	0	0	0	0	0	WHEN IT OCCURS --> Q1	1	0	0	3	0	0
quite convinced that some tumor cells have metastatic potential even right from the beginning	1	0	0	quite convinced that some tumor cells have metastatic potential even right from the beginning	0	0	0	1	0	0	0	0	0	quite convinced that some tumor cells have metastatic potential even right from the beginning	0	0	0	1	0	0	quite convinced that some tumor cells have metastatic potential even right from the beginning	1	0	0	0	0	0	0	0	0	quite convinced that some tumor cells have metastatic potential even right from the beginning	0	0	0	1	0	0
even before you have a primary tumor, hyperplastic cells could begin disseminating	1	0	0	even before you have a primary tumor, hyperplastic cells could begin disseminating	1	0	0	0	0	0	0	0	0	even before you have a primary tumor, hyperplastic cells could begin disseminating	1	0	0	0	0	0	even before you have a primary tumor, hyperplastic cells could begin disseminating	1	0	0	0	0	0	0	0	0	even before you have a primary tumor, hyperplastic cells could begin disseminating	0	0	0	1	0	0
what later appears to be a metastasis from the primary tumor, maybe could even be a sibling	1	0	0	what later appears to be a metastasis from the primary tumor, maybe could even be a sibling	1	0	0	0	0	0	0	0	0	what later appears to be a metastasis from the primary tumor, maybe could even be a sibling	1	0	0	0	0	0	what later appears to be a metastasis from the primary tumor, maybe could even be a sibling	1	0	0	0	0	0	0	0	0	what later appears to be a metastasis from the primary tumor, maybe could even be a sibling	0	0	0	1	0	0
the problem is where the spread occurs: can it occur in the moment of appearance of the primary tumor? or very soon after that or it will occur only on the later, on the relative later stages of the tumor	1	0	0	the problem is where the spread occurs: can it occur in the moment of appearance of the primary tumor? or very soon after that or it will occur only on the later, on the relative later stages of the tumor	1	0	0	0	0	0	0	0	0	the problem is where the spread occurs: can it occur in the moment of appearance of the primary tumor? or very soon after that or it will occur only on the later, on the relative later stages of the tumor	1	0	0	0	0	0	the problem is where the spread occurs: can it occur in the moment of appearance of the primary tumor? or very soon after that or it will occur only on the later, on the relative later stages of the tumor	1	0	0	0	0	0	0	0	0	the problem is where the spread occurs: can it occur in the moment of appearance of the primary tumor? or very soon after that or it will occur only on the later, on the relative later stages of the tumor	0	0	0	1	0	0
another problem is even if it occurs on the late stages, how can it be assumed that the mass will be similar to primary tumor, or not	1	0	0	another problem is even if it occurs on the late stages, how can it be assumed that the mass will be similar to primary tumor, or not	1	0	0	0	0	0	0	0	0	another problem is even if it occurs on the late stages, how can it be assumed that the mass will be similar to primary tumor, or not	1	0	0	0	0	0	another problem is even if it occurs on the late stages, how can it be assumed that the mass will be similar to primary tumor, or not	1	0	0	0	0	0	0	0	0	another problem is even if it occurs on the late stages, how can it be assumed that the mass will be similar to primary tumor, or not	0	0	0	1	0	0
in melanoma, metastasis can occur when the tumor is as little as a few millimeters deep	1	0	0	in melanoma, metastasis can occur when the tumor is as little as a few millimeters deep	1	0	0	0	0	0	0	0	0	in melanoma, metastasis can occur when the tumor is as little as a few millimeters deep	1	0	0	0	0	0	in melanoma, metastasis can occur when the tumor is as little as a few millimeters deep	1	0	0	0	0	0	0	0	0	in melanoma, metastasis can occur when the tumor is as little as a few millimeters deep	1	0	0	0	0	0
MOLECULAR ASPECTS / GENES --> Q3	3	0	0	MOLECULAR ASPECTS / GENES --> Q3	1	0	0	2	0	0	0	0	0	MOLECULAR ASPECTS / GENES --> Q3	2	0	0	1	0	0	MOLECULAR ASPECTS / GENES --> Q3	1	0	0	1	0	0	1	0	0	MOLECULAR ASPECTS / GENES --> Q3	1	0	0	2	0	0
molecular point of view, has a lot to do with the tumor cells as well as the host	1	0	0	molecular point of view, has a lot to do with the tumor cells as well as the host	0	0	0	1	0	0	0	0	0	molecular point of view, has a lot to do with the tumor cells as well as the host	1	0	0	0	0	0	molecular point of view, has a lot to do with the tumor cells as well as the host	0	0	0	1	0	0	0	0	0	molecular point of view, has a lot to do with the tumor cells as well as the host	0	0	0	1	0	0
different sets of genes or proteins govern each of these steps – with obvious overlap between them	1	0	0	different sets of genes or proteins govern each of these steps – with obvious overlap between them	0	0	0	1	0	0	0	0	0	different sets of genes or proteins govern each of these steps – with obvious overlap between them	1	0	0	0	0	0	different sets of genes or proteins govern each of these steps – with obvious overlap between them	0	0	0	1	0	0	0	0	0	different sets of genes or proteins govern each of these steps – with obvious overlap between them	0	0	0	1	0	0
the unique genes and proteins that play a role in each step may indeed be just that – unique	1	0	0	the unique genes and proteins that play a role in each step may indeed be just that – unique	0	0	0	1	0	0	0	0	0	the unique genes and proteins that play a role in each step may indeed be just that – unique	1	0	0	0	0	0	the unique genes and proteins that play a role in each step may indeed be just that – unique	0	0	0	1	0	0	0	0	0	the unique genes and proteins that play a role in each step may indeed be just that – unique	0	0	0	1	0	0
it may involve additional changes in the primary tumor for that (cells to leave/metastasize) to happen	1	0	0	it may involve additional changes in the primary tumor for that (cells to leave/metastasize) to happen	1	0	0	0	0	0	0	0	0	it may involve additional changes in the primary tumor for that (cells to leave/metastasize) to happen	0	0	0	1	0	0	it may involve additional changes in the primary tumor for that (cells to leave/metastasize) to happen	0	0	0	0	0	0	1	0	0	it may involve additional changes in the primary tumor for that (cells to leave/metastasize) to happen	1	0	0	0	0	0
molecular level many of the events that occur in the neurocrest also occur in the metastatic cell, like increase in TWIST expression and increases in SNAIL expression, changes in the repertoire of the adhesion molecules that are on the surface of the cells	1	0	0	molecular level many of the events that occur in the neurocrest also occur in the metastatic cell, like increase in TWIST expression and increases in SNAIL expression, changes in the repertoire of the adhesion molecules that are on the surface of the cells	0	0	0	1	0	0	0	0	0	molecular level many of the events that occur in the neurocrest also occur in the metastatic cell, like increase in TWIST expression and increases in SNAIL expression, changes in the repertoire of the adhesion molecules that are on the surface of the cells	1	0	0	0	0	0	molecular level many of the events that occur in the neurocrest also occur in the metastatic cell, like increase in TWIST expression and increases in SNAIL expression, changes in the repertoire of the adhesion molecules that are on the surface of the cells	1	0	0	0	0	0	0	0	0	molecular level many of the events that occur in the neurocrest also occur in the metastatic cell, like increase in TWIST expression and increases in SNAIL expression, changes in the repertoire of the adhesion molecules that are on the surface of the cells	0	0	0	1	0	0
TROPISM --> Q4	1	0	0	TROPISM --> Q4	1	0	0	0	0	0	0	0	0	TROPISM --> Q4	1	0	0	0	0	0	TROPISM --> Q4	1	0	0	0	0	0	0	0	0	TROPISM --> Q4	0	0	0	1	0	0
there are preferred residence sites	1	0	0	there are preferred residence sites	1	0	0	0	0	0	0	0	0	there are preferred residence sites	1	0	0	0	0	0	there are preferred residence sites	1	0	0	0	0	0	0	0	0	there are preferred residence sites	0	0	0	1	0	0
SIMILARITIES WITH DEVELOPMENT/EVOLUTION --> Q5	2	0	0	SIMILARITIES WITH DEVELOPMENT/EVOLUTION --> Q5	1	0	0	1	0	0	0	0	0	SIMILARITIES WITH DEVELOPMENT/EVOLUTION --> Q5	2	0	0	0	0	0	SIMILARITIES WITH DEVELOPMENT/EVOLUTION --> Q5	1	0	0	1	0	0	0	0	0	SIMILARITIES WITH DEVELOPMENT/EVOLUTION --> Q5	0	0	0	2	0	0
certainly, the great Darwinian selection process going on, there’s no doubt of that in my mind anyway	1	0	0	certainly, the great Darwinian selection process going on, there’s no doubt of that in my mind anyway	1	0	0	0	0	0	0	0	0	certainly, the great Darwinian selection process going on, there’s no doubt of that in my mind anyway	1	0	0	0	0	0	certainly, the great Darwinian selection process going on, there’s no doubt of that in my mind anyway	0	0	0	1	0	0	0	0	0	certainly, the great Darwinian selection process going on, there’s no doubt of that in my mind anyway	0	0	0	1	0	0
many of the same events that occur during neurocrest development	1	0	0	many of the same events that occur during neurocrest development	0	0	0	1	0	0	0	0	0	many of the same events that occur during neurocrest development	1	0	0	0	0	0	many of the same events that occur during neurocrest development	1	0	0	0	0	0	0	0	0	many of the same events that occur during neurocrest development	0	0	0	1	0	0
the cancer cells acquire something - everything the cancer cell does you can find in the body somewhere, sometime… during development, wound healing… so these programs can be turned back on	1	0	0	the cancer cells acquire something - everything the cancer cell does you can find in the body somewhere, sometime… during development, wound healing… so these programs can be turned back on	1	0	0	0	0	0	0	0	0	the cancer cells acquire something - everything the cancer cell does you can find in the body somewhere, sometime… during development, wound healing… so these programs can be turned back on	1	0	0	0	0	0	the cancer cells acquire something - everything the cancer cell does you can find in the body somewhere, sometime… during development, wound healing… so these programs can be turned back on	0	0	0	1	0	0	0	0	0	the cancer cells acquire something - everything the cancer cell does you can find in the body somewhere, sometime… during development, wound healing… so these programs can be turned back on	0	0	0	1	0	0
CLINICAL ISSUES	1	0	0	CLINICAL ISSUES	0	0	0	1	0	0	0	0	0	CLINICAL ISSUES	1	0	0	0	0	0	CLINICAL ISSUES	0	0	0	1	0	0	0	0	0	CLINICAL ISSUES	0	0	0	1	0	0
from the clinical point of view, the location of the metastasis depends on: the type of the tumour	1	0	0	from the clinical point of view, the location of the metastasis depends on: the type of the tumour	0	0	0	1	0	0	0	0	0	from the clinical point of view, the location of the metastasis depends on: the type of the tumour	1	0	0	0	0	0	from the clinical point of view, the location of the metastasis depends on: the type of the tumour	0	0	0	1	0	0	0	0	0	from the clinical point of view, the location of the metastasis depends on: the type of the tumour	0	0	0	1	0	0
from the clinical point of view, the location of the metastasis depends on: the location of the primary tumour	1	0	0	from the clinical point of view, the location of the metastasis depends on: the location of the primary tumour	0	0	0	1	0	0	0	0	0	from the clinical point of view, the location of the metastasis depends on: the location of the primary tumour	1	0	0	0	0	0	from the clinical point of view, the location of the metastasis depends on: the location of the primary tumour	0	0	0	1	0	0	0	0	0	from the clinical point of view, the location of the metastasis depends on: the location of the primary tumour	0	0	0	1	0	0
from the clinical point of view, the location of the metastasis depends on: the patient	1	0	0	from the clinical point of view, the location of the metastasis depends on: the patient	0	0	0	1	0	0	0	0	0	from the clinical point of view, the location of the metastasis depends on: the patient	1	0	0	0	0	0	from the clinical point of view, the location of the metastasis depends on: the patient	0	0	0	1	0	0	0	0	0	from the clinical point of view, the location of the metastasis depends on: the patient	0	0	0	1	0	0
clinical manifestations / symptoms or signs: depends where the metastases are	1	0	0	clinical manifestations / symptoms or signs: depends where the metastases are	0	0	0	1	0	0	0	0	0	clinical manifestations / symptoms or signs: depends where the metastases are	1	0	0	0	0	0	clinical manifestations / symptoms or signs: depends where the metastases are	0	0	0	1	0	0	0	0	0	clinical manifestations / symptoms or signs: depends where the metastases are	0	0	0	1	0	0
clinically certain areas or locations of metastases are especially worry-some, eg, brain, bone	1	0	0	clinically certain areas or locations of metastases are especially worry-some, eg, brain, bone	0	0	0	1	0	0	0	0	0	clinically certain areas or locations of metastases are especially worry-some, eg, brain, bone	1	0	0	0	0	0	clinically certain areas or locations of metastases are especially worry-some, eg, brain, bone	0	0	0	1	0	0	0	0	0	clinically certain areas or locations of metastases are especially worry-some, eg, brain, bone	0	0	0	1	0	0
clinically unless is widespread or involves a large part of the metastatic organ, most patients are asymptomatic	1	0	0	clinically unless is widespread or involves a large part of the metastatic organ, most patients are asymptomatic	0	0	0	1	0	0	0	0	0	clinically unless is widespread or involves a large part of the metastatic organ, most patients are asymptomatic	1	0	0	0	0	0	clinically unless is widespread or involves a large part of the metastatic organ, most patients are asymptomatic	0	0	0	1	0	0	0	0	0	clinically unless is widespread or involves a large part of the metastatic organ, most patients are asymptomatic	0	0	0	1	0	0
clinically once there is metastatic spread and we move from a curable to palliative setting	1	0	0	clinically once there is metastatic spread and we move from a curable to palliative setting	0	0	0	1	0	0	0	0	0	clinically once there is metastatic spread and we move from a curable to palliative setting	1	0	0	0	0	0	clinically once there is metastatic spread and we move from a curable to palliative setting	0	0	0	1	0	0	0	0	0	clinically once there is metastatic spread and we move from a curable to palliative setting	0	0	0	1	0	0
INDIVIDUAL METASTASIS VS WIDELY DISSEMINATED	1	0	0	INDIVIDUAL METASTASIS VS WIDELY DISSEMINATED	1	0	0	0	0	0	0	0	0	INDIVIDUAL METASTASIS VS WIDELY DISSEMINATED	1	0	0	0	0	0	INDIVIDUAL METASTASIS VS WIDELY DISSEMINATED	1	0	0	0	0	0	0	0	0	INDIVIDUAL METASTASIS VS WIDELY DISSEMINATED	0	0	0	1	0	0
could be individual metastasis and they may only be a few that are treatable, maybe even curable	1	0	0	could be individual metastasis and they may only be a few that are treatable, maybe even curable	1	0	0	0	0	0	0	0	0	could be individual metastasis and they may only be a few that are treatable, maybe even curable	1	0	0	0	0	0	could be individual metastasis and they may only be a few that are treatable, maybe even curable	1	0	0	0	0	0	0	0	0	could be individual metastasis and they may only be a few that are treatable, maybe even curable	0	0	0	1	0	0
could be more widely disseminated to the point where it may not be particularly curable, at least not with current methodologies	1	0	0	could be more widely disseminated to the point where it may not be particularly curable, at least not with current methodologies	1	0	0	0	0	0	0	0	0	could be more widely disseminated to the point where it may not be particularly curable, at least not with current methodologies	1	0	0	0	0	0	could be more widely disseminated to the point where it may not be particularly curable, at least not with current methodologies	1	0	0	0	0	0	0	0	0	could be more widely disseminated to the point where it may not be particularly curable, at least not with current methodologies	0	0	0	1	0	0
THERAPY	1	0	0	THERAPY	1	0	0	0	0	0	0	0	0	THERAPY	1	0	0	0	0	0	THERAPY	1	0	0	0	0	0	0	0	0	THERAPY	0	0	0	1	0	0
definitely true that primary tumors and metastatic tumors do have differences respond to therapy and their behavior - not behaving the same way	1	0	0	definitely true that primary tumors and metastatic tumors do have differences respond to therapy and their behavior - not behaving the same way	1	0	0	0	0	0	0	0	0	definitely true that primary tumors and metastatic tumors do have differences respond to therapy and their behavior - not behaving the same way	1	0	0	0	0	0	definitely true that primary tumors and metastatic tumors do have differences respond to therapy and their behavior - not behaving the same way	1	0	0	0	0	0	0	0	0	definitely true that primary tumors and metastatic tumors do have differences respond to therapy and their behavior - not behaving the same way	0	0	0	1	0	0
METASTASIZING METASTASIS	1	0	0	METASTASIZING METASTASIS	1	0	0	0	0	0	0	0	0	METASTASIZING METASTASIS	0	0	0	1	0	0	METASTASIZING METASTASIS	1	0	0	0	0	0	0	0	0	METASTASIZING METASTASIS	1	0	0	0	0	0
there’s also a feeling that metastasis metastasize, and there may be 3rd generations…	1	0	0	there’s also a feeling that metastasis metastasize, and there may be 3rd generations…	1	0	0	0	0	0	0	0	0	there’s also a feeling that metastasis metastasize, and there may be 3rd generations…	0	0	0	1	0	0	there’s also a feeling that metastasis metastasize, and there may be 3rd generations…	1	0	0	0	0	0	0	0	0	there’s also a feeling that metastasis metastasize, and there may be 3rd generations…	1	0	0	0	0	0

## Sheet: definition_main-groups
idea	A_all	M_all	D_all	idea	A_phd	M_phd	D_phd	A_md	M_md	D_md	A_mdphd	M_mdphd	D_mdphd	idea	A_men	M_men	D_men	A_women	M_women	D_women	idea	A_upto86	M_upto86	D_upto86	A_from86to95	M_from86to95	D_from86to95	A_after95	M_after95	D_after95	idea	A_phone	M_phone	D_phone	A_inperson	M_inperson	D_inperson
METASTASIS IS THE SPREAD	15	0	-1	METASTASIS IS THE SPREAD	8	0	1	2	0	0	5	0	0	METASTASIS IS THE SPREAD	9	0	0	6	0	1	METASTASIS IS THE SPREAD	7	0	0	4	0	0	4	0	1	METASTASIS IS THE SPREAD	8	0	1	7	0	0
METASTASIS IS THE GROWTH OF A SECONDARY TUMOR	10	0	0	METASTASIS IS THE GROWTH OF A SECONDARY TUMOR	7	0	0	1	0	0	2	0	0	METASTASIS IS THE GROWTH OF A SECONDARY TUMOR	4	0	0	6	0	0	METASTASIS IS THE GROWTH OF A SECONDARY TUMOR	1	0	0	5	0	0	4	0	0	METASTASIS IS THE GROWTH OF A SECONDARY TUMOR	6	0	0	4	0	0
THE DIFFERENCE BETWEEN SPREAD & SECONDARY TUMOR	9	0	0	THE DIFFERENCE BETWEEN SPREAD & SECONDARY TUMOR	4	0	0	3	0	0	2	0	0	THE DIFFERENCE BETWEEN SPREAD & SECONDARY TUMOR	6	0	0	3	0	0	THE DIFFERENCE BETWEEN SPREAD & SECONDARY TUMOR	1	0	0	5	0	0	3	0	0	THE DIFFERENCE BETWEEN SPREAD & SECONDARY TUMOR	2	0	0	7	0	0
ROUTE	8	0	0	ROUTE	5	0	0	1	0	0	2	0	0	ROUTE	4	0	0	4	0	0	ROUTE	2	0	0	4	0	0	2	0	0	ROUTE	3	0	0	5	0	0
METASTASIS IS A MULTISTAGE PROCESS	6	0	0	METASTASIS IS A MULTISTAGE PROCESS	5	0	0	1	0	0	0	0	0	METASTASIS IS A MULTISTAGE PROCESS	4	0	0	2	0	0	METASTASIS IS A MULTISTAGE PROCESS	1	0	0	2	0	0	3	0	0	METASTASIS IS A MULTISTAGE PROCESS	2	0	0	4	0	0
STEPS IN THE PROCESS	6	1	0	STEPS IN THE PROCESS	2	1	0	3	0	0	1	0	0	STEPS IN THE PROCESS	4	0	0	2	1	0	STEPS IN THE PROCESS	1	0	0	4	1	0	1	0	0	STEPS IN THE PROCESS	2	0	0	4	1	0
DISTANT VS REGIONAL	5	0	0	DISTANT VS REGIONAL	2	0	0	0	0	0	3	0	0	DISTANT VS REGIONAL	3	0	0	2	0	0	DISTANT VS REGIONAL	2	0	0	1	0	0	2	0	0	DISTANT VS REGIONAL	3	0	0	2	0	0
METASTASIS IS PART OF CANCER	5	0	0	METASTASIS IS PART OF CANCER	3	0	0	1	0	0	1	0	0	METASTASIS IS PART OF CANCER	5	0	0	0	0	0	METASTASIS IS PART OF CANCER	1	0	0	3	0	0	1	0	0	METASTASIS IS PART OF CANCER	1	0	0	4	0	0
DETECTION & DEFINITION	4	0	0	DETECTION & DEFINITION	2	0	0	2	0	0	0	0	0	DETECTION & DEFINITION	2	0	0	2	0	0	DETECTION & DEFINITION	2	0	0	1	0	0	1	0	0	DETECTION & DEFINITION	1	0	0	3	0	0
IT IS NOT CLEAR WHAT IT IS	3	0	0	IT IS NOT CLEAR WHAT IT IS	2	0	0	0	0	0	1	0	0	IT IS NOT CLEAR WHAT IT IS	1	0	0	2	0	0	IT IS NOT CLEAR WHAT IT IS	1	0	0	2	0	0	0	0	0	IT IS NOT CLEAR WHAT IT IS	1	0	0	2	0	0

## Sheet: stage_all
idea	A_all	M_all	D_all	idea	A_phd	M_phd	D_phd	A_md	M_md	D_md	A_mdphd	M_mdphd	D_mdphd	idea	A_men	M_men	D_men	A_women	M_women	D_women	idea	A_upto86	M_upto86	D_upto86	A_from86to95	M_from86to95	D_from86to95	A_after95	M_after95	D_after95	idea	A_phone	M_phone	D_phone	A_inperson	M_inperson	D_inperson
WHEN	25	5	2	WHEN	13	1	1	6	2	1	6	2	0	WHEN	16	3	0	9	2	2	WHEN	8	2	1	9	2	0	8	1	1	WHEN	10	1	0	15	4	2
* early-beginning *	11	0	1	* early-beginning *	4	0	1	3	0	0	4	0	0	* early-beginning *	7	0	0	4	0	1	* early-beginning *	3	0	0	4	0	0	4	0	1	* early-beginning *	5	0	0	6	0	1
as soon as they develop - from the very beginning they have the potential / the tumor cells have the abilities all the way from the start / from the get go	7	0	1	as soon as they develop - from the very beginning they have the potential / the tumor cells have the abilities all the way from the start / from the get go	2	0	1	2	0	0	3	0	0	as soon as they develop - from the very beginning they have the potential / the tumor cells have the abilities all the way from the start / from the get go	5	0	0	2	0	1	as soon as they develop - from the very beginning they have the potential / the tumor cells have the abilities all the way from the start / from the get go	2	0	0	2	0	0	3	0	1	as soon as they develop - from the very beginning they have the potential / the tumor cells have the abilities all the way from the start / from the get go	2	0	0	5	0	1
very early, during transformation	1	0	0	very early, during transformation	0	0	0	0	0	0	1	0	0	very early, during transformation	1	0	0	0	0	0	very early, during transformation	0	0	0	1	0	0	0	0	0	very early, during transformation	0	0	0	1	0	0
a metastatic molecular signature is present early	1	0	0	a metastatic molecular signature is present early	1	0	0	0	0	0	0	0	0	a metastatic molecular signature is present early	1	0	0	0	0	0	a metastatic molecular signature is present early	0	0	0	0	0	0	1	0	0	a metastatic molecular signature is present early	1	0	0	0	0	0
it certainly it’s a lot earlier than most people think	1	0	0	it certainly it’s a lot earlier than most people think	1	0	0	0	0	0	0	0	0	it certainly it’s a lot earlier than most people think	0	0	0	1	0	0	it certainly it’s a lot earlier than most people think	0	0	0	0	0	0	1	0	0	it certainly it’s a lot earlier than most people think	1	0	0	0	0	0
for some cancers happens very early that the primary tumor is no longer even identifiable / it can be very early	3	0	0	for some cancers happens very early that the primary tumor is no longer even identifiable / it can be very early	2	0	0	1	0	0	0	0	0	for some cancers happens very early that the primary tumor is no longer even identifiable / it can be very early	2	0	0	1	0	0	for some cancers happens very early that the primary tumor is no longer even identifiable / it can be very early	2	0	0	1	0	0	0	0	0	for some cancers happens very early that the primary tumor is no longer even identifiable / it can be very early	1	0	0	2	0	0
can be differentiated based on their expression profile - some early stage cancers have an expression profile more like a metastatic cancer, and they’re the ones that are going to metastasize	1	0	0	can be differentiated based on their expression profile - some early stage cancers have an expression profile more like a metastatic cancer, and they’re the ones that are going to metastasize	0	0	0	0	0	0	1	0	0	can be differentiated based on their expression profile - some early stage cancers have an expression profile more like a metastatic cancer, and they’re the ones that are going to metastasize	0	0	0	1	0	0	can be differentiated based on their expression profile - some early stage cancers have an expression profile more like a metastatic cancer, and they’re the ones that are going to metastasize	0	0	0	1	0	0	0	0	0	can be differentiated based on their expression profile - some early stage cancers have an expression profile more like a metastatic cancer, and they’re the ones that are going to metastasize	1	0	0	0	0	0
* early in tumor development *	2	0	0	* early in tumor development *	1	0	0	1	0	0	0	0	0	* early in tumor development *	2	0	0	0	0	0	* early in tumor development *	2	0	0	0	0	0	0	0	0	* early in tumor development *	0	0	0	2	0	0
there’s a second opinion, that metastasis can be formed on the very early stages of tumor development, that perhaps some of the primary tumor cells already acquire ability to be disseminated or go to the bloodstream, to survive it, and to infiltrate the specific distant cells	1	0	0	there’s a second opinion, that metastasis can be formed on the very early stages of tumor development, that perhaps some of the primary tumor cells already acquire ability to be disseminated or go to the bloodstream, to survive it, and to infiltrate the specific distant cells	1	0	0	0	0	0	0	0	0	there’s a second opinion, that metastasis can be formed on the very early stages of tumor development, that perhaps some of the primary tumor cells already acquire ability to be disseminated or go to the bloodstream, to survive it, and to infiltrate the specific distant cells	1	0	0	0	0	0	there’s a second opinion, that metastasis can be formed on the very early stages of tumor development, that perhaps some of the primary tumor cells already acquire ability to be disseminated or go to the bloodstream, to survive it, and to infiltrate the specific distant cells	1	0	0	0	0	0	0	0	0	there’s a second opinion, that metastasis can be formed on the very early stages of tumor development, that perhaps some of the primary tumor cells already acquire ability to be disseminated or go to the bloodstream, to survive it, and to infiltrate the specific distant cells	0	0	0	1	0	0
it’s highly likely that early in tumorogenesis, even before you can actually perceive a large primary tumor that it is likely that there has already been metastatic spread	1	0	0	it’s highly likely that early in tumorogenesis, even before you can actually perceive a large primary tumor that it is likely that there has already been metastatic spread	0	0	0	1	0	0	0	0	0	it’s highly likely that early in tumorogenesis, even before you can actually perceive a large primary tumor that it is likely that there has already been metastatic spread	1	0	0	0	0	0	it’s highly likely that early in tumorogenesis, even before you can actually perceive a large primary tumor that it is likely that there has already been metastatic spread	1	0	0	0	0	0	0	0	0	it’s highly likely that early in tumorogenesis, even before you can actually perceive a large primary tumor that it is likely that there has already been metastatic spread	0	0	0	1	0	0
on the part of literature which I know seems that the primary tumor already carry those cells which are more predisposed to metastasize in different versions - of course it’s a restriction determined by models used	1	0	0	on the part of literature which I know seems that the primary tumor already carry those cells which are more predisposed to metastasize in different versions - of course it’s a restriction determined by models used	1	0	0	0	0	0	0	0	0	on the part of literature which I know seems that the primary tumor already carry those cells which are more predisposed to metastasize in different versions - of course it’s a restriction determined by models used	1	0	0	0	0	0	on the part of literature which I know seems that the primary tumor already carry those cells which are more predisposed to metastasize in different versions - of course it’s a restriction determined by models used	1	0	0	0	0	0	0	0	0	on the part of literature which I know seems that the primary tumor already carry those cells which are more predisposed to metastasize in different versions - of course it’s a restriction determined by models used	0	0	0	1	0	0
* during (and late) tumor development *	2	0	0	* during (and late) tumor development *	1	0	0	1	0	0	0	0	0	* during (and late) tumor development *	2	0	0	0	0	0	* during (and late) tumor development *	2	0	0	0	0	0	0	0	0	* during (and late) tumor development *	0	0	0	2	0	0
most tumors acquire their metastatic ability late in the oncogenic mechanism	1	0	0	most tumors acquire their metastatic ability late in the oncogenic mechanism	0	0	0	1	0	0	0	0	0	most tumors acquire their metastatic ability late in the oncogenic mechanism	1	0	0	0	0	0	most tumors acquire their metastatic ability late in the oncogenic mechanism	1	0	0	0	0	0	0	0	0	most tumors acquire their metastatic ability late in the oncogenic mechanism	0	0	0	1	0	0
the major dogma is that metastasis is really, at least connected with a specific stage of the development of tumor	1	0	0	the major dogma is that metastasis is really, at least connected with a specific stage of the development of tumor	1	0	0	0	0	0	0	0	0	the major dogma is that metastasis is really, at least connected with a specific stage of the development of tumor	1	0	0	0	0	0	the major dogma is that metastasis is really, at least connected with a specific stage of the development of tumor	1	0	0	0	0	0	0	0	0	the major dogma is that metastasis is really, at least connected with a specific stage of the development of tumor	0	0	0	1	0	0
* cancer stem cells *	3	4	1	* cancer stem cells *	1	0	0	1	2	1	1	2	0	* cancer stem cells *	3	2	0	0	2	1	* cancer stem cells *	2	1	1	0	2	0	1	1	0	* cancer stem cells *	0	1	0	3	3	1
it happens in stem cells or cells with embyological connection, metastasis develops rapidly	1	0	0	it happens in stem cells or cells with embyological connection, metastasis develops rapidly	0	0	0	0	0	0	1	0	0	it happens in stem cells or cells with embyological connection, metastasis develops rapidly	1	0	0	0	0	0	it happens in stem cells or cells with embyological connection, metastasis develops rapidly	0	0	0	0	0	0	1	0	0	it happens in stem cells or cells with embyological connection, metastasis develops rapidly	0	0	0	1	0	0
there are stem cells, cells that retain some attributes of the stem, a cancer stem cell, not an embryonic stem cell, to metastasize- the cells that have that stem-ness that can actually go to another area and produce more border cells and remain self-replicating	0	1	0	there are stem cells, cells that retain some attributes of the stem, a cancer stem cell, not an embryonic stem cell, to metastasize- the cells that have that stem-ness that can actually go to another area and produce more border cells and remain self-replicating	0	0	0	0	0	0	0	1	0	there are stem cells, cells that retain some attributes of the stem, a cancer stem cell, not an embryonic stem cell, to metastasize- the cells that have that stem-ness that can actually go to another area and produce more border cells and remain self-replicating	0	0	0	0	1	0	there are stem cells, cells that retain some attributes of the stem, a cancer stem cell, not an embryonic stem cell, to metastasize- the cells that have that stem-ness that can actually go to another area and produce more border cells and remain self-replicating	0	0	0	0	1	0	0	0	0	there are stem cells, cells that retain some attributes of the stem, a cancer stem cell, not an embryonic stem cell, to metastasize- the cells that have that stem-ness that can actually go to another area and produce more border cells and remain self-replicating	0	1	0	0	0	0
believers in the tumor stem cell hypothesis, or the tumor initiating-self hypothesis, argue that they have acquired their metastatic potential much earlier but the appropriate environment has not been there for them to actually metastasize	1	0	0	believers in the tumor stem cell hypothesis, or the tumor initiating-self hypothesis, argue that they have acquired their metastatic potential much earlier but the appropriate environment has not been there for them to actually metastasize	0	0	0	1	0	0	0	0	0	believers in the tumor stem cell hypothesis, or the tumor initiating-self hypothesis, argue that they have acquired their metastatic potential much earlier but the appropriate environment has not been there for them to actually metastasize	1	0	0	0	0	0	believers in the tumor stem cell hypothesis, or the tumor initiating-self hypothesis, argue that they have acquired their metastatic potential much earlier but the appropriate environment has not been there for them to actually metastasize	1	0	0	0	0	0	0	0	0	believers in the tumor stem cell hypothesis, or the tumor initiating-self hypothesis, argue that they have acquired their metastatic potential much earlier but the appropriate environment has not been there for them to actually metastasize	0	0	0	1	0	0
if everything is programmed from the stem cells, then we wouldn’t see what we see, where if you look at a prognosis of breast cancer it’s still dependent on the stage	0	0	1	if everything is programmed from the stem cells, then we wouldn’t see what we see, where if you look at a prognosis of breast cancer it’s still dependent on the stage	0	0	0	0	0	1	0	0	0	if everything is programmed from the stem cells, then we wouldn’t see what we see, where if you look at a prognosis of breast cancer it’s still dependent on the stage	0	0	0	0	0	1	if everything is programmed from the stem cells, then we wouldn’t see what we see, where if you look at a prognosis of breast cancer it’s still dependent on the stage	0	0	1	0	0	0	0	0	0	if everything is programmed from the stem cells, then we wouldn’t see what we see, where if you look at a prognosis of breast cancer it’s still dependent on the stage	0	0	0	0	0	1
I’m still not sure whether the stem cell is what’s really causing the metastasis or it’s really the additional genetic or epigenetic changes that allow the cells to acquire the metastatic abilities	0	1	0	I’m still not sure whether the stem cell is what’s really causing the metastasis or it’s really the additional genetic or epigenetic changes that allow the cells to acquire the metastatic abilities	0	0	0	0	1	0	0	0	0	I’m still not sure whether the stem cell is what’s really causing the metastasis or it’s really the additional genetic or epigenetic changes that allow the cells to acquire the metastatic abilities	0	0	0	0	1	0	I’m still not sure whether the stem cell is what’s really causing the metastasis or it’s really the additional genetic or epigenetic changes that allow the cells to acquire the metastatic abilities	0	1	0	0	0	0	0	0	0	I’m still not sure whether the stem cell is what’s really causing the metastasis or it’s really the additional genetic or epigenetic changes that allow the cells to acquire the metastatic abilities	0	0	0	0	1	0
assuming the cancer grows from a single clone, the original cell that had the aberration that turned into cancer also gave it metastatic potential	0	1	0	assuming the cancer grows from a single clone, the original cell that had the aberration that turned into cancer also gave it metastatic potential	0	0	0	0	1	0	0	0	0	assuming the cancer grows from a single clone, the original cell that had the aberration that turned into cancer also gave it metastatic potential	0	1	0	0	0	0	assuming the cancer grows from a single clone, the original cell that had the aberration that turned into cancer also gave it metastatic potential	0	0	0	0	1	0	0	0	0	assuming the cancer grows from a single clone, the original cell that had the aberration that turned into cancer also gave it metastatic potential	0	0	0	0	1	0
very close to normal tissue stem cell stage	0	1	0	very close to normal tissue stem cell stage	0	0	0	0	0	0	0	1	0	very close to normal tissue stem cell stage	0	1	0	0	0	0	very close to normal tissue stem cell stage	0	0	0	0	0	0	0	1	0	very close to normal tissue stem cell stage	0	0	0	0	1	0
if you assume that the tumor arose from a single transformed cell, as you go through cell divisions, subsequent cell divisions are accumulating different mutations, so it looses its clonality relatively early	1	0	0	if you assume that the tumor arose from a single transformed cell, as you go through cell divisions, subsequent cell divisions are accumulating different mutations, so it looses its clonality relatively early	1	0	0	0	0	0	0	0	0	if you assume that the tumor arose from a single transformed cell, as you go through cell divisions, subsequent cell divisions are accumulating different mutations, so it looses its clonality relatively early	1	0	0	0	0	0	if you assume that the tumor arose from a single transformed cell, as you go through cell divisions, subsequent cell divisions are accumulating different mutations, so it looses its clonality relatively early	1	0	0	0	0	0	0	0	0	if you assume that the tumor arose from a single transformed cell, as you go through cell divisions, subsequent cell divisions are accumulating different mutations, so it looses its clonality relatively early	0	0	0	1	0	0
in a cell that have some sort of embryological connection, the transcriptomic profile is different	0	1	0	in a cell that have some sort of embryological connection, the transcriptomic profile is different	0	0	0	0	0	0	0	1	0	in a cell that have some sort of embryological connection, the transcriptomic profile is different	0	1	0	0	0	0	in a cell that have some sort of embryological connection, the transcriptomic profile is different	0	0	0	0	0	0	0	1	0	in a cell that have some sort of embryological connection, the transcriptomic profile is different	0	0	0	0	1	0
* at primary tumor *	4	0	0	* at primary tumor *	4	0	0	0	0	0	0	0	0	* at primary tumor *	2	0	0	2	0	0	* at primary tumor *	1	0	0	2	0	0	1	0	0	* at primary tumor *	1	0	0	3	0	0
at the point where a primary tumor gives cells that acquire the ability to cross through the basement membrane	1	0	0	at the point where a primary tumor gives cells that acquire the ability to cross through the basement membrane	1	0	0	0	0	0	0	0	0	at the point where a primary tumor gives cells that acquire the ability to cross through the basement membrane	1	0	0	0	0	0	at the point where a primary tumor gives cells that acquire the ability to cross through the basement membrane	1	0	0	0	0	0	0	0	0	at the point where a primary tumor gives cells that acquire the ability to cross through the basement membrane	0	0	0	1	0	0
at a time within the primary tumor, not when it is first growing, not when it is very small but when it is outgrowing its blood supply, becoming hypoxic, that the pressure is so strong that the cells acquire other changes that give them a selective advantage and go on to become metastatic	1	0	0	at a time within the primary tumor, not when it is first growing, not when it is very small but when it is outgrowing its blood supply, becoming hypoxic, that the pressure is so strong that the cells acquire other changes that give them a selective advantage and go on to become metastatic	1	0	0	0	0	0	0	0	0	at a time within the primary tumor, not when it is first growing, not when it is very small but when it is outgrowing its blood supply, becoming hypoxic, that the pressure is so strong that the cells acquire other changes that give them a selective advantage and go on to become metastatic	0	0	0	1	0	0	at a time within the primary tumor, not when it is first growing, not when it is very small but when it is outgrowing its blood supply, becoming hypoxic, that the pressure is so strong that the cells acquire other changes that give them a selective advantage and go on to become metastatic	0	0	0	0	0	0	1	0	0	at a time within the primary tumor, not when it is first growing, not when it is very small but when it is outgrowing its blood supply, becoming hypoxic, that the pressure is so strong that the cells acquire other changes that give them a selective advantage and go on to become metastatic	0	0	0	1	0	0
the cells that are able to complete all the steps of the classical metastatic cascade and ultimately are able to undergo progressive growth, get at least part of those abilities at the primary tumor site, with regards to being altered in their growth control	1	0	0	the cells that are able to complete all the steps of the classical metastatic cascade and ultimately are able to undergo progressive growth, get at least part of those abilities at the primary tumor site, with regards to being altered in their growth control	1	0	0	0	0	0	0	0	0	the cells that are able to complete all the steps of the classical metastatic cascade and ultimately are able to undergo progressive growth, get at least part of those abilities at the primary tumor site, with regards to being altered in their growth control	0	0	0	1	0	0	the cells that are able to complete all the steps of the classical metastatic cascade and ultimately are able to undergo progressive growth, get at least part of those abilities at the primary tumor site, with regards to being altered in their growth control	0	0	0	1	0	0	0	0	0	the cells that are able to complete all the steps of the classical metastatic cascade and ultimately are able to undergo progressive growth, get at least part of those abilities at the primary tumor site, with regards to being altered in their growth control	0	0	0	1	0	0
probably a lot of things that happen in the primary tumor, but, I don’t think everything happens there	1	0	0	probably a lot of things that happen in the primary tumor, but, I don’t think everything happens there	1	0	0	0	0	0	0	0	0	probably a lot of things that happen in the primary tumor, but, I don’t think everything happens there	0	0	0	1	0	0	probably a lot of things that happen in the primary tumor, but, I don’t think everything happens there	0	0	0	1	0	0	0	0	0	probably a lot of things that happen in the primary tumor, but, I don’t think everything happens there	0	0	0	1	0	0
some sort of transforming event in the primary tumor and then there is various tests there that it has to pass if it had to ultimately get to another organ or to a lymph node	1	0	0	some sort of transforming event in the primary tumor and then there is various tests there that it has to pass if it had to ultimately get to another organ or to a lymph node	1	0	0	0	0	0	0	0	0	some sort of transforming event in the primary tumor and then there is various tests there that it has to pass if it had to ultimately get to another organ or to a lymph node	1	0	0	0	0	0	some sort of transforming event in the primary tumor and then there is various tests there that it has to pass if it had to ultimately get to another organ or to a lymph node	0	0	0	1	0	0	0	0	0	some sort of transforming event in the primary tumor and then there is various tests there that it has to pass if it had to ultimately get to another organ or to a lymph node	1	0	0	0	0	0
* throughout *	4	0	0	* throughout *	3	0	0	1	0	0	0	0	0	* throughout *	2	0	0	2	0	0	* throughout *	0	0	0	3	0	0	1	0	0	* throughout *	1	0	0	3	0	0
it is constantly acquiring different sort of molecular profiles, and at each of those different stages it gets tested - it’s events that are sort of being acquired through that whole process	1	0	0	it is constantly acquiring different sort of molecular profiles, and at each of those different stages it gets tested - it’s events that are sort of being acquired through that whole process	1	0	0	0	0	0	0	0	0	it is constantly acquiring different sort of molecular profiles, and at each of those different stages it gets tested - it’s events that are sort of being acquired through that whole process	1	0	0	0	0	0	it is constantly acquiring different sort of molecular profiles, and at each of those different stages it gets tested - it’s events that are sort of being acquired through that whole process	0	0	0	1	0	0	0	0	0	it is constantly acquiring different sort of molecular profiles, and at each of those different stages it gets tested - it’s events that are sort of being acquired through that whole process	1	0	0	0	0	0
it’s a process, so there’s more than likely going to be more than one mutation	1	0	0	it’s a process, so there’s more than likely going to be more than one mutation	1	0	0	0	0	0	0	0	0	it’s a process, so there’s more than likely going to be more than one mutation	0	0	0	1	0	0	it’s a process, so there’s more than likely going to be more than one mutation	0	0	0	1	0	0	0	0	0	it’s a process, so there’s more than likely going to be more than one mutation	0	0	0	1	0	0
probably a lot of things that happen in the primary tumor, but, I don’t think everything happens there	1	0	0	probably a lot of things that happen in the primary tumor, but, I don’t think everything happens there	1	0	0	0	0	0	0	0	0	probably a lot of things that happen in the primary tumor, but, I don’t think everything happens there	0	0	0	1	0	0	probably a lot of things that happen in the primary tumor, but, I don’t think everything happens there	0	0	0	1	0	0	0	0	0	probably a lot of things that happen in the primary tumor, but, I don’t think everything happens there	0	0	0	1	0	0
some people would argue that it is a linear progression and you acquire metastatic potential at the end	1	0	0	some people would argue that it is a linear progression and you acquire metastatic potential at the end	1	0	0	0	0	0	0	0	0	some people would argue that it is a linear progression and you acquire metastatic potential at the end	0	0	0	1	0	0	some people would argue that it is a linear progression and you acquire metastatic potential at the end	0	0	0	1	0	0	0	0	0	some people would argue that it is a linear progression and you acquire metastatic potential at the end	0	0	0	1	0	0
some sort of transforming event in the primary tumor and then there is various tests there that it has to pass if it had to ultimately get to another organ or to a lymph node	1	0	0	some sort of transforming event in the primary tumor and then there is various tests there that it has to pass if it had to ultimately get to another organ or to a lymph node	1	0	0	0	0	0	0	0	0	some sort of transforming event in the primary tumor and then there is various tests there that it has to pass if it had to ultimately get to another organ or to a lymph node	1	0	0	0	0	0	some sort of transforming event in the primary tumor and then there is various tests there that it has to pass if it had to ultimately get to another organ or to a lymph node	0	0	0	1	0	0	0	0	0	some sort of transforming event in the primary tumor and then there is various tests there that it has to pass if it had to ultimately get to another organ or to a lymph node	1	0	0	0	0	0
it’s only at the ultimate stage, which would be the establishment of metastasis, of actual cells in another location, that it has actually successfully done that	1	0	0	it’s only at the ultimate stage, which would be the establishment of metastasis, of actual cells in another location, that it has actually successfully done that	1	0	0	0	0	0	0	0	0	it’s only at the ultimate stage, which would be the establishment of metastasis, of actual cells in another location, that it has actually successfully done that	1	0	0	0	0	0	it’s only at the ultimate stage, which would be the establishment of metastasis, of actual cells in another location, that it has actually successfully done that	0	0	0	1	0	0	0	0	0	it’s only at the ultimate stage, which would be the establishment of metastasis, of actual cells in another location, that it has actually successfully done that	1	0	0	0	0	0
some cells have the capability of mutation from as soon as they have the definition of a cancer, that is that they can invade locally, grow at that exact point of time	1	0	0	some cells have the capability of mutation from as soon as they have the definition of a cancer, that is that they can invade locally, grow at that exact point of time	0	0	0	1	0	0	0	0	0	some cells have the capability of mutation from as soon as they have the definition of a cancer, that is that they can invade locally, grow at that exact point of time	1	0	0	0	0	0	some cells have the capability of mutation from as soon as they have the definition of a cancer, that is that they can invade locally, grow at that exact point of time	0	0	0	0	0	0	1	0	0	some cells have the capability of mutation from as soon as they have the definition of a cancer, that is that they can invade locally, grow at that exact point of time	0	0	0	1	0	0
* when needed - selective pressure *	1	0	0	* when needed - selective pressure *	1	0	0	0	0	0	0	0	0	* when needed - selective pressure *	0	0	0	1	0	0	* when needed - selective pressure *	0	0	0	0	0	0	1	0	0	* when needed - selective pressure *	0	0	0	1	0	0
tumor cells are smart and they wouldn’t have properties early on that are only important in metastasis if they didn’t need them, so I think that they don’t acquire these changes until they need them	1	0	0	tumor cells are smart and they wouldn’t have properties early on that are only important in metastasis if they didn’t need them, so I think that they don’t acquire these changes until they need them	1	0	0	0	0	0	0	0	0	tumor cells are smart and they wouldn’t have properties early on that are only important in metastasis if they didn’t need them, so I think that they don’t acquire these changes until they need them	0	0	0	1	0	0	tumor cells are smart and they wouldn’t have properties early on that are only important in metastasis if they didn’t need them, so I think that they don’t acquire these changes until they need them	0	0	0	0	0	0	1	0	0	tumor cells are smart and they wouldn’t have properties early on that are only important in metastasis if they didn’t need them, so I think that they don’t acquire these changes until they need them	0	0	0	1	0	0
tumor cells acquire these changes later when they under some selective pressure to get out, dodge…	1	0	0	tumor cells acquire these changes later when they under some selective pressure to get out, dodge…	1	0	0	0	0	0	0	0	0	tumor cells acquire these changes later when they under some selective pressure to get out, dodge…	0	0	0	1	0	0	tumor cells acquire these changes later when they under some selective pressure to get out, dodge…	0	0	0	0	0	0	1	0	0	tumor cells acquire these changes later when they under some selective pressure to get out, dodge…	0	0	0	1	0	0
* pre-present but additional changes needed *	6	0	0	* pre-present but additional changes needed *	3	0	0	1	0	0	2	0	0	* pre-present but additional changes needed *	2	0	0	4	0	0	* pre-present but additional changes needed *	0	0	0	5	0	0	1	0	0	* pre-present but additional changes needed *	3	0	0	3	0	0
pre-present, but that’s not say that additional mutations aren’t important	1	0	0	pre-present, but that’s not say that additional mutations aren’t important	1	0	0	0	0	0	0	0	0	pre-present, but that’s not say that additional mutations aren’t important	0	0	0	1	0	0	pre-present, but that’s not say that additional mutations aren’t important	0	0	0	0	0	0	1	0	0	pre-present, but that’s not say that additional mutations aren’t important	1	0	0	0	0	0
there are subsets of patients extremely susceptible to metastasis based to germline inheritance, and in those patients cells acquire the ability to complete the metastatic process probably fairly early because the barriers for them to doing so is fairly low	1	0	0	there are subsets of patients extremely susceptible to metastasis based to germline inheritance, and in those patients cells acquire the ability to complete the metastatic process probably fairly early because the barriers for them to doing so is fairly low	1	0	0	0	0	0	0	0	0	there are subsets of patients extremely susceptible to metastasis based to germline inheritance, and in those patients cells acquire the ability to complete the metastatic process probably fairly early because the barriers for them to doing so is fairly low	1	0	0	0	0	0	there are subsets of patients extremely susceptible to metastasis based to germline inheritance, and in those patients cells acquire the ability to complete the metastatic process probably fairly early because the barriers for them to doing so is fairly low	0	0	0	1	0	0	0	0	0	there are subsets of patients extremely susceptible to metastasis based to germline inheritance, and in those patients cells acquire the ability to complete the metastatic process probably fairly early because the barriers for them to doing so is fairly low	1	0	0	0	0	0
all human cancers require multiple multiple mutations, likely that the early genetic events will influence, while a late genetic event will cause metastasis or not	1	0	0	all human cancers require multiple multiple mutations, likely that the early genetic events will influence, while a late genetic event will cause metastasis or not	1	0	0	0	0	0	0	0	0	all human cancers require multiple multiple mutations, likely that the early genetic events will influence, while a late genetic event will cause metastasis or not	0	0	0	1	0	0	all human cancers require multiple multiple mutations, likely that the early genetic events will influence, while a late genetic event will cause metastasis or not	0	0	0	1	0	0	0	0	0	all human cancers require multiple multiple mutations, likely that the early genetic events will influence, while a late genetic event will cause metastasis or not	0	0	0	1	0	0
changes happening at an early stage is setting the ground-work for an event later to be able to promote metastasis - separating those two things out is very difficult	1	0	0	changes happening at an early stage is setting the ground-work for an event later to be able to promote metastasis - separating those two things out is very difficult	1	0	0	0	0	0	0	0	0	changes happening at an early stage is setting the ground-work for an event later to be able to promote metastasis - separating those two things out is very difficult	0	0	0	1	0	0	changes happening at an early stage is setting the ground-work for an event later to be able to promote metastasis - separating those two things out is very difficult	0	0	0	1	0	0	0	0	0	changes happening at an early stage is setting the ground-work for an event later to be able to promote metastasis - separating those two things out is very difficult	0	0	0	1	0	0
the genetic chances are acquired early, in the genesis of the cancer, but there are other environmental things that occur that make the time and perhaps the extend of spread	1	0	0	the genetic chances are acquired early, in the genesis of the cancer, but there are other environmental things that occur that make the time and perhaps the extend of spread	0	0	0	0	0	0	1	0	0	the genetic chances are acquired early, in the genesis of the cancer, but there are other environmental things that occur that make the time and perhaps the extend of spread	0	0	0	1	0	0	the genetic chances are acquired early, in the genesis of the cancer, but there are other environmental things that occur that make the time and perhaps the extend of spread	0	0	0	1	0	0	0	0	0	the genetic chances are acquired early, in the genesis of the cancer, but there are other environmental things that occur that make the time and perhaps the extend of spread	1	0	0	0	0	0
metastatic efficiency increases, but the ability to metastasize is inherent in every cancer cell	1	0	0	metastatic efficiency increases, but the ability to metastasize is inherent in every cancer cell	0	0	0	0	0	0	1	0	0	metastatic efficiency increases, but the ability to metastasize is inherent in every cancer cell	1	0	0	0	0	0	metastatic efficiency increases, but the ability to metastasize is inherent in every cancer cell	0	0	0	1	0	0	0	0	0	metastatic efficiency increases, but the ability to metastasize is inherent in every cancer cell	0	0	0	1	0	0
there are multiple cells that already have these tumor initiating phenotypes, because it’s such a high association with metastatic disease, those cells also acquire the ability to go on, to undergo all these steps of metastasis	1	0	0	there are multiple cells that already have these tumor initiating phenotypes, because it’s such a high association with metastatic disease, those cells also acquire the ability to go on, to undergo all these steps of metastasis	0	0	0	1	0	0	0	0	0	there are multiple cells that already have these tumor initiating phenotypes, because it’s such a high association with metastatic disease, those cells also acquire the ability to go on, to undergo all these steps of metastasis	0	0	0	1	0	0	there are multiple cells that already have these tumor initiating phenotypes, because it’s such a high association with metastatic disease, those cells also acquire the ability to go on, to undergo all these steps of metastasis	0	0	0	1	0	0	0	0	0	there are multiple cells that already have these tumor initiating phenotypes, because it’s such a high association with metastatic disease, those cells also acquire the ability to go on, to undergo all these steps of metastasis	0	0	0	1	0	0
* spectrum-varies *	9	1	0	* spectrum-varies *	4	1	0	2	0	0	3	0	0	* spectrum-varies *	8	1	0	1	0	0	* spectrum-varies *	3	1	0	3	0	0	3	0	0	* spectrum-varies *	4	0	0	5	1	0
the answer is a spectrum / it varies from cancer to cancer	4	0	0	the answer is a spectrum / it varies from cancer to cancer	1	0	0	1	0	0	2	0	0	the answer is a spectrum / it varies from cancer to cancer	3	0	0	1	0	0	the answer is a spectrum / it varies from cancer to cancer	2	0	0	0	0	0	2	0	0	the answer is a spectrum / it varies from cancer to cancer	2	0	0	2	0	0
the majority of cancers probably fall somewhere in between	1	0	0	the majority of cancers probably fall somewhere in between	0	0	0	0	0	0	1	0	0	the majority of cancers probably fall somewhere in between	1	0	0	0	0	0	the majority of cancers probably fall somewhere in between	0	0	0	0	0	0	1	0	0	the majority of cancers probably fall somewhere in between	0	0	0	1	0	0
there are some cancers that metastasize very early on, have a proficiency to metastasize and some don’t / others do that very early in tumor formation	2	0	0	there are some cancers that metastasize very early on, have a proficiency to metastasize and some don’t / others do that very early in tumor formation	1	0	0	1	0	0	0	0	0	there are some cancers that metastasize very early on, have a proficiency to metastasize and some don’t / others do that very early in tumor formation	2	0	0	0	0	0	there are some cancers that metastasize very early on, have a proficiency to metastasize and some don’t / others do that very early in tumor formation	1	0	0	1	0	0	0	0	0	there are some cancers that metastasize very early on, have a proficiency to metastasize and some don’t / others do that very early in tumor formation	1	0	0	1	0	0
for some cancers it doesn’t happen at all / some tumors never support metastasis	2	0	0	for some cancers it doesn’t happen at all / some tumors never support metastasis	1	0	0	1	0	0	0	0	0	for some cancers it doesn’t happen at all / some tumors never support metastasis	2	0	0	0	0	0	for some cancers it doesn’t happen at all / some tumors never support metastasis	1	0	0	1	0	0	0	0	0	for some cancers it doesn’t happen at all / some tumors never support metastasis	1	0	0	1	0	0
tumors are either aggressive and metastatic or are not	1	0	0	tumors are either aggressive and metastatic or are not	0	0	0	0	0	0	1	0	0	tumors are either aggressive and metastatic or are not	1	0	0	0	0	0	tumors are either aggressive and metastatic or are not	0	0	0	0	0	0	1	0	0	tumors are either aggressive and metastatic or are not	0	0	0	1	0	0
we haven’t understood the difference between cancers that metastasize, early, late and not at all	1	0	0	we haven’t understood the difference between cancers that metastasize, early, late and not at all	1	0	0	0	0	0	0	0	0	we haven’t understood the difference between cancers that metastasize, early, late and not at all	1	0	0	0	0	0	we haven’t understood the difference between cancers that metastasize, early, late and not at all	1	0	0	0	0	0	0	0	0	we haven’t understood the difference between cancers that metastasize, early, late and not at all	1	0	0	0	0	0
it could be at any stage	0	1	0	it could be at any stage	0	1	0	0	0	0	0	0	0	it could be at any stage	0	1	0	0	0	0	it could be at any stage	0	1	0	0	0	0	0	0	0	it could be at any stage	0	0	0	0	1	0
for some cancers happens very late / others after a certain point start to form metastasis	2	0	0	for some cancers happens very late / others after a certain point start to form metastasis	1	0	0	1	0	0	0	0	0	for some cancers happens very late / others after a certain point start to form metastasis	2	0	0	0	0	0	for some cancers happens very late / others after a certain point start to form metastasis	1	0	0	1	0	0	0	0	0	for some cancers happens very late / others after a certain point start to form metastasis	1	0	0	1	0	0
there are patients who based on their particular inherited physiology are at very low risk of this ever happening – so chances of the tumors actually acquiring all the capacity is minimal because the barriers in these cases are extremely high	1	0	0	there are patients who based on their particular inherited physiology are at very low risk of this ever happening – so chances of the tumors actually acquiring all the capacity is minimal because the barriers in these cases are extremely high	1	0	0	0	0	0	0	0	0	there are patients who based on their particular inherited physiology are at very low risk of this ever happening – so chances of the tumors actually acquiring all the capacity is minimal because the barriers in these cases are extremely high	1	0	0	0	0	0	there are patients who based on their particular inherited physiology are at very low risk of this ever happening – so chances of the tumors actually acquiring all the capacity is minimal because the barriers in these cases are extremely high	0	0	0	1	0	0	0	0	0	there are patients who based on their particular inherited physiology are at very low risk of this ever happening – so chances of the tumors actually acquiring all the capacity is minimal because the barriers in these cases are extremely high	1	0	0	0	0	0
do not have a clear answer because it can go either way	1	0	0	do not have a clear answer because it can go either way	1	0	0	0	0	0	0	0	0	do not have a clear answer because it can go either way	1	0	0	0	0	0	do not have a clear answer because it can go either way	0	0	0	1	0	0	0	0	0	do not have a clear answer because it can go either way	0	0	0	1	0	0
* either early or after a mutation *	3	0	0	* either early or after a mutation *	3	0	0	0	0	0	0	0	0	* either early or after a mutation *	1	0	0	2	0	0	* either early or after a mutation *	2	0	0	0	0	0	1	0	0	* either early or after a mutation *	2	0	0	1	0	0
there are 2 paradigms: one in which the cancer cell has the ability right from the very start, and another in which the cancer cell may mutate to acquire the ability	1	0	0	there are 2 paradigms: one in which the cancer cell has the ability right from the very start, and another in which the cancer cell may mutate to acquire the ability	1	0	0	0	0	0	0	0	0	there are 2 paradigms: one in which the cancer cell has the ability right from the very start, and another in which the cancer cell may mutate to acquire the ability	0	0	0	1	0	0	there are 2 paradigms: one in which the cancer cell has the ability right from the very start, and another in which the cancer cell may mutate to acquire the ability	0	0	0	0	0	0	1	0	0	there are 2 paradigms: one in which the cancer cell has the ability right from the very start, and another in which the cancer cell may mutate to acquire the ability	1	0	0	0	0	0
as soon as they are being created or after a mutation	1	0	0	as soon as they are being created or after a mutation	1	0	0	0	0	0	0	0	0	as soon as they are being created or after a mutation	1	0	0	0	0	0	as soon as they are being created or after a mutation	1	0	0	0	0	0	0	0	0	as soon as they are being created or after a mutation	0	0	0	1	0	0
there’s evidence that both of those processes/paradigms are true	1	0	0	there’s evidence that both of those processes/paradigms are true	1	0	0	0	0	0	0	0	0	there’s evidence that both of those processes/paradigms are true	0	0	0	1	0	0	there’s evidence that both of those processes/paradigms are true	0	0	0	0	0	0	1	0	0	there’s evidence that both of those processes/paradigms are true	1	0	0	0	0	0
depends on when it gets together all the abilities it needs to complete this whole process, and so it might have all the mutations or changes in gene expression that it needs early on, or it might have to evolve and get them	1	0	0	depends on when it gets together all the abilities it needs to complete this whole process, and so it might have all the mutations or changes in gene expression that it needs early on, or it might have to evolve and get them	1	0	0	0	0	0	0	0	0	depends on when it gets together all the abilities it needs to complete this whole process, and so it might have all the mutations or changes in gene expression that it needs early on, or it might have to evolve and get them	0	0	0	1	0	0	depends on when it gets together all the abilities it needs to complete this whole process, and so it might have all the mutations or changes in gene expression that it needs early on, or it might have to evolve and get them	1	0	0	0	0	0	0	0	0	depends on when it gets together all the abilities it needs to complete this whole process, and so it might have all the mutations or changes in gene expression that it needs early on, or it might have to evolve and get them	1	0	0	0	0	0
* after mutations *	3	1	0	* after mutations *	2	0	0	1	1	0	0	0	0	* after mutations *	2	0	0	1	1	0	* after mutations *	1	1	0	1	0	0	1	0	0	* after mutations *	0	0	0	3	1	0
after a mutation	1	0	0	after a mutation	1	0	0	0	0	0	0	0	0	after a mutation	1	0	0	0	0	0	after a mutation	1	0	0	0	0	0	0	0	0	after a mutation	0	0	0	1	0	0
mutations that can happen early on will influence whether you get metastasis or not.	1	0	0	mutations that can happen early on will influence whether you get metastasis or not.	1	0	0	0	0	0	0	0	0	mutations that can happen early on will influence whether you get metastasis or not.	0	0	0	1	0	0	mutations that can happen early on will influence whether you get metastasis or not.	0	0	0	1	0	0	0	0	0	mutations that can happen early on will influence whether you get metastasis or not.	0	0	0	1	0	0
metastasis mutations don't necessarily need to happen early on	1	0	0	metastasis mutations don't necessarily need to happen early on	1	0	0	0	0	0	0	0	0	metastasis mutations don't necessarily need to happen early on	0	0	0	1	0	0	metastasis mutations don't necessarily need to happen early on	0	0	0	1	0	0	0	0	0	metastasis mutations don't necessarily need to happen early on	0	0	0	1	0	0
I’m still not sure whether the stem cell is what’s really causing the metastasis or it’s really the additional genetic or epigenetic changes that allow the cells to acquire the metastatic abilities	0	1	0	I’m still not sure whether the stem cell is what’s really causing the metastasis or it’s really the additional genetic or epigenetic changes that allow the cells to acquire the metastatic abilities	0	0	0	0	1	0	0	0	0	I’m still not sure whether the stem cell is what’s really causing the metastasis or it’s really the additional genetic or epigenetic changes that allow the cells to acquire the metastatic abilities	0	0	0	0	1	0	I’m still not sure whether the stem cell is what’s really causing the metastasis or it’s really the additional genetic or epigenetic changes that allow the cells to acquire the metastatic abilities	0	1	0	0	0	0	0	0	0	I’m still not sure whether the stem cell is what’s really causing the metastasis or it’s really the additional genetic or epigenetic changes that allow the cells to acquire the metastatic abilities	0	0	0	0	1	0
some cells have the capability of mutation from as soon as they have the definition of a cancer, that is that they can invade locally, grow at that exact point of time	1	0	0	some cells have the capability of mutation from as soon as they have the definition of a cancer, that is that they can invade locally, grow at that exact point of time	0	0	0	1	0	0	0	0	0	some cells have the capability of mutation from as soon as they have the definition of a cancer, that is that they can invade locally, grow at that exact point of time	1	0	0	0	0	0	some cells have the capability of mutation from as soon as they have the definition of a cancer, that is that they can invade locally, grow at that exact point of time	0	0	0	0	0	0	1	0	0	some cells have the capability of mutation from as soon as they have the definition of a cancer, that is that they can invade locally, grow at that exact point of time	0	0	0	1	0	0
others cells require all the different factors regarding growth, the adverse conditions the environment, the tumor environmental changes, the genetic instability to gain the mutations to go	1	0	0	others cells require all the different factors regarding growth, the adverse conditions the environment, the tumor environmental changes, the genetic instability to gain the mutations to go	0	0	0	1	0	0	0	0	0	others cells require all the different factors regarding growth, the adverse conditions the environment, the tumor environmental changes, the genetic instability to gain the mutations to go	1	0	0	0	0	0	others cells require all the different factors regarding growth, the adverse conditions the environment, the tumor environmental changes, the genetic instability to gain the mutations to go	0	0	0	0	0	0	1	0	0	others cells require all the different factors regarding growth, the adverse conditions the environment, the tumor environmental changes, the genetic instability to gain the mutations to go	0	0	0	1	0	0
* don't know *	6	0	0	* don't know *	3	0	0	1	0	0	2	0	0	* don't know *	3	0	0	3	0	0	* don't know *	4	0	0	2	0	0	0	0	0	* don't know *	2	0	0	4	0	0
very controversial point	1	0	0	very controversial point	1	0	0	0	0	0	0	0	0	very controversial point	0	0	0	1	0	0	very controversial point	0	0	0	1	0	0	0	0	0	very controversial point	0	0	0	1	0	0
we don’t know	4	0	0	we don’t know	1	0	0	1	0	0	2	0	0	we don’t know	2	0	0	2	0	0	we don’t know	3	0	0	1	0	0	0	0	0	we don’t know	2	0	0	2	0	0
a little bit of a random event	1	0	0	a little bit of a random event	1	0	0	0	0	0	0	0	0	a little bit of a random event	1	0	0	0	0	0	a little bit of a random event	1	0	0	0	0	0	0	0	0	a little bit of a random event	0	0	0	1	0	0
there are two extremes points of view to choose, but we simply don’t have enough information for them	1	0	0	there are two extremes points of view to choose, but we simply don’t have enough information for them	1	0	0	0	0	0	0	0	0	there are two extremes points of view to choose, but we simply don’t have enough information for them	1	0	0	0	0	0	there are two extremes points of view to choose, but we simply don’t have enough information for them	1	0	0	0	0	0	0	0	0	there are two extremes points of view to choose, but we simply don’t have enough information for them	0	0	0	1	0	0
I’m still not sure whether the stem cell is what’s really causing the metastasis or it’s really the additional genetic or epigenetic changes that allow the cells to acquire the metastatic abilities	1	0	0	I’m still not sure whether the stem cell is what’s really causing the metastasis or it’s really the additional genetic or epigenetic changes that allow the cells to acquire the metastatic abilities	0	0	0	1	0	0	0	0	0	I’m still not sure whether the stem cell is what’s really causing the metastasis or it’s really the additional genetic or epigenetic changes that allow the cells to acquire the metastatic abilities	0	0	0	1	0	0	I’m still not sure whether the stem cell is what’s really causing the metastasis or it’s really the additional genetic or epigenetic changes that allow the cells to acquire the metastatic abilities	1	0	0	0	0	0	0	0	0	I’m still not sure whether the stem cell is what’s really causing the metastasis or it’s really the additional genetic or epigenetic changes that allow the cells to acquire the metastatic abilities	0	0	0	1	0	0
* other *	1	0	0	* other *	1	0	0	0	0	0	0	0	0	* other *	0	0	0	1	0	0	* other *	0	0	0	0	0	0	1	0	0	* other *	0	0	0	1	0	0
if there are metastases present and we cannot find the primary, I think that the primary either underwent some additional changes and the tumor cells necrozed, apoptozed, or it was actually a very small primary	1	0	0	if there are metastases present and we cannot find the primary, I think that the primary either underwent some additional changes and the tumor cells necrozed, apoptozed, or it was actually a very small primary	1	0	0	0	0	0	0	0	0	if there are metastases present and we cannot find the primary, I think that the primary either underwent some additional changes and the tumor cells necrozed, apoptozed, or it was actually a very small primary	0	0	0	1	0	0	if there are metastases present and we cannot find the primary, I think that the primary either underwent some additional changes and the tumor cells necrozed, apoptozed, or it was actually a very small primary	0	0	0	0	0	0	1	0	0	if there are metastases present and we cannot find the primary, I think that the primary either underwent some additional changes and the tumor cells necrozed, apoptozed, or it was actually a very small primary	0	0	0	1	0	0
WHICH CELLS	7	1	0	WHICH CELLS	4	0	0	2	0	0	1	1	0	WHICH CELLS	6	1	0	1	0	0	WHICH CELLS	2	0	0	2	0	0	3	1	0	WHICH CELLS	2	0	0	5	1	0
* some cells *	4	1	0	* some cells *	4	0	0	0	0	0	0	1	0	* some cells *	3	1	0	1	0	0	* some cells *	2	0	0	0	0	0	2	1	0	* some cells *	2	0	0	2	1	0
present early but only in a subset of cells, probably the stem cells of the cancer	1	0	0	present early but only in a subset of cells, probably the stem cells of the cancer	1	0	0	0	0	0	0	0	0	present early but only in a subset of cells, probably the stem cells of the cancer	1	0	0	0	0	0	present early but only in a subset of cells, probably the stem cells of the cancer	0	0	0	0	0	0	1	0	0	present early but only in a subset of cells, probably the stem cells of the cancer	1	0	0	0	0	0
you would assume that only a small percentage of cells have the ability to be more aggressive from the beginning	1	0	0	you would assume that only a small percentage of cells have the ability to be more aggressive from the beginning	1	0	0	0	0	0	0	0	0	you would assume that only a small percentage of cells have the ability to be more aggressive from the beginning	1	0	0	0	0	0	you would assume that only a small percentage of cells have the ability to be more aggressive from the beginning	1	0	0	0	0	0	0	0	0	you would assume that only a small percentage of cells have the ability to be more aggressive from the beginning	0	0	0	1	0	0
certain cells within a tumor are more metastatic, because they have acquired that particular signature	1	0	0	certain cells within a tumor are more metastatic, because they have acquired that particular signature	1	0	0	0	0	0	0	0	0	certain cells within a tumor are more metastatic, because they have acquired that particular signature	1	0	0	0	0	0	certain cells within a tumor are more metastatic, because they have acquired that particular signature	0	0	0	0	0	0	1	0	0	certain cells within a tumor are more metastatic, because they have acquired that particular signature	1	0	0	0	0	0
some of the cells within the primary tumor that are under pressure	1	0	0	some of the cells within the primary tumor that are under pressure	1	0	0	0	0	0	0	0	0	some of the cells within the primary tumor that are under pressure	0	0	0	1	0	0	some of the cells within the primary tumor that are under pressure	0	0	0	0	0	0	1	0	0	some of the cells within the primary tumor that are under pressure	0	0	0	1	0	0
tumors are heterogeneous collection of cells and tissues, a very very small proportion of those cells are metastatic	1	0	0	tumors are heterogeneous collection of cells and tissues, a very very small proportion of those cells are metastatic	1	0	0	0	0	0	0	0	0	tumors are heterogeneous collection of cells and tissues, a very very small proportion of those cells are metastatic	1	0	0	0	0	0	tumors are heterogeneous collection of cells and tissues, a very very small proportion of those cells are metastatic	0	0	0	0	0	0	1	0	0	tumors are heterogeneous collection of cells and tissues, a very very small proportion of those cells are metastatic	1	0	0	0	0	0
in a cell that have some sort of embryological connection, the transcriptomic profile is different	0	1	0	in a cell that have some sort of embryological connection, the transcriptomic profile is different	0	0	0	0	0	0	0	1	0	in a cell that have some sort of embryological connection, the transcriptomic profile is different	0	1	0	0	0	0	in a cell that have some sort of embryological connection, the transcriptomic profile is different	0	0	0	0	0	0	0	1	0	in a cell that have some sort of embryological connection, the transcriptomic profile is different	0	0	0	0	1	0
within the tumor, certain cells will be subject to different conditions than other cells - they all have the same genetic mutations, that were present in the very initiating event of the cancer, but they were subject to different micro-environmental pressures - some of those cells, because of the environment they find themselves in, now adopt pro-metastasis gene expression program	1	0	0	within the tumor, certain cells will be subject to different conditions than other cells - they all have the same genetic mutations, that were present in the very initiating event of the cancer, but they were subject to different micro-environmental pressures - some of those cells, because of the environment they find themselves in, now adopt pro-metastasis gene expression program	1	0	0	0	0	0	0	0	0	within the tumor, certain cells will be subject to different conditions than other cells - they all have the same genetic mutations, that were present in the very initiating event of the cancer, but they were subject to different micro-environmental pressures - some of those cells, because of the environment they find themselves in, now adopt pro-metastasis gene expression program	1	0	0	0	0	0	within the tumor, certain cells will be subject to different conditions than other cells - they all have the same genetic mutations, that were present in the very initiating event of the cancer, but they were subject to different micro-environmental pressures - some of those cells, because of the environment they find themselves in, now adopt pro-metastasis gene expression program	1	0	0	0	0	0	0	0	0	within the tumor, certain cells will be subject to different conditions than other cells - they all have the same genetic mutations, that were present in the very initiating event of the cancer, but they were subject to different micro-environmental pressures - some of those cells, because of the environment they find themselves in, now adopt pro-metastasis gene expression program	1	0	0	0	0	0
those cells then have the propensity to move away from the primary tumor into the surrounding tissue - those metastasizing cells will be non-dividing, and highly invasive	1	0	0	those cells then have the propensity to move away from the primary tumor into the surrounding tissue - those metastasizing cells will be non-dividing, and highly invasive	1	0	0	0	0	0	0	0	0	those cells then have the propensity to move away from the primary tumor into the surrounding tissue - those metastasizing cells will be non-dividing, and highly invasive	1	0	0	0	0	0	those cells then have the propensity to move away from the primary tumor into the surrounding tissue - those metastasizing cells will be non-dividing, and highly invasive	1	0	0	0	0	0	0	0	0	those cells then have the propensity to move away from the primary tumor into the surrounding tissue - those metastasizing cells will be non-dividing, and highly invasive	1	0	0	0	0	0
* all cells *	2	0	0	* all cells *	0	0	0	2	0	0	0	0	0	* all cells *	2	0	0	0	0	0	* all cells *	0	0	0	1	0	0	1	0	0	* all cells *	0	0	0	2	0	0
all tumor cells have the ability to metastasize	1	0	0	all tumor cells have the ability to metastasize	0	0	0	1	0	0	0	0	0	all tumor cells have the ability to metastasize	1	0	0	0	0	0	all tumor cells have the ability to metastasize	0	0	0	0	0	0	1	0	0	all tumor cells have the ability to metastasize	0	0	0	1	0	0
all cells in a tumor can be metastatic	1	0	0	all cells in a tumor can be metastatic	0	0	0	1	0	0	0	0	0	all cells in a tumor can be metastatic	1	0	0	0	0	0	all cells in a tumor can be metastatic	0	0	0	1	0	0	0	0	0	all cells in a tumor can be metastatic	0	0	0	1	0	0
* all cells could but only some do *	1	0	0	* all cells could but only some do *	0	0	0	0	0	0	1	0	0	* all cells could but only some do *	1	0	0	0	0	0	* all cells could but only some do *	0	0	0	1	0	0	0	0	0	* all cells could but only some do *	0	0	0	1	0	0
metastatic efficiency increases, but the ability to metastasize is inherent in every cancer cell	1	0	0	metastatic efficiency increases, but the ability to metastasize is inherent in every cancer cell	0	0	0	0	0	0	1	0	0	metastatic efficiency increases, but the ability to metastasize is inherent in every cancer cell	1	0	0	0	0	0	metastatic efficiency increases, but the ability to metastasize is inherent in every cancer cell	0	0	0	1	0	0	0	0	0	metastatic efficiency increases, but the ability to metastasize is inherent in every cancer cell	0	0	0	1	0	0
DEPENDS ON	19	5	3	DEPENDS ON	10	1	1	6	2	1	3	2	1	DEPENDS ON	13	3	3	6	2	0	DEPENDS ON	7	3	1	8	0	0	4	2	2	DEPENDS ON	9	1	2	10	4	1
* cell type *	5	1	0	* cell type *	2	0	0	1	0	0	2	1	0	* cell type *	4	1	0	1	0	0	* cell type *	2	0	0	3	0	0	0	1	0	* cell type *	3	0	0	2	1	0
cell origin / cancer cell / original cancer cell / cancer / cancer tissue	5	1	0	cell origin / cancer cell / original cancer cell / cancer / cancer tissue	2	0	0	1	0	0	2	1	0	cell origin / cancer cell / original cancer cell / cancer / cancer tissue	4	1	0	1	0	0	cell origin / cancer cell / original cancer cell / cancer / cancer tissue	2	0	0	3	0	0	0	1	0	cell origin / cancer cell / original cancer cell / cancer / cancer tissue	3	0	0	2	1	0
* tumor type, size, stage *	7	1	3	* tumor type, size, stage *	2	0	1	4	1	1	1	0	1	* tumor type, size, stage *	6	1	3	1	0	0	* tumor type, size, stage *	4	1	1	1	0	0	2	0	2	* tumor type, size, stage *	2	0	2	5	1	1
type of tumor	3	0	0	type of tumor	1	0	0	2	0	0	0	0	0	type of tumor	3	0	0	0	0	0	type of tumor	2	0	0	1	0	0	0	0	0	type of tumor	1	0	0	2	0	0
tumor stage	1	1	0	tumor stage	0	0	0	1	1	0	0	0	0	tumor stage	0	1	0	1	0	0	tumor stage	1	1	0	0	0	0	0	0	0	tumor stage	0	0	0	1	1	0
some are successful because of numbers	1	0	0	some are successful because of numbers	0	0	0	1	0	0	0	0	0	some are successful because of numbers	1	0	0	0	0	0	some are successful because of numbers	0	0	0	0	0	0	1	0	0	some are successful because of numbers	0	0	0	1	0	0
the tumor size	0	0	3	the tumor size	0	0	1	0	0	1	0	0	1	the tumor size	0	0	3	0	0	0	the tumor size	0	0	1	0	0	0	0	0	2	the tumor size	0	0	2	0	0	1
traditionally thought it was the size that determines whether a tumor metastasizes or not	1	0	0	traditionally thought it was the size that determines whether a tumor metastasizes or not	0	0	0	1	0	0	0	0	0	traditionally thought it was the size that determines whether a tumor metastasizes or not	0	0	0	1	0	0	traditionally thought it was the size that determines whether a tumor metastasizes or not	1	0	0	0	0	0	0	0	0	traditionally thought it was the size that determines whether a tumor metastasizes or not	0	0	0	1	0	0
for some tumors depends on the tumor size	3	0	0	for some tumors depends on the tumor size	1	0	0	1	0	0	1	0	0	for some tumors depends on the tumor size	3	0	0	0	0	0	for some tumors depends on the tumor size	1	0	0	0	0	0	2	0	0	for some tumors depends on the tumor size	1	0	0	2	0	0
* organ, site *	1	0	0	* organ, site *	0	0	0	1	0	0	0	0	0	* organ, site *	1	0	0	0	0	0	* organ, site *	0	0	0	0	0	0	1	0	0	* organ, site *	0	0	0	1	0	0
organ specific	1	0	0	organ specific	0	0	0	1	0	0	0	0	0	organ specific	1	0	0	0	0	0	organ specific	0	0	0	0	0	0	1	0	0	organ specific	0	0	0	1	0	0
* tissue, stroma, microenvironment *	5	1	0	* tissue, stroma, microenvironment *	3	0	0	1	0	0	1	1	0	* tissue, stroma, microenvironment *	3	1	0	2	0	0	* tissue, stroma, microenvironment *	2	1	0	2	0	0	1	0	0	* tissue, stroma, microenvironment *	4	1	0	1	0	0
tissue	1	0	0	tissue	0	0	0	1	0	0	0	0	0	tissue	1	0	0	0	0	0	tissue	0	0	0	0	0	0	1	0	0	tissue	0	0	0	1	0	0
cell's environment / surrounding tissue / host	3	1	0	cell's environment / surrounding tissue / host	2	0	0	0	0	0	1	1	0	cell's environment / surrounding tissue / host	1	1	0	2	0	0	cell's environment / surrounding tissue / host	2	1	0	1	0	0	0	0	0	cell's environment / surrounding tissue / host	3	1	0	0	0	0
stroma	1	1	0	stroma	0	0	0	0	0	0	1	1	0	stroma	0	1	0	1	0	0	stroma	0	1	0	1	0	0	0	0	0	stroma	1	1	0	0	0	0
micro-environment of the tumor cells	2	0	0	micro-environment of the tumor cells	2	0	0	0	0	0	0	0	0	micro-environment of the tumor cells	2	0	0	0	0	0	micro-environment of the tumor cells	1	0	0	1	0	0	0	0	0	micro-environment of the tumor cells	2	0	0	0	0	0
macro-environment of the tumor cells	1	0	0	macro-environment of the tumor cells	1	0	0	0	0	0	0	0	0	macro-environment of the tumor cells	1	0	0	0	0	0	macro-environment of the tumor cells	0	0	0	1	0	0	0	0	0	macro-environment of the tumor cells	1	0	0	0	0	0
for small tumors is the microenvironment	1	0	0	for small tumors is the microenvironment	1	0	0	0	0	0	0	0	0	for small tumors is the microenvironment	1	0	0	0	0	0	for small tumors is the microenvironment	1	0	0	0	0	0	0	0	0	for small tumors is the microenvironment	1	0	0	0	0	0
there may be a permissive environment for any metastasis and an environment where the patients’ immune or, self-defense actually helps in terms of tumor metastasize or not	0	1	0	there may be a permissive environment for any metastasis and an environment where the patients’ immune or, self-defense actually helps in terms of tumor metastasize or not	0	0	0	0	1	0	0	0	0	there may be a permissive environment for any metastasis and an environment where the patients’ immune or, self-defense actually helps in terms of tumor metastasize or not	0	0	0	0	1	0	there may be a permissive environment for any metastasis and an environment where the patients’ immune or, self-defense actually helps in terms of tumor metastasize or not	0	1	0	0	0	0	0	0	0	there may be a permissive environment for any metastasis and an environment where the patients’ immune or, self-defense actually helps in terms of tumor metastasize or not	0	0	0	0	1	0
* selection, stress/pressure, microenvironment *	6	0	0	* selection, stress/pressure, microenvironment *	4	0	0	1	0	0	1	0	0	* selection, stress/pressure, microenvironment *	4	0	0	2	0	0	* selection, stress/pressure, microenvironment *	2	0	0	1	0	0	3	0	0	* selection, stress/pressure, microenvironment *	2	0	0	4	0	0
the pressure that the primary tumor is under / what environmental pressures it’s under	2	0	0	the pressure that the primary tumor is under / what environmental pressures it’s under	2	0	0	0	0	0	0	0	0	the pressure that the primary tumor is under / what environmental pressures it’s under	1	0	0	1	0	0	the pressure that the primary tumor is under / what environmental pressures it’s under	1	0	0	0	0	0	1	0	0	the pressure that the primary tumor is under / what environmental pressures it’s under	1	0	0	1	0	0
the bigger the tumor, the more time it had to select for metastatic ability	1	0	0	the bigger the tumor, the more time it had to select for metastatic ability	0	0	0	0	0	0	1	0	0	the bigger the tumor, the more time it had to select for metastatic ability	1	0	0	0	0	0	the bigger the tumor, the more time it had to select for metastatic ability	0	0	0	0	0	0	1	0	0	the bigger the tumor, the more time it had to select for metastatic ability	0	0	0	1	0	0
at a certain point the primary tumor becomes so big that maybe for some cells, it’s in their best interest to leave the primary tumor site, to get more nutrients or to escape that hypoxic setting	1	0	0	at a certain point the primary tumor becomes so big that maybe for some cells, it’s in their best interest to leave the primary tumor site, to get more nutrients or to escape that hypoxic setting	1	0	0	0	0	0	0	0	0	at a certain point the primary tumor becomes so big that maybe for some cells, it’s in their best interest to leave the primary tumor site, to get more nutrients or to escape that hypoxic setting	0	0	0	1	0	0	at a certain point the primary tumor becomes so big that maybe for some cells, it’s in their best interest to leave the primary tumor site, to get more nutrients or to escape that hypoxic setting	0	0	0	0	0	0	1	0	0	at a certain point the primary tumor becomes so big that maybe for some cells, it’s in their best interest to leave the primary tumor site, to get more nutrients or to escape that hypoxic setting	1	0	0	0	0	0
some stress happens in the primary tumor to make cells acquire metastatic potential	1	0	0	some stress happens in the primary tumor to make cells acquire metastatic potential	0	0	0	1	0	0	0	0	0	some stress happens in the primary tumor to make cells acquire metastatic potential	1	0	0	0	0	0	some stress happens in the primary tumor to make cells acquire metastatic potential	0	0	0	1	0	0	0	0	0	some stress happens in the primary tumor to make cells acquire metastatic potential	0	0	0	1	0	0
there is a clonal abnormality that establishes a primary tumor, at some point another stress comes along and out of that becomes the ability to metastasize	1	0	0	there is a clonal abnormality that establishes a primary tumor, at some point another stress comes along and out of that becomes the ability to metastasize	0	0	0	1	0	0	0	0	0	there is a clonal abnormality that establishes a primary tumor, at some point another stress comes along and out of that becomes the ability to metastasize	1	0	0	0	0	0	there is a clonal abnormality that establishes a primary tumor, at some point another stress comes along and out of that becomes the ability to metastasize	0	0	0	1	0	0	0	0	0	there is a clonal abnormality that establishes a primary tumor, at some point another stress comes along and out of that becomes the ability to metastasize	0	0	0	1	0	0
during growth at the primary site, things are happening, selection is taking place and the particular tumor adapts to these selective processes	1	0	0	during growth at the primary site, things are happening, selection is taking place and the particular tumor adapts to these selective processes	0	0	0	0	0	0	1	0	0	during growth at the primary site, things are happening, selection is taking place and the particular tumor adapts to these selective processes	1	0	0	0	0	0	during growth at the primary site, things are happening, selection is taking place and the particular tumor adapts to these selective processes	0	0	0	0	0	0	1	0	0	during growth at the primary site, things are happening, selection is taking place and the particular tumor adapts to these selective processes	0	0	0	1	0	0
part of the way that metastasis genes are acquired, when it’s not present from the very beginning, is that there are certain things that are selected in the primary tumor that secondarily allow that tumor to gain functions needed for metastasis	1	0	0	part of the way that metastasis genes are acquired, when it’s not present from the very beginning, is that there are certain things that are selected in the primary tumor that secondarily allow that tumor to gain functions needed for metastasis	0	0	0	0	0	0	1	0	0	part of the way that metastasis genes are acquired, when it’s not present from the very beginning, is that there are certain things that are selected in the primary tumor that secondarily allow that tumor to gain functions needed for metastasis	1	0	0	0	0	0	part of the way that metastasis genes are acquired, when it’s not present from the very beginning, is that there are certain things that are selected in the primary tumor that secondarily allow that tumor to gain functions needed for metastasis	0	0	0	0	0	0	1	0	0	part of the way that metastasis genes are acquired, when it’s not present from the very beginning, is that there are certain things that are selected in the primary tumor that secondarily allow that tumor to gain functions needed for metastasis	0	0	0	1	0	0
metastatic ability is not directly selected for	1	0	0	metastatic ability is not directly selected for	0	0	0	0	0	0	1	0	0	metastatic ability is not directly selected for	1	0	0	0	0	0	metastatic ability is not directly selected for	0	0	0	0	0	0	1	0	0	metastatic ability is not directly selected for	0	0	0	1	0	0
there are mutations from the primary tumor that might give it some advantage, but it is the selective pressure that this tumor cell is under that then allows it to acquire other changes that facilitate metastasis	1	0	0	there are mutations from the primary tumor that might give it some advantage, but it is the selective pressure that this tumor cell is under that then allows it to acquire other changes that facilitate metastasis	1	0	0	0	0	0	0	0	0	there are mutations from the primary tumor that might give it some advantage, but it is the selective pressure that this tumor cell is under that then allows it to acquire other changes that facilitate metastasis	0	0	0	1	0	0	there are mutations from the primary tumor that might give it some advantage, but it is the selective pressure that this tumor cell is under that then allows it to acquire other changes that facilitate metastasis	0	0	0	0	0	0	1	0	0	there are mutations from the primary tumor that might give it some advantage, but it is the selective pressure that this tumor cell is under that then allows it to acquire other changes that facilitate metastasis	0	0	0	1	0	0
hypoxia	1	0	0	hypoxia	0	0	0	0	0	0	1	0	0	hypoxia	1	0	0	0	0	0	hypoxia	0	0	0	0	0	0	1	0	0	hypoxia	0	0	0	1	0	0
cells have to acquire a survival advantage	1	0	0	cells have to acquire a survival advantage	1	0	0	0	0	0	0	0	0	cells have to acquire a survival advantage	1	0	0	0	0	0	cells have to acquire a survival advantage	1	0	0	0	0	0	0	0	0	cells have to acquire a survival advantage	0	0	0	1	0	0
cancer is an evolutionary process of natural selection of the cells - mutations or epi-genetic changes that are occurring (caused by pressure) that are going to make a cell more capable of executing that function	1	0	0	cancer is an evolutionary process of natural selection of the cells - mutations or epi-genetic changes that are occurring (caused by pressure) that are going to make a cell more capable of executing that function	1	0	0	0	0	0	0	0	0	cancer is an evolutionary process of natural selection of the cells - mutations or epi-genetic changes that are occurring (caused by pressure) that are going to make a cell more capable of executing that function	0	0	0	1	0	0	cancer is an evolutionary process of natural selection of the cells - mutations or epi-genetic changes that are occurring (caused by pressure) that are going to make a cell more capable of executing that function	0	0	0	0	0	0	1	0	0	cancer is an evolutionary process of natural selection of the cells - mutations or epi-genetic changes that are occurring (caused by pressure) that are going to make a cell more capable of executing that function	1	0	0	0	0	0
sort of a Darwinian model of, you know, tumors are growing, they’re being assaulted by the immune system, hypoxia, you know, unfavorable growth conditions, and so they acquire mutations to overcome those things	1	0	0	sort of a Darwinian model of, you know, tumors are growing, they’re being assaulted by the immune system, hypoxia, you know, unfavorable growth conditions, and so they acquire mutations to overcome those things	1	0	0	0	0	0	0	0	0	sort of a Darwinian model of, you know, tumors are growing, they’re being assaulted by the immune system, hypoxia, you know, unfavorable growth conditions, and so they acquire mutations to overcome those things	0	0	0	1	0	0	sort of a Darwinian model of, you know, tumors are growing, they’re being assaulted by the immune system, hypoxia, you know, unfavorable growth conditions, and so they acquire mutations to overcome those things	0	0	0	0	0	0	1	0	0	sort of a Darwinian model of, you know, tumors are growing, they’re being assaulted by the immune system, hypoxia, you know, unfavorable growth conditions, and so they acquire mutations to overcome those things	1	0	0	0	0	0
* biology, individual's genetics *	6	0	0	* biology, individual's genetics *	3	0	0	2	0	0	1	0	0	* biology, individual's genetics *	4	0	0	2	0	0	* biology, individual's genetics *	2	0	0	3	0	0	1	0	0	* biology, individual's genetics *	4	0	0	2	0	0
individual / particular patient / person	3	0	0	individual / particular patient / person	1	0	0	1	0	0	1	0	0	individual / particular patient / person	3	0	0	0	0	0	individual / particular patient / person	1	0	0	2	0	0	0	0	0	individual / particular patient / person	2	0	0	1	0	0
people sort of pre-programmed towards a certain cancer phenotype	1	0	0	people sort of pre-programmed towards a certain cancer phenotype	1	0	0	0	0	0	0	0	0	people sort of pre-programmed towards a certain cancer phenotype	0	0	0	1	0	0	people sort of pre-programmed towards a certain cancer phenotype	0	0	0	0	0	0	1	0	0	people sort of pre-programmed towards a certain cancer phenotype	1	0	0	0	0	0
genetic background - your genetic profile of molecules and how your pathways are set up, and how your cell biology sets up	1	0	0	genetic background - your genetic profile of molecules and how your pathways are set up, and how your cell biology sets up	1	0	0	0	0	0	0	0	0	genetic background - your genetic profile of molecules and how your pathways are set up, and how your cell biology sets up	1	0	0	0	0	0	genetic background - your genetic profile of molecules and how your pathways are set up, and how your cell biology sets up	0	0	0	1	0	0	0	0	0	genetic background - your genetic profile of molecules and how your pathways are set up, and how your cell biology sets up	1	0	0	0	0	0
inheritance	1	0	0	inheritance	1	0	0	0	0	0	0	0	0	inheritance	1	0	0	0	0	0	inheritance	0	0	0	1	0	0	0	0	0	inheritance	1	0	0	0	0	0
genetic factors	1	0	0	genetic factors	1	0	0	0	0	0	0	0	0	genetic factors	1	0	0	0	0	0	genetic factors	0	0	0	1	0	0	0	0	0	genetic factors	1	0	0	0	0	0
we know that both small and large tumors can metastasize, as much as the gene expression signature doesn’t change between the primary and the metastatic site	1	0	0	we know that both small and large tumors can metastasize, as much as the gene expression signature doesn’t change between the primary and the metastatic site	0	0	0	1	0	0	0	0	0	we know that both small and large tumors can metastasize, as much as the gene expression signature doesn’t change between the primary and the metastatic site	0	0	0	1	0	0	we know that both small and large tumors can metastasize, as much as the gene expression signature doesn’t change between the primary and the metastatic site	1	0	0	0	0	0	0	0	0	we know that both small and large tumors can metastasize, as much as the gene expression signature doesn’t change between the primary and the metastatic site	0	0	0	1	0	0
sometimes they’re programmed to behave in an aggressive manner	1	0	0	sometimes they’re programmed to behave in an aggressive manner	0	0	0	1	0	0	0	0	0	sometimes they’re programmed to behave in an aggressive manner	0	0	0	1	0	0	sometimes they’re programmed to behave in an aggressive manner	1	0	0	0	0	0	0	0	0	sometimes they’re programmed to behave in an aggressive manner	0	0	0	1	0	0
* individual's environment *	2	0	0	* individual's environment *	2	0	0	0	0	0	0	0	0	* individual's environment *	2	0	0	0	0	0	* individual's environment *	0	0	0	2	0	0	0	0	0	* individual's environment *	2	0	0	0	0	0
environmental exposures of patient	2	0	0	environmental exposures of patient	2	0	0	0	0	0	0	0	0	environmental exposures of patient	2	0	0	0	0	0	environmental exposures of patient	0	0	0	2	0	0	0	0	0	environmental exposures of patient	2	0	0	0	0	0
patient's stress	1	0	0	patient's stress	1	0	0	0	0	0	0	0	0	patient's stress	1	0	0	0	0	0	patient's stress	0	0	0	1	0	0	0	0	0	patient's stress	1	0	0	0	0	0
patient's diet	2	0	0	patient's diet	2	0	0	0	0	0	0	0	0	patient's diet	2	0	0	0	0	0	patient's diet	0	0	0	2	0	0	0	0	0	patient's diet	2	0	0	0	0	0
* mutations, molecular and genetic changes *	6	2	0	* mutations, molecular and genetic changes *	5	1	0	0	0	0	1	1	0	* mutations, molecular and genetic changes *	5	1	0	1	1	0	* mutations, molecular and genetic changes *	3	0	0	2	0	0	1	2	0	* mutations, molecular and genetic changes *	5	0	0	1	2	0
genetic or epigenetic changes within the cell	1	0	0	genetic or epigenetic changes within the cell	0	0	0	0	0	0	1	0	0	genetic or epigenetic changes within the cell	1	0	0	0	0	0	genetic or epigenetic changes within the cell	1	0	0	0	0	0	0	0	0	genetic or epigenetic changes within the cell	1	0	0	0	0	0
bigger tumors acquire lots of genetic lesions, through a genetic mechanism	1	0	0	bigger tumors acquire lots of genetic lesions, through a genetic mechanism	1	0	0	0	0	0	0	0	0	bigger tumors acquire lots of genetic lesions, through a genetic mechanism	1	0	0	0	0	0	bigger tumors acquire lots of genetic lesions, through a genetic mechanism	1	0	0	0	0	0	0	0	0	bigger tumors acquire lots of genetic lesions, through a genetic mechanism	1	0	0	0	0	0
a result of genetic alterations in tumors cells	1	0	0	a result of genetic alterations in tumors cells	1	0	0	0	0	0	0	0	0	a result of genetic alterations in tumors cells	1	0	0	0	0	0	a result of genetic alterations in tumors cells	1	0	0	0	0	0	0	0	0	a result of genetic alterations in tumors cells	0	0	0	1	0	0
oncogenic mutations	0	1	0	oncogenic mutations	0	0	0	0	0	0	0	1	0	oncogenic mutations	0	1	0	0	0	0	oncogenic mutations	0	0	0	0	0	0	0	1	0	oncogenic mutations	0	0	0	0	1	0
initial genetic mutations	1	0	0	initial genetic mutations	1	0	0	0	0	0	0	0	0	initial genetic mutations	1	0	0	0	0	0	initial genetic mutations	0	0	0	1	0	0	0	0	0	initial genetic mutations	1	0	0	0	0	0
mutations / genetic mutations	1	0	0	mutations / genetic mutations	1	0	0	0	0	0	0	0	0	mutations / genetic mutations	1	0	0	0	0	0	mutations / genetic mutations	0	0	0	1	0	0	0	0	0	mutations / genetic mutations	1	0	0	0	0	0
there are mutations from the primary tumor that might give it some advantage, but it is the selective pressure that this tumor cell is under that then allows it to acquire other changes that facilitate metastasis	0	1	0	there are mutations from the primary tumor that might give it some advantage, but it is the selective pressure that this tumor cell is under that then allows it to acquire other changes that facilitate metastasis	0	1	0	0	0	0	0	0	0	there are mutations from the primary tumor that might give it some advantage, but it is the selective pressure that this tumor cell is under that then allows it to acquire other changes that facilitate metastasis	0	0	0	0	1	0	there are mutations from the primary tumor that might give it some advantage, but it is the selective pressure that this tumor cell is under that then allows it to acquire other changes that facilitate metastasis	0	0	0	0	0	0	0	1	0	there are mutations from the primary tumor that might give it some advantage, but it is the selective pressure that this tumor cell is under that then allows it to acquire other changes that facilitate metastasis	0	0	0	0	1	0
cancer is an evolutionary process of natural selection of the cells - mutations or epi-genetic changes that are occurring (caused by pressure) that are going to make a cell more capable of executing that function	1	0	0	cancer is an evolutionary process of natural selection of the cells - mutations or epi-genetic changes that are occurring (caused by pressure) that are going to make a cell more capable of executing that function	1	0	0	0	0	0	0	0	0	cancer is an evolutionary process of natural selection of the cells - mutations or epi-genetic changes that are occurring (caused by pressure) that are going to make a cell more capable of executing that function	0	0	0	1	0	0	cancer is an evolutionary process of natural selection of the cells - mutations or epi-genetic changes that are occurring (caused by pressure) that are going to make a cell more capable of executing that function	0	0	0	0	0	0	1	0	0	cancer is an evolutionary process of natural selection of the cells - mutations or epi-genetic changes that are occurring (caused by pressure) that are going to make a cell more capable of executing that function	1	0	0	0	0	0
they’ve only moved because the migrating cell has changed its epigenetic program (changed its program of gene expression in response to the environment - and because it’s non-genetic, it’s reversible)	1	0	0	they’ve only moved because the migrating cell has changed its epigenetic program (changed its program of gene expression in response to the environment - and because it’s non-genetic, it’s reversible)	1	0	0	0	0	0	0	0	0	they’ve only moved because the migrating cell has changed its epigenetic program (changed its program of gene expression in response to the environment - and because it’s non-genetic, it’s reversible)	1	0	0	0	0	0	they’ve only moved because the migrating cell has changed its epigenetic program (changed its program of gene expression in response to the environment - and because it’s non-genetic, it’s reversible)	1	0	0	0	0	0	0	0	0	they’ve only moved because the migrating cell has changed its epigenetic program (changed its program of gene expression in response to the environment - and because it’s non-genetic, it’s reversible)	1	0	0	0	0	0
* blood supply, lymph/angiogenesis *	3	0	0	* blood supply, lymph/angiogenesis *	1	0	0	1	0	0	1	0	0	* blood supply, lymph/angiogenesis *	2	0	0	1	0	0	* blood supply, lymph/angiogenesis *	0	0	0	3	0	0	0	0	0	* blood supply, lymph/angiogenesis *	2	0	0	1	0	0
access to the blood stream	1	0	0	access to the blood stream	0	0	0	0	0	0	1	0	0	access to the blood stream	0	0	0	1	0	0	access to the blood stream	0	0	0	1	0	0	0	0	0	access to the blood stream	1	0	0	0	0	0
a key step that subsequently facilitates metastasis when the tumor switches on the capacity to attract the growth of blood vessels and lymphatics towards the cancer - when the tumor cells start secreting the proteins that attract blood vessels and lymphatics	1	0	0	a key step that subsequently facilitates metastasis when the tumor switches on the capacity to attract the growth of blood vessels and lymphatics towards the cancer - when the tumor cells start secreting the proteins that attract blood vessels and lymphatics	1	0	0	0	0	0	0	0	0	a key step that subsequently facilitates metastasis when the tumor switches on the capacity to attract the growth of blood vessels and lymphatics towards the cancer - when the tumor cells start secreting the proteins that attract blood vessels and lymphatics	1	0	0	0	0	0	a key step that subsequently facilitates metastasis when the tumor switches on the capacity to attract the growth of blood vessels and lymphatics towards the cancer - when the tumor cells start secreting the proteins that attract blood vessels and lymphatics	0	0	0	1	0	0	0	0	0	a key step that subsequently facilitates metastasis when the tumor switches on the capacity to attract the growth of blood vessels and lymphatics towards the cancer - when the tumor cells start secreting the proteins that attract blood vessels and lymphatics	1	0	0	0	0	0
making or secreting the right mixture of angiogenic and lympho-angiogenic growth factors that provide the abundance of blood vessels and lymphatics that facilitate metastatic spread	1	0	0	making or secreting the right mixture of angiogenic and lympho-angiogenic growth factors that provide the abundance of blood vessels and lymphatics that facilitate metastatic spread	1	0	0	0	0	0	0	0	0	making or secreting the right mixture of angiogenic and lympho-angiogenic growth factors that provide the abundance of blood vessels and lymphatics that facilitate metastatic spread	1	0	0	0	0	0	making or secreting the right mixture of angiogenic and lympho-angiogenic growth factors that provide the abundance of blood vessels and lymphatics that facilitate metastatic spread	0	0	0	1	0	0	0	0	0	making or secreting the right mixture of angiogenic and lympho-angiogenic growth factors that provide the abundance of blood vessels and lymphatics that facilitate metastatic spread	1	0	0	0	0	0
cells grow up to a point, then thay need blood vessels - the ability to metastasis is concurrent or follows this angiogenic capacity	1	0	0	cells grow up to a point, then thay need blood vessels - the ability to metastasis is concurrent or follows this angiogenic capacity	0	0	0	1	0	0	0	0	0	cells grow up to a point, then thay need blood vessels - the ability to metastasis is concurrent or follows this angiogenic capacity	1	0	0	0	0	0	cells grow up to a point, then thay need blood vessels - the ability to metastasis is concurrent or follows this angiogenic capacity	0	0	0	1	0	0	0	0	0	cells grow up to a point, then thay need blood vessels - the ability to metastasis is concurrent or follows this angiogenic capacity	0	0	0	1	0	0
* random *	4	0	0	* random *	2	0	0	1	0	0	1	0	0	* random *	3	0	0	1	0	0	* random *	1	0	0	2	0	0	1	0	0	* random *	3	0	0	1	0	0
opportunistic / stochastic chance/ it may well be written in the stars for cancer even at an early stage	3	0	0	opportunistic / stochastic chance/ it may well be written in the stars for cancer even at an early stage	1	0	0	1	0	0	1	0	0	opportunistic / stochastic chance/ it may well be written in the stars for cancer even at an early stage	2	0	0	1	0	0	opportunistic / stochastic chance/ it may well be written in the stars for cancer even at an early stage	0	0	0	2	0	0	1	0	0	opportunistic / stochastic chance/ it may well be written in the stars for cancer even at an early stage	2	0	0	1	0	0
most cancer cells that start to leave the primary tumor probably never survive	1	0	0	most cancer cells that start to leave the primary tumor probably never survive	1	0	0	0	0	0	0	0	0	most cancer cells that start to leave the primary tumor probably never survive	1	0	0	0	0	0	most cancer cells that start to leave the primary tumor probably never survive	1	0	0	0	0	0	0	0	0	most cancer cells that start to leave the primary tumor probably never survive	1	0	0	0	0	0
* combination, many factors throughout *	6	2	0	* combination, many factors throughout *	4	1	0	0	0	0	2	1	0	* combination, many factors throughout *	4	1	0	2	1	0	* combination, many factors throughout *	1	1	0	3	0	0	2	1	0	* combination, many factors throughout *	5	1	0	1	1	0
key events at each level	1	0	0	key events at each level	1	0	0	0	0	0	0	0	0	key events at each level	1	0	0	0	0	0	key events at each level	0	0	0	1	0	0	0	0	0	key events at each level	1	0	0	0	0	0
a wide variety of causes	0	1	0	a wide variety of causes	0	0	0	0	0	0	0	1	0	a wide variety of causes	0	1	0	0	0	0	a wide variety of causes	0	1	0	0	0	0	0	0	0	a wide variety of causes	0	1	0	0	0	0
combination of factors / a whole host of factors	3	0	0	combination of factors / a whole host of factors	2	0	0	0	0	0	1	0	0	combination of factors / a whole host of factors	2	0	0	1	0	0	combination of factors / a whole host of factors	0	0	0	3	0	0	0	0	0	combination of factors / a whole host of factors	3	0	0	0	0	0
a combination of needing to acquire mutations but that there is going to a heavy involvement in genetic background or sort of the individual cell type	1	0	0	a combination of needing to acquire mutations but that there is going to a heavy involvement in genetic background or sort of the individual cell type	1	0	0	0	0	0	0	0	0	a combination of needing to acquire mutations but that there is going to a heavy involvement in genetic background or sort of the individual cell type	0	0	0	1	0	0	a combination of needing to acquire mutations but that there is going to a heavy involvement in genetic background or sort of the individual cell type	0	0	0	0	0	0	1	0	0	a combination of needing to acquire mutations but that there is going to a heavy involvement in genetic background or sort of the individual cell type	1	0	0	0	0	0
for small tumors is the microenvironment, bigger tumors acquire lots of genetic lesions, through a genetic mechanism, so there is a combination of genetic plus micro-environment	1	0	0	for small tumors is the microenvironment, bigger tumors acquire lots of genetic lesions, through a genetic mechanism, so there is a combination of genetic plus micro-environment	1	0	0	0	0	0	0	0	0	for small tumors is the microenvironment, bigger tumors acquire lots of genetic lesions, through a genetic mechanism, so there is a combination of genetic plus micro-environment	1	0	0	0	0	0	for small tumors is the microenvironment, bigger tumors acquire lots of genetic lesions, through a genetic mechanism, so there is a combination of genetic plus micro-environment	1	0	0	0	0	0	0	0	0	for small tumors is the microenvironment, bigger tumors acquire lots of genetic lesions, through a genetic mechanism, so there is a combination of genetic plus micro-environment	1	0	0	0	0	0
things that they co-opt in order to grow at the primary site will dictate how metastatic their behavior is	1	0	0	things that they co-opt in order to grow at the primary site will dictate how metastatic their behavior is	0	0	0	0	0	0	1	0	0	things that they co-opt in order to grow at the primary site will dictate how metastatic their behavior is	1	0	0	0	0	0	things that they co-opt in order to grow at the primary site will dictate how metastatic their behavior is	0	0	0	0	0	0	1	0	0	things that they co-opt in order to grow at the primary site will dictate how metastatic their behavior is	0	0	0	1	0	0
there are mutations from the primary tumor that might give it some advantage, but it is the selective pressure that this tumor cell is under that then allows it to acquire other changes that facilitate metastasis	0	1	0	there are mutations from the primary tumor that might give it some advantage, but it is the selective pressure that this tumor cell is under that then allows it to acquire other changes that facilitate metastasis	0	1	0	0	0	0	0	0	0	there are mutations from the primary tumor that might give it some advantage, but it is the selective pressure that this tumor cell is under that then allows it to acquire other changes that facilitate metastasis	0	0	0	0	1	0	there are mutations from the primary tumor that might give it some advantage, but it is the selective pressure that this tumor cell is under that then allows it to acquire other changes that facilitate metastasis	0	0	0	0	0	0	0	1	0	there are mutations from the primary tumor that might give it some advantage, but it is the selective pressure that this tumor cell is under that then allows it to acquire other changes that facilitate metastasis	0	0	0	0	1	0
* don't know *	3	0	0	* don't know *	1	0	0	2	0	0	0	0	0	* don't know *	1	0	0	2	0	0	* don't know *	2	0	0	1	0	0	0	0	0	* don't know *	1	0	0	2	0	0
exactly why some cells go on to metastasize and others don’t we don’t know	1	0	0	exactly why some cells go on to metastasize and others don’t we don’t know	0	0	0	1	0	0	0	0	0	exactly why some cells go on to metastasize and others don’t we don’t know	0	0	0	1	0	0	exactly why some cells go on to metastasize and others don’t we don’t know	0	0	0	1	0	0	0	0	0	exactly why some cells go on to metastasize and others don’t we don’t know	0	0	0	1	0	0
don't know what is appropriate environment for metastasis	1	0	0	don't know what is appropriate environment for metastasis	0	0	0	1	0	0	0	0	0	don't know what is appropriate environment for metastasis	1	0	0	0	0	0	don't know what is appropriate environment for metastasis	1	0	0	0	0	0	0	0	0	don't know what is appropriate environment for metastasis	0	0	0	1	0	0
know what it depends on, just a measure of the properties of the tumor and the instability of it	1	0	0	know what it depends on, just a measure of the properties of the tumor and the instability of it	1	0	0	0	0	0	0	0	0	know what it depends on, just a measure of the properties of the tumor and the instability of it	0	0	0	1	0	0	know what it depends on, just a measure of the properties of the tumor and the instability of it	1	0	0	0	0	0	0	0	0	know what it depends on, just a measure of the properties of the tumor and the instability of it	1	0	0	0	0	0
* ability to escape, move, invade *	3	0	0	* ability to escape, move, invade *	1	0	0	2	0	0	0	0	0	* ability to escape, move, invade *	3	0	0	0	0	0	* ability to escape, move, invade *	1	0	0	1	0	0	1	0	0	* ability to escape, move, invade *	1	0	0	2	0	0
ability to physically escape (eg, the stroma) or just fall off	1	0	0	ability to physically escape (eg, the stroma) or just fall off	0	0	0	1	0	0	0	0	0	ability to physically escape (eg, the stroma) or just fall off	1	0	0	0	0	0	ability to physically escape (eg, the stroma) or just fall off	0	0	0	0	0	0	1	0	0	ability to physically escape (eg, the stroma) or just fall off	0	0	0	1	0	0
the ability to move around	1	0	0	the ability to move around	0	0	0	1	0	0	0	0	0	the ability to move around	1	0	0	0	0	0	the ability to move around	0	0	0	1	0	0	0	0	0	the ability to move around	0	0	0	1	0	0
you need the machinery within the cell to be active to push that cell through the surrounding matrix, to degrade collagen or move in a particular way	1	0	0	you need the machinery within the cell to be active to push that cell through the surrounding matrix, to degrade collagen or move in a particular way	1	0	0	0	0	0	0	0	0	you need the machinery within the cell to be active to push that cell through the surrounding matrix, to degrade collagen or move in a particular way	1	0	0	0	0	0	you need the machinery within the cell to be active to push that cell through the surrounding matrix, to degrade collagen or move in a particular way	1	0	0	0	0	0	0	0	0	you need the machinery within the cell to be active to push that cell through the surrounding matrix, to degrade collagen or move in a particular way	1	0	0	0	0	0
those cells then have the propensity to move away from the primary tumor into the surrounding tissue - those metastasizing cells will be non-dividing, and highly invasive	1	0	0	those cells then have the propensity to move away from the primary tumor into the surrounding tissue - those metastasizing cells will be non-dividing, and highly invasive	1	0	0	0	0	0	0	0	0	those cells then have the propensity to move away from the primary tumor into the surrounding tissue - those metastasizing cells will be non-dividing, and highly invasive	1	0	0	0	0	0	those cells then have the propensity to move away from the primary tumor into the surrounding tissue - those metastasizing cells will be non-dividing, and highly invasive	1	0	0	0	0	0	0	0	0	those cells then have the propensity to move away from the primary tumor into the surrounding tissue - those metastasizing cells will be non-dividing, and highly invasive	1	0	0	0	0	0
* evade individual's immune system *	2	1	0	* evade individual's immune system *	0	0	0	2	1	0	0	0	0	* evade individual's immune system *	1	0	0	1	1	0	* evade individual's immune system *	1	1	0	0	0	0	1	0	0	* evade individual's immune system *	0	0	0	2	1	0
ability to evade immune system	1	0	0	ability to evade immune system	0	0	0	1	0	0	0	0	0	ability to evade immune system	1	0	0	0	0	0	ability to evade immune system	0	0	0	0	0	0	1	0	0	ability to evade immune system	0	0	0	1	0	0
the immune mechanisms, that patients develop towards the cancer cells, I think that makes a difference	1	0	0	the immune mechanisms, that patients develop towards the cancer cells, I think that makes a difference	0	0	0	1	0	0	0	0	0	the immune mechanisms, that patients develop towards the cancer cells, I think that makes a difference	0	0	0	1	0	0	the immune mechanisms, that patients develop towards the cancer cells, I think that makes a difference	1	0	0	0	0	0	0	0	0	the immune mechanisms, that patients develop towards the cancer cells, I think that makes a difference	0	0	0	1	0	0
there may be a permissive environment for any metastasis and an environment where the patients’ immune or, self-defense actually helps in terms of tumor metastasize or not	0	1	0	there may be a permissive environment for any metastasis and an environment where the patients’ immune or, self-defense actually helps in terms of tumor metastasize or not	0	0	0	0	1	0	0	0	0	there may be a permissive environment for any metastasis and an environment where the patients’ immune or, self-defense actually helps in terms of tumor metastasize or not	0	0	0	0	1	0	there may be a permissive environment for any metastasis and an environment where the patients’ immune or, self-defense actually helps in terms of tumor metastasize or not	0	1	0	0	0	0	0	0	0	there may be a permissive environment for any metastasis and an environment where the patients’ immune or, self-defense actually helps in terms of tumor metastasize or not	0	0	0	0	1	0
* pass threshold/barrier *	1	0	0	* pass threshold/barrier *	1	0	0	0	0	0	0	0	0	* pass threshold/barrier *	1	0	0	0	0	0	* pass threshold/barrier *	1	0	0	0	0	0	0	0	0	* pass threshold/barrier *	1	0	0	0	0	0
threshold events and lowering the threshold is gonna be very important for generating metastasis	1	0	0	threshold events and lowering the threshold is gonna be very important for generating metastasis	1	0	0	0	0	0	0	0	0	threshold events and lowering the threshold is gonna be very important for generating metastasis	1	0	0	0	0	0	threshold events and lowering the threshold is gonna be very important for generating metastasis	1	0	0	0	0	0	0	0	0	threshold events and lowering the threshold is gonna be very important for generating metastasis	1	0	0	0	0	0
the cell has to have a certain threshold beyond which it does something - a signal comes in	1	0	0	the cell has to have a certain threshold beyond which it does something - a signal comes in	1	0	0	0	0	0	0	0	0	the cell has to have a certain threshold beyond which it does something - a signal comes in	1	0	0	0	0	0	the cell has to have a certain threshold beyond which it does something - a signal comes in	1	0	0	0	0	0	0	0	0	the cell has to have a certain threshold beyond which it does something - a signal comes in	1	0	0	0	0	0
* loss of suppression *	1	2	0	* loss of suppression *	0	0	0	1	1	0	0	1	0	* loss of suppression *	1	2	0	0	0	0	* loss of suppression *	1	1	0	0	0	0	0	1	0	* loss of suppression *	0	0	0	1	2	0
loss of tumor suppression genes	0	1	0	loss of tumor suppression genes	0	0	0	0	0	0	0	1	0	loss of tumor suppression genes	0	1	0	0	0	0	loss of tumor suppression genes	0	0	0	0	0	0	0	1	0	loss of tumor suppression genes	0	0	0	0	1	0
data suggests that if you move the primary sometimes then sometimes the metastasis grows - almost like the primary tumor represses the metastatic spread	1	0	0	data suggests that if you move the primary sometimes then sometimes the metastasis grows - almost like the primary tumor represses the metastatic spread	0	0	0	1	0	0	0	0	0	data suggests that if you move the primary sometimes then sometimes the metastasis grows - almost like the primary tumor represses the metastatic spread	1	0	0	0	0	0	data suggests that if you move the primary sometimes then sometimes the metastasis grows - almost like the primary tumor represses the metastatic spread	1	0	0	0	0	0	0	0	0	data suggests that if you move the primary sometimes then sometimes the metastasis grows - almost like the primary tumor represses the metastatic spread	0	0	0	1	0	0
over time what happens is that the tumor looses that repressive ability, and therefore you have metastasis	0	1	0	over time what happens is that the tumor looses that repressive ability, and therefore you have metastasis	0	0	0	0	1	0	0	0	0	over time what happens is that the tumor looses that repressive ability, and therefore you have metastasis	0	1	0	0	0	0	over time what happens is that the tumor looses that repressive ability, and therefore you have metastasis	0	1	0	0	0	0	0	0	0	over time what happens is that the tumor looses that repressive ability, and therefore you have metastasis	0	0	0	0	1	0
* signalling *	3	0	0	* signalling *	2	0	0	0	0	0	1	0	0	* signalling *	3	0	0	0	0	0	* signalling *	3	0	0	0	0	0	0	0	0	* signalling *	2	0	0	1	0	0
signals being sent to the cancer cells from the cells within the tumor (fibroblasts or immune system cells or nerve fibers…)	1	0	0	signals being sent to the cancer cells from the cells within the tumor (fibroblasts or immune system cells or nerve fibers…)	0	0	0	0	0	0	1	0	0	signals being sent to the cancer cells from the cells within the tumor (fibroblasts or immune system cells or nerve fibers…)	1	0	0	0	0	0	signals being sent to the cancer cells from the cells within the tumor (fibroblasts or immune system cells or nerve fibers…)	1	0	0	0	0	0	0	0	0	signals being sent to the cancer cells from the cells within the tumor (fibroblasts or immune system cells or nerve fibers…)	1	0	0	0	0	0
cells have to acquire the ability to no longer be constrained by normal signals that would say ‘you belong here’ so they have to do some sort of locational signals as well	1	0	0	cells have to acquire the ability to no longer be constrained by normal signals that would say ‘you belong here’ so they have to do some sort of locational signals as well	1	0	0	0	0	0	0	0	0	cells have to acquire the ability to no longer be constrained by normal signals that would say ‘you belong here’ so they have to do some sort of locational signals as well	1	0	0	0	0	0	cells have to acquire the ability to no longer be constrained by normal signals that would say ‘you belong here’ so they have to do some sort of locational signals as well	1	0	0	0	0	0	0	0	0	cells have to acquire the ability to no longer be constrained by normal signals that would say ‘you belong here’ so they have to do some sort of locational signals as well	0	0	0	1	0	0
gain the ability to fuse with the surrounding extracellular matrix and endothelial cells such that they can pass through unimpeded - there’s a variety of molecular and signaling events that take place for that to occur	1	0	0	gain the ability to fuse with the surrounding extracellular matrix and endothelial cells such that they can pass through unimpeded - there’s a variety of molecular and signaling events that take place for that to occur	1	0	0	0	0	0	0	0	0	gain the ability to fuse with the surrounding extracellular matrix and endothelial cells such that they can pass through unimpeded - there’s a variety of molecular and signaling events that take place for that to occur	1	0	0	0	0	0	gain the ability to fuse with the surrounding extracellular matrix and endothelial cells such that they can pass through unimpeded - there’s a variety of molecular and signaling events that take place for that to occur	1	0	0	0	0	0	0	0	0	gain the ability to fuse with the surrounding extracellular matrix and endothelial cells such that they can pass through unimpeded - there’s a variety of molecular and signaling events that take place for that to occur	0	0	0	1	0	0
the cell has to have a certain threshold beyond which it does something - a signal comes in	1	0	0	the cell has to have a certain threshold beyond which it does something - a signal comes in	1	0	0	0	0	0	0	0	0	the cell has to have a certain threshold beyond which it does something - a signal comes in	1	0	0	0	0	0	the cell has to have a certain threshold beyond which it does something - a signal comes in	1	0	0	0	0	0	0	0	0	the cell has to have a certain threshold beyond which it does something - a signal comes in	1	0	0	0	0	0
* ECM proximity *	2	0	0	* ECM proximity *	1	0	0	0	0	0	1	0	0	* ECM proximity *	1	0	0	1	0	0	* ECM proximity *	1	0	0	1	0	0	0	0	0	* ECM proximity *	1	0	0	1	0	0
access to the extra cellular matrix	1	0	0	access to the extra cellular matrix	0	0	0	0	0	0	1	0	0	access to the extra cellular matrix	0	0	0	1	0	0	access to the extra cellular matrix	0	0	0	1	0	0	0	0	0	access to the extra cellular matrix	1	0	0	0	0	0
gain the ability to fuse with the surrounding extracellular matrix and endothelial cells such that they can pass through unimpeded - there’s a variety of molecular and signaling events that take place for that to occur	1	0	0	gain the ability to fuse with the surrounding extracellular matrix and endothelial cells such that they can pass through unimpeded - there’s a variety of molecular and signaling events that take place for that to occur	1	0	0	0	0	0	0	0	0	gain the ability to fuse with the surrounding extracellular matrix and endothelial cells such that they can pass through unimpeded - there’s a variety of molecular and signaling events that take place for that to occur	1	0	0	0	0	0	gain the ability to fuse with the surrounding extracellular matrix and endothelial cells such that they can pass through unimpeded - there’s a variety of molecular and signaling events that take place for that to occur	1	0	0	0	0	0	0	0	0	gain the ability to fuse with the surrounding extracellular matrix and endothelial cells such that they can pass through unimpeded - there’s a variety of molecular and signaling events that take place for that to occur	0	0	0	1	0	0
* other *	1	1	0	* other *	0	0	0	0	0	0	1	1	0	* other *	1	1	0	0	0	0	* other *	0	0	0	0	0	0	1	1	0	* other *	0	0	0	1	1	0
the original treatment (eg, the wound response that the surgery was associated with) can be trigger for metastasis	0	1	0	the original treatment (eg, the wound response that the surgery was associated with) can be trigger for metastasis	0	0	0	0	0	0	0	1	0	the original treatment (eg, the wound response that the surgery was associated with) can be trigger for metastasis	0	1	0	0	0	0	the original treatment (eg, the wound response that the surgery was associated with) can be trigger for metastasis	0	0	0	0	0	0	0	1	0	the original treatment (eg, the wound response that the surgery was associated with) can be trigger for metastasis	0	0	0	0	1	0
the wound response	1	0	0	the wound response	0	0	0	0	0	0	1	0	0	the wound response	1	0	0	0	0	0	the wound response	0	0	0	0	0	0	1	0	0	the wound response	0	0	0	1	0	0
inflammation because of the immune mediated attack on the tumor cell	1	0	0	inflammation because of the immune mediated attack on the tumor cell	0	0	0	0	0	0	1	0	0	inflammation because of the immune mediated attack on the tumor cell	1	0	0	0	0	0	inflammation because of the immune mediated attack on the tumor cell	0	0	0	0	0	0	1	0	0	inflammation because of the immune mediated attack on the tumor cell	0	0	0	1	0	0
WHAT IS NOT KNOWN	2	0	0	WHAT IS NOT KNOWN	2	0	0	0	0	0	0	0	0	WHAT IS NOT KNOWN	2	0	0	0	0	0	WHAT IS NOT KNOWN	1	0	0	1	0	0	0	0	0	WHAT IS NOT KNOWN	0	0	0	2	0	0
there is the pre-malignant stage first and the whole cancer stem cell concept - but we don't know when do they acquire metastatic abilities	1	0	0	there is the pre-malignant stage first and the whole cancer stem cell concept - but we don't know when do they acquire metastatic abilities	1	0	0	0	0	0	0	0	0	there is the pre-malignant stage first and the whole cancer stem cell concept - but we don't know when do they acquire metastatic abilities	1	0	0	0	0	0	there is the pre-malignant stage first and the whole cancer stem cell concept - but we don't know when do they acquire metastatic abilities	0	0	0	1	0	0	0	0	0	there is the pre-malignant stage first and the whole cancer stem cell concept - but we don't know when do they acquire metastatic abilities	0	0	0	1	0	0
there is the pre-malignant stage first and the whole cancer stem cell concept - but we don't know in what form of stem-ness at what stage they acquire metastatic abilities	1	0	0	there is the pre-malignant stage first and the whole cancer stem cell concept - but we don't know in what form of stem-ness at what stage they acquire metastatic abilities	1	0	0	0	0	0	0	0	0	there is the pre-malignant stage first and the whole cancer stem cell concept - but we don't know in what form of stem-ness at what stage they acquire metastatic abilities	1	0	0	0	0	0	there is the pre-malignant stage first and the whole cancer stem cell concept - but we don't know in what form of stem-ness at what stage they acquire metastatic abilities	0	0	0	1	0	0	0	0	0	there is the pre-malignant stage first and the whole cancer stem cell concept - but we don't know in what form of stem-ness at what stage they acquire metastatic abilities	0	0	0	1	0	0
lab models investigating this use the major idea that if metastasis can be formed early enough, then its expression profile will be quite different from the primary tumor - but final phenotype and expression of specific genes is very much dependent on the micro-environment, so in any case I would consider that the primary tumor and the distant secondary tumor will be still different entity	1	0	0	lab models investigating this use the major idea that if metastasis can be formed early enough, then its expression profile will be quite different from the primary tumor - but final phenotype and expression of specific genes is very much dependent on the micro-environment, so in any case I would consider that the primary tumor and the distant secondary tumor will be still different entity	1	0	0	0	0	0	0	0	0	lab models investigating this use the major idea that if metastasis can be formed early enough, then its expression profile will be quite different from the primary tumor - but final phenotype and expression of specific genes is very much dependent on the micro-environment, so in any case I would consider that the primary tumor and the distant secondary tumor will be still different entity	1	0	0	0	0	0	lab models investigating this use the major idea that if metastasis can be formed early enough, then its expression profile will be quite different from the primary tumor - but final phenotype and expression of specific genes is very much dependent on the micro-environment, so in any case I would consider that the primary tumor and the distant secondary tumor will be still different entity	1	0	0	0	0	0	0	0	0	lab models investigating this use the major idea that if metastasis can be formed early enough, then its expression profile will be quite different from the primary tumor - but final phenotype and expression of specific genes is very much dependent on the micro-environment, so in any case I would consider that the primary tumor and the distant secondary tumor will be still different entity	0	0	0	1	0	0
PARTICULAR CANCERS	5	0	0	PARTICULAR CANCERS	3	0	0	2	0	0	0	0	0	PARTICULAR CANCERS	3	0	0	2	0	0	PARTICULAR CANCERS	2	0	0	1	0	0	2	0	0	PARTICULAR CANCERS	3	0	0	2	0	0
for GI, the development of a cancer cell has the potential to metastasize	1	0	0	for GI, the development of a cancer cell has the potential to metastasize	0	0	0	1	0	0	0	0	0	for GI, the development of a cancer cell has the potential to metastasize	1	0	0	0	0	0	for GI, the development of a cancer cell has the potential to metastasize	0	0	0	0	0	0	1	0	0	for GI, the development of a cancer cell has the potential to metastasize	0	0	0	1	0	0
in neuroblastoma it’s very early - the patients have very acute presentations	1	0	0	in neuroblastoma it’s very early - the patients have very acute presentations	0	0	0	1	0	0	0	0	0	in neuroblastoma it’s very early - the patients have very acute presentations	0	0	0	1	0	0	in neuroblastoma it’s very early - the patients have very acute presentations	0	0	0	1	0	0	0	0	0	in neuroblastoma it’s very early - the patients have very acute presentations	0	0	0	1	0	0
in neuroblastoma on the other hand, there are these tumors that will stay localized for years and never metastasize	1	0	0	in neuroblastoma on the other hand, there are these tumors that will stay localized for years and never metastasize	0	0	0	1	0	0	0	0	0	in neuroblastoma on the other hand, there are these tumors that will stay localized for years and never metastasize	0	0	0	1	0	0	in neuroblastoma on the other hand, there are these tumors that will stay localized for years and never metastasize	0	0	0	1	0	0	0	0	0	in neuroblastoma on the other hand, there are these tumors that will stay localized for years and never metastasize	0	0	0	1	0	0
in neuroblastoma, the primary tumor has multiple copies of the n-myc, so does the metastatic disease	1	0	0	in neuroblastoma, the primary tumor has multiple copies of the n-myc, so does the metastatic disease	0	0	0	1	0	0	0	0	0	in neuroblastoma, the primary tumor has multiple copies of the n-myc, so does the metastatic disease	0	0	0	1	0	0	in neuroblastoma, the primary tumor has multiple copies of the n-myc, so does the metastatic disease	0	0	0	1	0	0	0	0	0	in neuroblastoma, the primary tumor has multiple copies of the n-myc, so does the metastatic disease	0	0	0	1	0	0
in neuroblastoma, the babies who have metastatic disease don’t typically have n-myc amplification	1	0	0	in neuroblastoma, the babies who have metastatic disease don’t typically have n-myc amplification	0	0	0	1	0	0	0	0	0	in neuroblastoma, the babies who have metastatic disease don’t typically have n-myc amplification	0	0	0	1	0	0	in neuroblastoma, the babies who have metastatic disease don’t typically have n-myc amplification	0	0	0	1	0	0	0	0	0	in neuroblastoma, the babies who have metastatic disease don’t typically have n-myc amplification	0	0	0	1	0	0
for melanoma, that already have a migratory mechanism, even a small tumor will generate sufficient micro-environmental change to induce metastasis to occur	1	0	0	for melanoma, that already have a migratory mechanism, even a small tumor will generate sufficient micro-environmental change to induce metastasis to occur	1	0	0	0	0	0	0	0	0	for melanoma, that already have a migratory mechanism, even a small tumor will generate sufficient micro-environmental change to induce metastasis to occur	1	0	0	0	0	0	for melanoma, that already have a migratory mechanism, even a small tumor will generate sufficient micro-environmental change to induce metastasis to occur	1	0	0	0	0	0	0	0	0	for melanoma, that already have a migratory mechanism, even a small tumor will generate sufficient micro-environmental change to induce metastasis to occur	1	0	0	0	0	0
in others like breast cancer, you might need to get quite a big tumor, before the same micro-environmental events might lead to metastasis to occur	1	0	0	in others like breast cancer, you might need to get quite a big tumor, before the same micro-environmental events might lead to metastasis to occur	1	0	0	0	0	0	0	0	0	in others like breast cancer, you might need to get quite a big tumor, before the same micro-environmental events might lead to metastasis to occur	1	0	0	0	0	0	in others like breast cancer, you might need to get quite a big tumor, before the same micro-environmental events might lead to metastasis to occur	1	0	0	0	0	0	0	0	0	in others like breast cancer, you might need to get quite a big tumor, before the same micro-environmental events might lead to metastasis to occur	1	0	0	0	0	0
in breast cancer, first metastasis generally comes rather late in disease development, but that doesn’t say that they’re not attempts at metastasis much earlier	1	0	0	in breast cancer, first metastasis generally comes rather late in disease development, but that doesn’t say that they’re not attempts at metastasis much earlier	1	0	0	0	0	0	0	0	0	in breast cancer, first metastasis generally comes rather late in disease development, but that doesn’t say that they’re not attempts at metastasis much earlier	1	0	0	0	0	0	in breast cancer, first metastasis generally comes rather late in disease development, but that doesn’t say that they’re not attempts at metastasis much earlier	1	0	0	0	0	0	0	0	0	in breast cancer, first metastasis generally comes rather late in disease development, but that doesn’t say that they’re not attempts at metastasis much earlier	1	0	0	0	0	0
in breast cancer, people are pre-programmed towards a certain cancer phenotype	1	0	0	in breast cancer, people are pre-programmed towards a certain cancer phenotype	1	0	0	0	0	0	0	0	0	in breast cancer, people are pre-programmed towards a certain cancer phenotype	0	0	0	1	0	0	in breast cancer, people are pre-programmed towards a certain cancer phenotype	0	0	0	0	0	0	1	0	0	in breast cancer, people are pre-programmed towards a certain cancer phenotype	1	0	0	0	0	0
OTHER GENERAL COMMENTS	6	0	0	OTHER GENERAL COMMENTS	5	0	0	0	0	0	1	0	0	OTHER GENERAL COMMENTS	3	0	0	3	0	0	OTHER GENERAL COMMENTS	2	0	0	4	0	0	0	0	0	OTHER GENERAL COMMENTS	5	0	0	1	0	0
a very good question	3	0	0	a very good question	2	0	0	0	0	0	1	0	0	a very good question	1	0	0	2	0	0	a very good question	0	0	0	3	0	0	0	0	0	a very good question	2	0	0	1	0	0
really difficult question / a complex question	3	0	0	really difficult question / a complex question	3	0	0	0	0	0	0	0	0	really difficult question / a complex question	3	0	0	0	0	0	really difficult question / a complex question	1	0	0	2	0	0	0	0	0	really difficult question / a complex question	3	0	0	0	0	0
you need to target the process more than the genetic events	1	0	0	you need to target the process more than the genetic events	1	0	0	0	0	0	0	0	0	you need to target the process more than the genetic events	0	0	0	1	0	0	you need to target the process more than the genetic events	0	0	0	1	0	0	0	0	0	you need to target the process more than the genetic events	0	0	0	1	0	0
I don’t think there’s a rule. I don’t think a tumor cell has any rules.	1	0	0	I don’t think there’s a rule. I don’t think a tumor cell has any rules.	1	0	0	0	0	0	0	0	0	I don’t think there’s a rule. I don’t think a tumor cell has any rules.	0	0	0	1	0	0	I don’t think there’s a rule. I don’t think a tumor cell has any rules.	1	0	0	0	0	0	0	0	0	I don’t think there’s a rule. I don’t think a tumor cell has any rules.	1	0	0	0	0	0

## Sheet: stage_main-groups
idea	A_all	M_all	D_all	idea	A_phd	M_phd	D_phd	A_md	M_md	D_md	A_mdphd	M_mdphd	D_mdphd	idea	A_men	M_men	D_men	A_women	M_women	D_women	idea	A_upto86	M_upto86	D_upto86	A_from86to95	M_from86to95	D_from86to95	A_after95	M_after95	D_after95	idea	A_phone	M_phone	D_phone	A_inperson	M_inperson	D_inperson
WHEN	25	5	2	WHEN	13	1	1	6	2	1	6	2	0	WHEN	16	3	0	9	2	2	WHEN	8	2	1	9	2	0	8	1	1	WHEN	10	1	0	15	4	2
* early-beginning *	11	0	1	* early-beginning *	4	0	1	3	0	0	4	0	0	* early-beginning *	7	0	0	4	0	1	* early-beginning *	3	0	0	4	0	0	4	0	1	* early-beginning *	5	0	0	6	0	1
* early in tumor development *	2	0	0	* early in tumor development *	1	0	0	1	0	0	0	0	0	* early in tumor development *	2	0	0	0	0	0	* early in tumor development *	2	0	0	0	0	0	0	0	0	* early in tumor development *	0	0	0	2	0	0
* during (and late) tumor development *	2	0	0	* during (and late) tumor development *	1	0	0	1	0	0	0	0	0	* during (and late) tumor development *	2	0	0	0	0	0	* during (and late) tumor development *	2	0	0	0	0	0	0	0	0	* during (and late) tumor development *	0	0	0	2	0	0
* cancer stem cells *	3	4	1	* cancer stem cells *	1	0	0	1	2	1	1	2	0	* cancer stem cells *	3	2	0	0	2	1	* cancer stem cells *	2	1	1	0	2	0	1	1	0	* cancer stem cells *	0	1	0	3	3	1
* at primary tumor *	4	0	0	* at primary tumor *	4	0	0	0	0	0	0	0	0	* at primary tumor *	2	0	0	2	0	0	* at primary tumor *	1	0	0	2	0	0	1	0	0	* at primary tumor *	1	0	0	3	0	0
* throughout *	4	0	0	* throughout *	3	0	0	1	0	0	0	0	0	* throughout *	2	0	0	2	0	0	* throughout *	0	0	0	3	0	0	1	0	0	* throughout *	1	0	0	3	0	0
* when needed - selective pressure *	1	0	0	* when needed - selective pressure *	1	0	0	0	0	0	0	0	0	* when needed - selective pressure *	0	0	0	1	0	0	* when needed - selective pressure *	0	0	0	0	0	0	1	0	0	* when needed - selective pressure *	0	0	0	1	0	0
* pre-present but additional changes needed *	6	0	0	* pre-present but additional changes needed *	3	0	0	1	0	0	2	0	0	* pre-present but additional changes needed *	2	0	0	4	0	0	* pre-present but additional changes needed *	0	0	0	5	0	0	1	0	0	* pre-present but additional changes needed *	3	0	0	3	0	0
* spectrum-varies *	9	1	0	* spectrum-varies *	4	1	0	2	0	0	3	0	0	* spectrum-varies *	8	1	0	1	0	0	* spectrum-varies *	3	1	0	3	0	0	3	0	0	* spectrum-varies *	4	0	0	5	1	0
* either early or after a mutation *	3	0	0	* either early or after a mutation *	3	0	0	0	0	0	0	0	0	* either early or after a mutation *	1	0	0	2	0	0	* either early or after a mutation *	2	0	0	0	0	0	1	0	0	* either early or after a mutation *	2	0	0	1	0	0
* after mutations *	3	1	0	* after mutations *	2	0	0	1	1	0	0	0	0	* after mutations *	2	0	0	1	1	0	* after mutations *	1	1	0	1	0	0	1	0	0	* after mutations *	0	0	0	3	1	0
* don't know *	6	0	0	* don't know *	3	0	0	1	0	0	2	0	0	* don't know *	3	0	0	3	0	0	* don't know *	4	0	0	2	0	0	0	0	0	* don't know *	2	0	0	4	0	0
* other *	1	0	0	* other *	1	0	0	0	0	0	0	0	0	* other *	0	0	0	1	0	0	* other *	0	0	0	0	0	0	1	0	0	* other *	0	0	0	1	0	0
WHICH CELLS	7	1	0	WHICH CELLS	4	0	0	2	0	0	1	1	0	WHICH CELLS	6	1	0	1	0	0	WHICH CELLS	2	0	0	2	0	0	3	1	0	WHICH CELLS	2	0	0	5	1	0
* some cells *	4	1	0	* some cells *	4	0	0	0	0	0	0	1	0	* some cells *	3	1	0	1	0	0	* some cells *	2	0	0	0	0	0	2	1	0	* some cells *	2	0	0	2	1	0
* all cells *	2	0	0	* all cells *	0	0	0	2	0	0	0	0	0	* all cells *	2	0	0	0	0	0	* all cells *	0	0	0	1	0	0	1	0	0	* all cells *	0	0	0	2	0	0
* all cells could but only some do *	1	0	0	* all cells could but only some do *	0	0	0	0	0	0	1	0	0	* all cells could but only some do *	1	0	0	0	0	0	* all cells could but only some do *	0	0	0	1	0	0	0	0	0	* all cells could but only some do *	0	0	0	1	0	0
DEPENDS ON	19	5	3	DEPENDS ON	10	1	1	6	2	1	3	2	1	DEPENDS ON	13	3	3	6	2	0	DEPENDS ON	7	3	1	8	0	0	4	2	2	DEPENDS ON	9	1	2	10	4	1
* cell type *	5	1	0	* cell type *	2	0	0	1	0	0	2	1	0	* cell type *	4	1	0	1	0	0	* cell type *	2	0	0	3	0	0	0	1	0	* cell type *	3	0	0	2	1	0
* tumor type, size, stage *	7	1	3	* tumor type, size, stage *	2	0	1	4	1	1	1	0	1	* tumor type, size, stage *	6	1	3	1	0	0	* tumor type, size, stage *	4	1	1	1	0	0	2	0	2	* tumor type, size, stage *	2	0	2	5	1	1
* organ, site *	1	0	0	* organ, site *	0	0	0	1	0	0	0	0	0	* organ, site *	1	0	0	0	0	0	* organ, site *	0	0	0	0	0	0	1	0	0	* organ, site *	0	0	0	1	0	0
* tissue, stroma, microenvironment *	5	1	0	* tissue, stroma, microenvironment *	3	0	0	1	0	0	1	1	0	* tissue, stroma, microenvironment *	3	1	0	2	0	0	* tissue, stroma, microenvironment *	2	1	0	2	0	0	1	0	0	* tissue, stroma, microenvironment *	4	1	0	1	0	0
* selection, stress/pressure, microenvironment *	6	0	0	* selection, stress/pressure, microenvironment *	4	0	0	1	0	0	1	0	0	* selection, stress/pressure, microenvironment *	4	0	0	2	0	0	* selection, stress/pressure, microenvironment *	2	0	0	1	0	0	3	0	0	* selection, stress/pressure, microenvironment *	2	0	0	4	0	0
* biology, individual's genetics *	6	0	0	* biology, individual's genetics *	3	0	0	2	0	0	1	0	0	* biology, individual's genetics *	4	0	0	2	0	0	* biology, individual's genetics *	2	0	0	3	0	0	1	0	0	* biology, individual's genetics *	4	0	0	2	0	0
* individual's environment *	2	0	0	* individual's environment *	2	0	0	0	0	0	0	0	0	* individual's environment *	2	0	0	0	0	0	* individual's environment *	0	0	0	2	0	0	0	0	0	* individual's environment *	2	0	0	0	0	0
* mutations, molecular and genetic changes *	6	2	0	* mutations, molecular and genetic changes *	5	1	0	0	0	0	1	1	0	* mutations, molecular and genetic changes *	5	1	0	1	1	0	* mutations, molecular and genetic changes *	3	0	0	2	0	0	1	2	0	* mutations, molecular and genetic changes *	5	0	0	1	2	0
* blood supply, lymph/angiogenesis *	3	0	0	* blood supply, lymph/angiogenesis *	1	0	0	1	0	0	1	0	0	* blood supply, lymph/angiogenesis *	2	0	0	1	0	0	* blood supply, lymph/angiogenesis *	0	0	0	3	0	0	0	0	0	* blood supply, lymph/angiogenesis *	2	0	0	1	0	0
* random *	4	0	0	* random *	2	0	0	1	0	0	1	0	0	* random *	3	0	0	1	0	0	* random *	1	0	0	2	0	0	1	0	0	* random *	3	0	0	1	0	0
* combination, many factors throughout *	6	2	0	* combination, many factors throughout *	4	1	0	0	0	0	2	1	0	* combination, many factors throughout *	4	1	0	2	1	0	* combination, many factors throughout *	1	1	0	3	0	0	2	1	0	* combination, many factors throughout *	5	1	0	1	1	0
* don't know *	3	0	0	* don't know *	1	0	0	2	0	0	0	0	0	* don't know *	1	0	0	2	0	0	* don't know *	2	0	0	1	0	0	0	0	0	* don't know *	1	0	0	2	0	0
* ability to escape, move, invade *	3	0	0	* ability to escape, move, invade *	1	0	0	2	0	0	0	0	0	* ability to escape, move, invade *	3	0	0	0	0	0	* ability to escape, move, invade *	1	0	0	1	0	0	1	0	0	* ability to escape, move, invade *	1	0	0	2	0	0
* evade individual's immune system *	2	1	0	* evade individual's immune system *	0	0	0	2	1	0	0	0	0	* evade individual's immune system *	1	0	0	1	1	0	* evade individual's immune system *	1	1	0	0	0	0	1	0	0	* evade individual's immune system *	0	0	0	2	1	0
* pass threshold/barrier *	1	0	0	* pass threshold/barrier *	1	0	0	0	0	0	0	0	0	* pass threshold/barrier *	1	0	0	0	0	0	* pass threshold/barrier *	1	0	0	0	0	0	0	0	0	* pass threshold/barrier *	1	0	0	0	0	0
* loss of suppression *	1	2	0	* loss of suppression *	0	0	0	1	1	0	0	1	0	* loss of suppression *	1	2	0	0	0	0	* loss of suppression *	1	1	0	0	0	0	0	1	0	* loss of suppression *	0	0	0	1	2	0
* signalling *	3	0	0	* signalling *	2	0	0	0	0	0	1	0	0	* signalling *	3	0	0	0	0	0	* signalling *	3	0	0	0	0	0	0	0	0	* signalling *	2	0	0	1	0	0
* ECM proximity *	2	0	0	* ECM proximity *	1	0	0	0	0	0	1	0	0	* ECM proximity *	1	0	0	1	0	0	* ECM proximity *	1	0	0	1	0	0	0	0	0	* ECM proximity *	1	0	0	1	0	0
* other *	1	1	0	* other *	0	0	0	0	0	0	1	1	0	* other *	1	1	0	0	0	0	* other *	0	0	0	0	0	0	1	1	0	* other *	0	0	0	1	1	0
WHAT IS NOT KNOWN	2	0	0	WHAT IS NOT KNOWN	2	0	0	0	0	0	0	0	0	WHAT IS NOT KNOWN	2	0	0	0	0	0	WHAT IS NOT KNOWN	1	0	0	1	0	0	0	0	0	WHAT IS NOT KNOWN	0	0	0	2	0	0
PARTICULAR CANCERS	5	0	0	PARTICULAR CANCERS	3	0	0	2	0	0	0	0	0	PARTICULAR CANCERS	3	0	0	2	0	0	PARTICULAR CANCERS	2	0	0	1	0	0	2	0	0	PARTICULAR CANCERS	3	0	0	2	0	0
OTHER GENERAL COMMENTS	6	0	0	OTHER GENERAL COMMENTS	5	0	0	0	0	0	1	0	0	OTHER GENERAL COMMENTS	3	0	0	3	0	0	OTHER GENERAL COMMENTS	2	0	0	4	0	0	0	0	0	OTHER GENERAL COMMENTS	5	0	0	1	0	0

## Sheet: tropism_all
idea	A_all	M_all	D_all	idea	A_phd	M_phd	D_phd	A_md	M_md	D_md	A_mdphd	M_mdphd	D_mdphd	idea	A_men	M_men	D_men	A_women	M_women	D_women	idea	A_upto86	M_upto86	D_upto86	A_from86to95	M_from86to95	D_from86to95	A_after95	M_after95	D_after95	idea	A_phone	M_phone	D_phone	A_inperson	M_inperson	D_inperson
GENERAL COMMENTS ON TROPISM'S IMPORTANCE	24	3	1	GENERAL COMMENTS ON TROPISM'S IMPORTANCE	11	3	0	7	0	0	6	0	1	GENERAL COMMENTS ON TROPISM'S IMPORTANCE	16	2	1	8	1	0	GENERAL COMMENTS ON TROPISM'S IMPORTANCE	8	2	0	9	1	0	7	0	1	GENERAL COMMENTS ON TROPISM'S IMPORTANCE	9	3	0	15	0	1
there is tropism	5	2	0	there is tropism	2	2	0	2	0	0	1	0	0	there is tropism	4	1	0	1	1	0	there is tropism	2	2	0	2	0	0	1	0	0	there is tropism	3	2	0	2	0	0
examples given (of possible met sites for particular primaries)	8	0	0	examples given (of possible met sites for particular primaries)	4	0	0	2	0	0	2	0	0	examples given (of possible met sites for particular primaries)	4	0	0	4	0	0	examples given (of possible met sites for particular primaries)	3	0	0	3	0	0	2	0	0	examples given (of possible met sites for particular primaries)	3	0	0	5	0	0
discussed particular cancers (but not mentioned potential metastatic site)	2	0	0	discussed particular cancers (but not mentioned potential metastatic site)	1	0	0	1	0	0	0	0	0	discussed particular cancers (but not mentioned potential metastatic site)	1	0	0	1	0	0	discussed particular cancers (but not mentioned potential metastatic site)	1	0	0	1	0	0	0	0	0	discussed particular cancers (but not mentioned potential metastatic site)	0	0	0	2	0	0
interesting question (in general)	3	0	0	interesting question (in general)	1	0	0	2	0	0	0	0	0	interesting question (in general)	3	0	0	0	0	0	interesting question (in general)	1	0	0	2	0	0	0	0	0	interesting question (in general)	1	0	0	2	0	0
interesting question (scientifically)	2	0	0	interesting question (scientifically)	1	0	0	0	0	0	1	0	0	interesting question (scientifically)	2	0	0	0	0	0	interesting question (scientifically)	0	0	0	1	0	0	1	0	0	interesting question (scientifically)	1	0	0	1	0	0
interesting question (clinically, i.e., if we understand it we could target therapy)	10	2	1	interesting question (clinically, i.e., if we understand it we could target therapy)	6	2	0	3	0	0	1	0	1	interesting question (clinically, i.e., if we understand it we could target therapy)	6	2	1	4	0	0	interesting question (clinically, i.e., if we understand it we could target therapy)	3	1	0	4	1	0	3	0	1	interesting question (clinically, i.e., if we understand it we could target therapy)	4	2	0	6	0	1
we can learn a lot from understanding it, important/critical to understand it	14	0	0	we can learn a lot from understanding it, important/critical to understand it	6	0	0	5	0	0	3	0	0	we can learn a lot from understanding it, important/critical to understand it	8	0	0	6	0	0	we can learn a lot from understanding it, important/critical to understand it	5	0	0	5	0	0	4	0	0	we can learn a lot from understanding it, important/critical to understand it	5	0	0	9	0	0
difficult to target tropism	1	0	0	difficult to target tropism	0	0	0	0	0	0	1	0	0	difficult to target tropism	1	0	0	0	0	0	difficult to target tropism	0	0	0	1	0	0	0	0	0	difficult to target tropism	0	0	0	1	0	0
important to target: cells might sit dormant in many/all sites but grow in a few	1	0	0	important to target: cells might sit dormant in many/all sites but grow in a few	1	0	0	0	0	0	0	0	0	important to target: cells might sit dormant in many/all sites but grow in a few	0	0	0	1	0	0	important to target: cells might sit dormant in many/all sites but grow in a few	0	0	0	1	0	0	0	0	0	important to target: cells might sit dormant in many/all sites but grow in a few	0	0	0	1	0	0
too big/descriptive question to get funded, so people are not interested	1	0	0	too big/descriptive question to get funded, so people are not interested	1	0	0	0	0	0	0	0	0	too big/descriptive question to get funded, so people are not interested	0	0	0	1	0	0	too big/descriptive question to get funded, so people are not interested	0	0	0	1	0	0	0	0	0	too big/descriptive question to get funded, so people are not interested	0	0	0	1	0	0
most info comes from in-vitro studies	2	0	0	most info comes from in-vitro studies	1	0	0	0	0	0	1	0	0	most info comes from in-vitro studies	1	0	0	1	0	0	most info comes from in-vitro studies	1	0	0	1	0	0	0	0	0	most info comes from in-vitro studies	1	0	0	1	0	0
the status of the primary tumor can predict therapy sensitivity of metastasis	1	0	0	the status of the primary tumor can predict therapy sensitivity of metastasis	1	0	0	0	0	0	0	0	0	the status of the primary tumor can predict therapy sensitivity of metastasis	1	0	0	0	0	0	the status of the primary tumor can predict therapy sensitivity of metastasis	1	0	0	0	0	0	0	0	0	the status of the primary tumor can predict therapy sensitivity of metastasis	0	0	0	1	0	0
GENERAL COMMENTS ON TROPISM'S MECHANISM	4	2	0	GENERAL COMMENTS ON TROPISM'S MECHANISM	3	2	0	1	0	0	0	0	0	GENERAL COMMENTS ON TROPISM'S MECHANISM	1	0	0	3	2	0	GENERAL COMMENTS ON TROPISM'S MECHANISM	2	0	0	2	2	0	0	0	0	GENERAL COMMENTS ON TROPISM'S MECHANISM	2	0	0	2	2	0
stochastic process: cells go everywhere but can only grow in some sites	3	1	0	stochastic process: cells go everywhere but can only grow in some sites	3	1	0	0	0	0	0	0	0	stochastic process: cells go everywhere but can only grow in some sites	1	0	0	2	1	0	stochastic process: cells go everywhere but can only grow in some sites	2	0	0	1	1	0	0	0	0	stochastic process: cells go everywhere but can only grow in some sites	2	0	0	1	1	0
cells don't grow out immediatelly at metastatic site	1	0	0	cells don't grow out immediatelly at metastatic site	1	0	0	0	0	0	0	0	0	cells don't grow out immediatelly at metastatic site	0	0	0	1	0	0	cells don't grow out immediatelly at metastatic site	0	0	0	1	0	0	0	0	0	cells don't grow out immediatelly at metastatic site	0	0	0	1	0	0
cells can sit dormant in all site but grow in a few sites	1	1	0	cells can sit dormant in all site but grow in a few sites	1	1	0	0	0	0	0	0	0	cells can sit dormant in all site but grow in a few sites	1	0	0	0	1	0	cells can sit dormant in all site but grow in a few sites	1	0	0	0	1	0	0	0	0	cells can sit dormant in all site but grow in a few sites	1	0	0	0	1	0
dormant cells can go back to circulation (and grow in other sites)	0	1	0	dormant cells can go back to circulation (and grow in other sites)	0	1	0	0	0	0	0	0	0	dormant cells can go back to circulation (and grow in other sites)	0	0	0	0	1	0	dormant cells can go back to circulation (and grow in other sites)	0	0	0	0	1	0	0	0	0	dormant cells can go back to circulation (and grow in other sites)	0	0	0	0	1	0
not all micro-mets become macro-mets	1	0	0	not all micro-mets become macro-mets	1	0	0	0	0	0	0	0	0	not all micro-mets become macro-mets	0	0	0	1	0	0	not all micro-mets become macro-mets	0	0	0	1	0	0	0	0	0	not all micro-mets become macro-mets	0	0	0	1	0	0
there is primary-to-metastasis & metastasis-to-metastasis	1	0	0	there is primary-to-metastasis & metastasis-to-metastasis	0	0	0	1	0	0	0	0	0	there is primary-to-metastasis & metastasis-to-metastasis	0	0	0	1	0	0	there is primary-to-metastasis & metastasis-to-metastasis	0	0	0	1	0	0	0	0	0	there is primary-to-metastasis & metastasis-to-metastasis	0	0	0	1	0	0
OTHER	1	0	0	OTHER	1	0	0	0	0	0	0	0	0	OTHER	0	0	0	1	0	0	OTHER	0	0	0	0	0	0	1	0	0	OTHER	1	0	0	0	0	0
there are examples or of tumor cells using the stromal cells and chemicals to expand and escape from the primary	1	0	0	there are examples or of tumor cells using the stromal cells and chemicals to expand and escape from the primary	1	0	0	0	0	0	0	0	0	there are examples or of tumor cells using the stromal cells and chemicals to expand and escape from the primary	0	0	0	1	0	0	there are examples or of tumor cells using the stromal cells and chemicals to expand and escape from the primary	0	0	0	0	0	0	1	0	0	there are examples or of tumor cells using the stromal cells and chemicals to expand and escape from the primary	1	0	0	0	0	0
TROPISM FACTORS	28	9	3	TROPISM FACTORS	15	6	1	7	2	0	6	1	2	TROPISM FACTORS	19	5	3	9	4	0	TROPISM FACTORS	9	3	2	11	2	1	8	4	0	TROPISM FACTORS	12	2	2	16	7	1
we don't know, don't have an answer why go to and grow at certain sites	10	0	0	we don't know, don't have an answer why go to and grow at certain sites	4	0	0	4	0	0	2	0	0	we don't know, don't have an answer why go to and grow at certain sites	6	0	0	4	0	0	we don't know, don't have an answer why go to and grow at certain sites	4	0	0	3	0	0	3	0	0	we don't know, don't have an answer why go to and grow at certain sites	3	0	0	7	0	0
not a single explanation, a combination of things	9	0	0	not a single explanation, a combination of things	7	0	0	0	0	0	2	0	0	not a single explanation, a combination of things	7	0	0	2	0	0	not a single explanation, a combination of things	5	0	0	3	0	0	1	0	0	not a single explanation, a combination of things	6	0	0	3	0	0
* similar biology of primary & metastatic sites *	6	1	0	* similar biology of primary & metastatic sites *	4	0	0	1	1	0	1	0	0	* similar biology of primary & metastatic sites *	6	1	0	0	0	0	* similar biology of primary & metastatic sites *	1	1	0	3	0	0	2	0	0	* similar biology of primary & metastatic sites *	3	0	0	3	1	0
there is an important relationship between primary and metastatic sites	2	0	0	there is an important relationship between primary and metastatic sites	2	0	0	0	0	0	0	0	0	there is an important relationship between primary and metastatic sites	2	0	0	0	0	0	there is an important relationship between primary and metastatic sites	1	0	0	0	0	0	1	0	0	there is an important relationship between primary and metastatic sites	1	0	0	1	0	0
primary tumors develop certain metastatic cells with receptors or mechanisms for particular sites	0	1	0	primary tumors develop certain metastatic cells with receptors or mechanisms for particular sites	0	0	0	0	1	0	0	0	0	primary tumors develop certain metastatic cells with receptors or mechanisms for particular sites	0	1	0	0	0	0	primary tumors develop certain metastatic cells with receptors or mechanisms for particular sites	0	1	0	0	0	0	0	0	0	primary tumors develop certain metastatic cells with receptors or mechanisms for particular sites	0	0	0	0	1	0
molecular factors / some of the biology of primary is a factor, similar to metastatic site	4	0	0	molecular factors / some of the biology of primary is a factor, similar to metastatic site	2	0	0	1	0	0	1	0	0	molecular factors / some of the biology of primary is a factor, similar to metastatic site	4	0	0	0	0	0	molecular factors / some of the biology of primary is a factor, similar to metastatic site	0	0	0	3	0	0	1	0	0	molecular factors / some of the biology of primary is a factor, similar to metastatic site	2	0	0	2	0	0
metastatic cells are similar to primary (but not 100% , certain things are different)	2	0	0	metastatic cells are similar to primary (but not 100% , certain things are different)	2	0	0	0	0	0	0	0	0	metastatic cells are similar to primary (but not 100% , certain things are different)	2	0	0	0	0	0	metastatic cells are similar to primary (but not 100% , certain things are different)	1	0	0	1	0	0	0	0	0	metastatic cells are similar to primary (but not 100% , certain things are different)	1	0	0	1	0	0
* genetic *	3	1	0	* genetic *	2	0	0	0	1	0	1	0	0	* genetic *	3	1	0	0	0	0	* genetic *	2	0	0	1	0	0	0	1	0	* genetic *	2	0	0	1	1	0
due to genetic different signatures	0	1	0	due to genetic different signatures	0	0	0	0	1	0	0	0	0	due to genetic different signatures	0	1	0	0	0	0	due to genetic different signatures	0	0	0	0	0	0	0	1	0	due to genetic different signatures	0	0	0	0	1	0
due to genotypical changes of different tumors	1	0	0	due to genotypical changes of different tumors	1	0	0	0	0	0	0	0	0	due to genotypical changes of different tumors	1	0	0	0	0	0	due to genotypical changes of different tumors	1	0	0	0	0	0	0	0	0	due to genotypical changes of different tumors	0	0	0	1	0	0
part is due to inherent ability of cancer cells to metastasize	1	0	0	part is due to inherent ability of cancer cells to metastasize	0	0	0	0	0	0	1	0	0	part is due to inherent ability of cancer cells to metastasize	1	0	0	0	0	0	part is due to inherent ability of cancer cells to metastasize	1	0	0	0	0	0	0	0	0	part is due to inherent ability of cancer cells to metastasize	1	0	0	0	0	0
there are changes and mutations ate both seed and soil level	1	0	0	there are changes and mutations ate both seed and soil level	1	0	0	0	0	0	0	0	0	there are changes and mutations ate both seed and soil level	1	0	0	0	0	0	there are changes and mutations ate both seed and soil level	0	0	0	1	0	0	0	0	0	there are changes and mutations ate both seed and soil level	1	0	0	0	0	0
* circulation *	7	1	2	* circulation *	4	1	0	1	0	0	2	0	2	* circulation *	5	0	2	2	1	0	* circulation *	1	0	1	3	0	1	3	1	0	* circulation *	4	1	1	3	0	1
circulation is a factor - i.e., where finds first cappilaries, passive physical route, physiology, drainage	7	0	2	circulation is a factor - i.e., where finds first cappilaries, passive physical route, physiology, drainage	4	0	0	1	0	0	2	0	2	circulation is a factor - i.e., where finds first cappilaries, passive physical route, physiology, drainage	5	0	2	2	0	0	circulation is a factor - i.e., where finds first cappilaries, passive physical route, physiology, drainage	1	0	1	3	0	1	3	0	0	circulation is a factor - i.e., where finds first cappilaries, passive physical route, physiology, drainage	4	0	1	3	0	1
there are evidence/examples that don't follow circulation	2	0	0	there are evidence/examples that don't follow circulation	1	0	0	1	0	0	0	0	0	there are evidence/examples that don't follow circulation	2	0	0	0	0	0	there are evidence/examples that don't follow circulation	0	0	0	1	0	0	1	0	0	there are evidence/examples that don't follow circulation	1	0	0	1	0	0
blood flow is not symmetrical so maybe cells get trapped in some organs	0	1	0	blood flow is not symmetrical so maybe cells get trapped in some organs	0	1	0	0	0	0	0	0	0	blood flow is not symmetrical so maybe cells get trapped in some organs	0	0	0	0	1	0	blood flow is not symmetrical so maybe cells get trapped in some organs	0	0	0	0	0	0	0	1	0	blood flow is not symmetrical so maybe cells get trapped in some organs	0	1	0	0	0	0
* stickiness *	3	0	0	* stickiness *	2	0	0	1	0	0	0	0	0	* stickiness *	3	0	0	0	0	0	* stickiness *	0	0	0	3	0	0	0	0	0	* stickiness *	1	0	0	2	0	0
depends on endothelial cells and surface proteins of tumor cells (eg integrin molecules) allowing them to stick to capillaries	2	0	0	depends on endothelial cells and surface proteins of tumor cells (eg integrin molecules) allowing them to stick to capillaries	1	0	0	1	0	0	0	0	0	depends on endothelial cells and surface proteins of tumor cells (eg integrin molecules) allowing them to stick to capillaries	2	0	0	0	0	0	depends on endothelial cells and surface proteins of tumor cells (eg integrin molecules) allowing them to stick to capillaries	0	0	0	2	0	0	0	0	0	depends on endothelial cells and surface proteins of tumor cells (eg integrin molecules) allowing them to stick to capillaries	1	0	0	1	0	0
different endothelial cells in different cappilaries, different organs, different tissues, so the stick to different ones / different affinity (hemophoric cells and chemial gradients prepopulate the site)	2	1	0	different endothelial cells in different cappilaries, different organs, different tissues, so the stick to different ones / different affinity (hemophoric cells and chemial gradients prepopulate the site)	1	1	0	1	0	0	0	0	0	different endothelial cells in different cappilaries, different organs, different tissues, so the stick to different ones / different affinity (hemophoric cells and chemial gradients prepopulate the site)	2	0	0	0	1	0	different endothelial cells in different cappilaries, different organs, different tissues, so the stick to different ones / different affinity (hemophoric cells and chemial gradients prepopulate the site)	0	0	0	2	1	0	0	0	0	different endothelial cells in different cappilaries, different organs, different tissues, so the stick to different ones / different affinity (hemophoric cells and chemial gradients prepopulate the site)	0	0	0	2	1	0
* microenvironment *	16	2	0	* microenvironment *	9	2	0	4	0	0	3	0	0	* microenvironment *	11	1	0	5	1	0	* microenvironment *	6	1	0	8	1	0	2	0	0	* microenvironment *	8	0	0	8	2	0
somehing about the site, stromal cells, preparing, predisposing for landing there / right microenvironment / niche/ there: cytokines, trophic/growth factors…	13	1	0	somehing about the site, stromal cells, preparing, predisposing for landing there / right microenvironment / niche/ there: cytokines, trophic/growth factors…	7	1	0	3	0	0	3	0	0	somehing about the site, stromal cells, preparing, predisposing for landing there / right microenvironment / niche/ there: cytokines, trophic/growth factors…	11	0	0	2	1	0	somehing about the site, stromal cells, preparing, predisposing for landing there / right microenvironment / niche/ there: cytokines, trophic/growth factors…	5	0	0	6	1	0	2	0	0	somehing about the site, stromal cells, preparing, predisposing for landing there / right microenvironment / niche/ there: cytokines, trophic/growth factors…	8	0	0	5	1	0
the environment of the organ is the most important (more tumor cell aggression, communication or proximity)	2	2	0	the environment of the organ is the most important (more tumor cell aggression, communication or proximity)	1	2	0	1	0	0	0	0	0	the environment of the organ is the most important (more tumor cell aggression, communication or proximity)	0	1	0	2	1	0	the environment of the organ is the most important (more tumor cell aggression, communication or proximity)	0	1	0	2	1	0	0	0	0	the environment of the organ is the most important (more tumor cell aggression, communication or proximity)	0	0	0	2	2	0
several molecules are associated with lodging and survival at metastatic distant sites	1	0	0	several molecules are associated with lodging and survival at metastatic distant sites	1	0	0	0	0	0	0	0	0	several molecules are associated with lodging and survival at metastatic distant sites	0	0	0	1	0	0	several molecules are associated with lodging and survival at metastatic distant sites	0	0	0	1	0	0	0	0	0	several molecules are associated with lodging and survival at metastatic distant sites	0	0	0	1	0	0
depends not on just what molecules are at the metastatic site but also how they are presented, organized, and structured too	1	0	0	depends not on just what molecules are at the metastatic site but also how they are presented, organized, and structured too	1	0	0	0	0	0	0	0	0	depends not on just what molecules are at the metastatic site but also how they are presented, organized, and structured too	0	0	0	1	0	0	depends not on just what molecules are at the metastatic site but also how they are presented, organized, and structured too	0	0	0	1	0	0	0	0	0	depends not on just what molecules are at the metastatic site but also how they are presented, organized, and structured too	0	0	0	1	0	0
right microenvironment (cytokines etc) make tumor cells to break out of dormancy	1	0	0	right microenvironment (cytokines etc) make tumor cells to break out of dormancy	1	0	0	0	0	0	0	0	0	right microenvironment (cytokines etc) make tumor cells to break out of dormancy	1	0	0	0	0	0	right microenvironment (cytokines etc) make tumor cells to break out of dormancy	0	0	0	1	0	0	0	0	0	right microenvironment (cytokines etc) make tumor cells to break out of dormancy	1	0	0	0	0	0
there is difference between metastatic sites of same primary in terms of how lethal it is	1	0	0	there is difference between metastatic sites of same primary in terms of how lethal it is	0	0	0	1	0	0	0	0	0	there is difference between metastatic sites of same primary in terms of how lethal it is	0	0	0	1	0	0	there is difference between metastatic sites of same primary in terms of how lethal it is	1	0	0	0	0	0	0	0	0	there is difference between metastatic sites of same primary in terms of how lethal it is	0	0	0	1	0	0
growth at distant site (right microenvironment) could be due to either positive (stimulating) or negative (sart prolifaration to survive hostile environment) effect	1	0	0	growth at distant site (right microenvironment) could be due to either positive (stimulating) or negative (sart prolifaration to survive hostile environment) effect	1	0	0	0	0	0	0	0	0	growth at distant site (right microenvironment) could be due to either positive (stimulating) or negative (sart prolifaration to survive hostile environment) effect	1	0	0	0	0	0	growth at distant site (right microenvironment) could be due to either positive (stimulating) or negative (sart prolifaration to survive hostile environment) effect	0	0	0	1	0	0	0	0	0	growth at distant site (right microenvironment) could be due to either positive (stimulating) or negative (sart prolifaration to survive hostile environment) effect	1	0	0	0	0	0
* seed and soil *	7	0	0	* seed and soil *	5	0	0	1	0	0	1	0	0	* seed and soil *	3	0	0	4	0	0	* seed and soil *	2	0	0	1	0	0	4	0	0	* seed and soil *	5	0	0	2	0	0
seed and soil hypothesis, i.e., aggressive metastatic cell and right microenvironment	6	0	0	seed and soil hypothesis, i.e., aggressive metastatic cell and right microenvironment	4	0	0	1	0	0	1	0	0	seed and soil hypothesis, i.e., aggressive metastatic cell and right microenvironment	3	0	0	3	0	0	seed and soil hypothesis, i.e., aggressive metastatic cell and right microenvironment	2	0	0	1	0	0	3	0	0	seed and soil hypothesis, i.e., aggressive metastatic cell and right microenvironment	5	0	0	1	0	0
seed and soil is just an idea	1	0	0	seed and soil is just an idea	1	0	0	0	0	0	0	0	0	seed and soil is just an idea	0	0	0	1	0	0	seed and soil is just an idea	0	0	0	0	0	0	1	0	0	seed and soil is just an idea	0	0	0	1	0	0
it is the interaction of metastatic tumor cells and site they go to (both of them)	1	0	0	it is the interaction of metastatic tumor cells and site they go to (both of them)	0	0	0	0	0	0	1	0	0	it is the interaction of metastatic tumor cells and site they go to (both of them)	1	0	0	0	0	0	it is the interaction of metastatic tumor cells and site they go to (both of them)	1	0	0	0	0	0	0	0	0	it is the interaction of metastatic tumor cells and site they go to (both of them)	1	0	0	0	0	0
it is the plasticity of tumor cell and the microenvironment	1	0	0	it is the plasticity of tumor cell and the microenvironment	0	0	0	0	0	0	1	0	0	it is the plasticity of tumor cell and the microenvironment	1	0	0	0	0	0	it is the plasticity of tumor cell and the microenvironment	1	0	0	0	0	0	0	0	0	it is the plasticity of tumor cell and the microenvironment	1	0	0	0	0	0
* chemical communication *	3	1	1	* chemical communication *	3	1	1	0	0	0	0	0	0	* chemical communication *	2	1	1	1	0	0	* chemical communication *	0	1	1	1	0	0	2	0	0	* chemical communication *	2	1	1	1	0	0
chemical communication between tumor cells & metastatic site (chemokines, cytokines, biological signals…)	2	0	0	chemical communication between tumor cells & metastatic site (chemokines, cytokines, biological signals…)	2	0	0	0	0	0	0	0	0	chemical communication between tumor cells & metastatic site (chemokines, cytokines, biological signals…)	2	0	0	0	0	0	chemical communication between tumor cells & metastatic site (chemokines, cytokines, biological signals…)	0	0	0	1	0	0	1	0	0	chemical communication between tumor cells & metastatic site (chemokines, cytokines, biological signals…)	2	0	0	0	0	0
chemical communication in some cases	1	0	0	chemical communication in some cases	1	0	0	0	0	0	0	0	0	chemical communication in some cases	0	0	0	1	0	0	chemical communication in some cases	0	0	0	0	0	0	1	0	0	chemical communication in some cases	0	0	0	1	0	0
primary tumor controls chemical communication	1	1	1	primary tumor controls chemical communication	1	1	1	0	0	0	0	0	0	primary tumor controls chemical communication	1	1	1	0	0	0	primary tumor controls chemical communication	0	1	1	0	0	0	1	0	0	primary tumor controls chemical communication	1	1	1	0	0	0
primary tumor controls chemical communication in some cases	1	0	0	primary tumor controls chemical communication in some cases	1	0	0	0	0	0	0	0	0	primary tumor controls chemical communication in some cases	0	0	0	1	0	0	primary tumor controls chemical communication in some cases	0	0	0	0	0	0	1	0	0	primary tumor controls chemical communication in some cases	0	0	0	1	0	0
* developmental connection *	2	2	0	* developmental connection *	1	1	0	1	1	0	0	0	0	* developmental connection *	2	1	0	0	1	0	* developmental connection *	0	0	0	1	0	0	1	2	0	* developmental connection *	0	1	0	2	1	0
extends to development, somehow the two sites are related	0	2	0	extends to development, somehow the two sites are related	0	1	0	0	1	0	0	0	0	extends to development, somehow the two sites are related	0	1	0	0	1	0	extends to development, somehow the two sites are related	0	0	0	0	0	0	0	2	0	extends to development, somehow the two sites are related	0	1	0	0	1	0
developmental functions that control distribution are back on	1	0	0	developmental functions that control distribution are back on	0	0	0	1	0	0	0	0	0	developmental functions that control distribution are back on	1	0	0	0	0	0	developmental functions that control distribution are back on	0	0	0	0	0	0	1	0	0	developmental functions that control distribution are back on	0	0	0	1	0	0
not a property that the cancer cell invented, too complex, must be from something else like embryonic development	1	0	0	not a property that the cancer cell invented, too complex, must be from something else like embryonic development	1	0	0	0	0	0	0	0	0	not a property that the cancer cell invented, too complex, must be from something else like embryonic development	1	0	0	0	0	0	not a property that the cancer cell invented, too complex, must be from something else like embryonic development	0	0	0	1	0	0	0	0	0	not a property that the cancer cell invented, too complex, must be from something else like embryonic development	0	0	0	1	0	0
* selection *	2	0	0	* selection *	2	0	0	0	0	0	0	0	0	* selection *	2	0	0	0	0	0	* selection *	1	0	0	1	0	0	0	0	0	* selection *	2	0	0	0	0	0
there is some selection for growth at certain organs	1	0	0	there is some selection for growth at certain organs	1	0	0	0	0	0	0	0	0	there is some selection for growth at certain organs	1	0	0	0	0	0	there is some selection for growth at certain organs	0	0	0	1	0	0	0	0	0	there is some selection for growth at certain organs	1	0	0	0	0	0
there is selection for survival of tumor cells	1	0	0	there is selection for survival of tumor cells	1	0	0	0	0	0	0	0	0	there is selection for survival of tumor cells	1	0	0	0	0	0	there is selection for survival of tumor cells	1	0	0	0	0	0	0	0	0	there is selection for survival of tumor cells	1	0	0	0	0	0
* blood supply *	2	0	0	* blood supply *	1	0	0	0	0	0	1	0	0	* blood supply *	2	0	0	0	0	0	* blood supply *	0	0	0	1	0	0	1	0	0	* blood supply *	1	0	0	1	0	0
preference for sites exposed to blood supply	2	0	0	preference for sites exposed to blood supply	1	0	0	0	0	0	1	0	0	preference for sites exposed to blood supply	2	0	0	0	0	0	preference for sites exposed to blood supply	0	0	0	1	0	0	1	0	0	preference for sites exposed to blood supply	1	0	0	1	0	0
preference for sites exposed to blood supply but there are exemptions (eg bone)	1	0	0	preference for sites exposed to blood supply but there are exemptions (eg bone)	0	0	0	0	0	0	1	0	0	preference for sites exposed to blood supply but there are exemptions (eg bone)	1	0	0	0	0	0	preference for sites exposed to blood supply but there are exemptions (eg bone)	0	0	0	0	0	0	1	0	0	preference for sites exposed to blood supply but there are exemptions (eg bone)	0	0	0	1	0	0
* other factors/reasons*	3	3	0	* other factors/reasons*	2	2	0	0	0	0	1	1	0	* other factors/reasons*	3	1	0	0	2	0	* other factors/reasons*	1	0	0	1	1	0	1	2	0	* other factors/reasons*	2	0	0	1	3	0
goes where the immune system is weak	0	1	0	goes where the immune system is weak	0	0	0	0	0	0	0	1	0	goes where the immune system is weak	0	1	0	0	0	0	goes where the immune system is weak	0	0	0	0	0	0	0	1	0	goes where the immune system is weak	0	0	0	0	1	0
barriers/threshold to colonize is different in different organs	1	0	0	barriers/threshold to colonize is different in different organs	0	0	0	0	0	0	1	0	0	barriers/threshold to colonize is different in different organs	1	0	0	0	0	0	barriers/threshold to colonize is different in different organs	0	0	0	0	0	0	1	0	0	barriers/threshold to colonize is different in different organs	0	0	0	1	0	0
statistical reason, more cells in proximity found at certain organs	0	1	0	statistical reason, more cells in proximity found at certain organs	0	1	0	0	0	0	0	0	0	statistical reason, more cells in proximity found at certain organs	0	0	0	0	1	0	statistical reason, more cells in proximity found at certain organs	0	0	0	0	1	0	0	0	0	statistical reason, more cells in proximity found at certain organs	0	0	0	0	1	0
due to physical constrains, the biomechanics of particular sites	0	1	0	due to physical constrains, the biomechanics of particular sites	0	1	0	0	0	0	0	0	0	due to physical constrains, the biomechanics of particular sites	0	0	0	0	1	0	due to physical constrains, the biomechanics of particular sites	0	0	0	0	0	0	0	1	0	due to physical constrains, the biomechanics of particular sites	0	0	0	0	1	0
removal of primary can stimulate angiogenesis at metastatic site, therefore growth	1	0	0	removal of primary can stimulate angiogenesis at metastatic site, therefore growth	1	0	0	0	0	0	0	0	0	removal of primary can stimulate angiogenesis at metastatic site, therefore growth	1	0	0	0	0	0	removal of primary can stimulate angiogenesis at metastatic site, therefore growth	1	0	0	0	0	0	0	0	0	removal of primary can stimulate angiogenesis at metastatic site, therefore growth	1	0	0	0	0	0
depends on organ	1	0	0	depends on organ	1	0	0	0	0	0	0	0	0	depends on organ	1	0	0	0	0	0	depends on organ	0	0	0	1	0	0	0	0	0	depends on organ	1	0	0	0	0	0
depends on individual (patient)	1	0	0	depends on individual (patient)	1	0	0	0	0	0	0	0	0	depends on individual (patient)	1	0	0	0	0	0	depends on individual (patient)	0	0	0	1	0	0	0	0	0	depends on individual (patient)	1	0	0	0	0	0

## Sheet: tropism_main-groups
idea	A_all	M_all	D_all	idea	A_phd	M_phd	D_phd	A_md	M_md	D_md	A_mdphd	M_mdphd	D_mdphd	idea	A_men	M_men	D_men	A_women	M_women	D_women	idea	A_upto86	M_upto86	D_upto86	A_from86to95	M_from86to95	D_from86to95	A_after95	M_after95	D_after95	idea	A_phone	M_phone	D_phone	A_inperson	M_inperson	D_inperson
GENERAL COMMENTS ON TROPISM'S IMPORTANCE	24	3	1	GENERAL COMMENTS ON TROPISM'S IMPORTANCE	11	3	0	7	0	0	6	0	1	GENERAL COMMENTS ON TROPISM'S IMPORTANCE	16	2	1	8	1	0	GENERAL COMMENTS ON TROPISM'S IMPORTANCE	8	2	0	9	1	0	7	0	1	GENERAL COMMENTS ON TROPISM'S IMPORTANCE	9	3	0	15	0	1
there is tropism	5	2	0	there is tropism	2	2	0	2	0	0	1	0	0	there is tropism	4	1	0	1	1	0	there is tropism	2	2	0	2	0	0	1	0	0	there is tropism	3	2	0	2	0	0
examples given (of possible met sites for particular primaries)	8	0	0	examples given (of possible met sites for particular primaries)	4	0	0	2	0	0	2	0	0	examples given (of possible met sites for particular primaries)	4	0	0	4	0	0	examples given (of possible met sites for particular primaries)	3	0	0	3	0	0	2	0	0	examples given (of possible met sites for particular primaries)	3	0	0	5	0	0
discussed particular cancers (but not mentioned potential metastatic site)	2	0	0	discussed particular cancers (but not mentioned potential metastatic site)	1	0	0	1	0	0	0	0	0	discussed particular cancers (but not mentioned potential metastatic site)	1	0	0	1	0	0	discussed particular cancers (but not mentioned potential metastatic site)	1	0	0	1	0	0	0	0	0	discussed particular cancers (but not mentioned potential metastatic site)	0	0	0	2	0	0
interesting question (in general)	3	0	0	interesting question (in general)	1	0	0	2	0	0	0	0	0	interesting question (in general)	3	0	0	0	0	0	interesting question (in general)	1	0	0	2	0	0	0	0	0	interesting question (in general)	1	0	0	2	0	0
interesting question (scientifically)	2	0	0	interesting question (scientifically)	1	0	0	0	0	0	1	0	0	interesting question (scientifically)	2	0	0	0	0	0	interesting question (scientifically)	0	0	0	1	0	0	1	0	0	interesting question (scientifically)	1	0	0	1	0	0
interesting question (clinically, i.e., if we understand it we could target therapy)	10	2	1	interesting question (clinically, i.e., if we understand it we could target therapy)	6	2	0	3	0	0	1	0	1	interesting question (clinically, i.e., if we understand it we could target therapy)	6	2	1	4	0	0	interesting question (clinically, i.e., if we understand it we could target therapy)	3	1	0	4	1	0	3	0	1	interesting question (clinically, i.e., if we understand it we could target therapy)	4	2	0	6	0	1
we can learn a lot from understanding it, important/critical to understand it	14	0	0	we can learn a lot from understanding it, important/critical to understand it	6	0	0	5	0	0	3	0	0	we can learn a lot from understanding it, important/critical to understand it	8	0	0	6	0	0	we can learn a lot from understanding it, important/critical to understand it	5	0	0	5	0	0	4	0	0	we can learn a lot from understanding it, important/critical to understand it	5	0	0	9	0	0
difficult to target tropism	1	0	0	difficult to target tropism	0	0	0	0	0	0	1	0	0	difficult to target tropism	1	0	0	0	0	0	difficult to target tropism	0	0	0	1	0	0	0	0	0	difficult to target tropism	0	0	0	1	0	0
important to target: cells might sit dormant in many/all sites but grow in a few	1	0	0	important to target: cells might sit dormant in many/all sites but grow in a few	1	0	0	0	0	0	0	0	0	important to target: cells might sit dormant in many/all sites but grow in a few	0	0	0	1	0	0	important to target: cells might sit dormant in many/all sites but grow in a few	0	0	0	1	0	0	0	0	0	important to target: cells might sit dormant in many/all sites but grow in a few	0	0	0	1	0	0
too big/descriptive question to get funded, so people are not interested	1	0	0	too big/descriptive question to get funded, so people are not interested	1	0	0	0	0	0	0	0	0	too big/descriptive question to get funded, so people are not interested	0	0	0	1	0	0	too big/descriptive question to get funded, so people are not interested	0	0	0	1	0	0	0	0	0	too big/descriptive question to get funded, so people are not interested	0	0	0	1	0	0
most info comes from in-vitro studies	2	0	0	most info comes from in-vitro studies	1	0	0	0	0	0	1	0	0	most info comes from in-vitro studies	1	0	0	1	0	0	most info comes from in-vitro studies	1	0	0	1	0	0	0	0	0	most info comes from in-vitro studies	1	0	0	1	0	0
the status of the primary tumor can predict therapy sensitivity of metastasis	1	0	0	the status of the primary tumor can predict therapy sensitivity of metastasis	1	0	0	0	0	0	0	0	0	the status of the primary tumor can predict therapy sensitivity of metastasis	1	0	0	0	0	0	the status of the primary tumor can predict therapy sensitivity of metastasis	1	0	0	0	0	0	0	0	0	the status of the primary tumor can predict therapy sensitivity of metastasis	0	0	0	1	0	0
GENERAL COMMENTS ON TROPISM'S MECHANISM	4	2	0	GENERAL COMMENTS ON TROPISM'S MECHANISM	3	2	0	1	0	0	0	0	0	GENERAL COMMENTS ON TROPISM'S MECHANISM	1	0	0	3	2	0	GENERAL COMMENTS ON TROPISM'S MECHANISM	2	0	0	2	2	0	0	0	0	GENERAL COMMENTS ON TROPISM'S MECHANISM	2	0	0	2	2	0
stochastic process: cells go everywhere but can only grow in some sites	3	1	0	stochastic process: cells go everywhere but can only grow in some sites	3	1	0	0	0	0	0	0	0	stochastic process: cells go everywhere but can only grow in some sites	1	0	0	2	1	0	stochastic process: cells go everywhere but can only grow in some sites	2	0	0	1	1	0	0	0	0	stochastic process: cells go everywhere but can only grow in some sites	2	0	0	1	1	0
cells don't grow out immediatelly at metastatic site	1	0	0	cells don't grow out immediatelly at metastatic site	1	0	0	0	0	0	0	0	0	cells don't grow out immediatelly at metastatic site	0	0	0	1	0	0	cells don't grow out immediatelly at metastatic site	0	0	0	1	0	0	0	0	0	cells don't grow out immediatelly at metastatic site	0	0	0	1	0	0
cells can sit dormant in all site but grow in a few sites	1	1	0	cells can sit dormant in all site but grow in a few sites	1	1	0	0	0	0	0	0	0	cells can sit dormant in all site but grow in a few sites	1	0	0	0	1	0	cells can sit dormant in all site but grow in a few sites	1	0	0	0	1	0	0	0	0	cells can sit dormant in all site but grow in a few sites	1	0	0	0	1	0
dormant cells can go back to circulation (and grow in other sites)	0	1	0	dormant cells can go back to circulation (and grow in other sites)	0	1	0	0	0	0	0	0	0	dormant cells can go back to circulation (and grow in other sites)	0	0	0	0	1	0	dormant cells can go back to circulation (and grow in other sites)	0	0	0	0	1	0	0	0	0	dormant cells can go back to circulation (and grow in other sites)	0	0	0	0	1	0
not all micro-mets become macro-mets	1	0	0	not all micro-mets become macro-mets	1	0	0	0	0	0	0	0	0	not all micro-mets become macro-mets	0	0	0	1	0	0	not all micro-mets become macro-mets	0	0	0	1	0	0	0	0	0	not all micro-mets become macro-mets	0	0	0	1	0	0
there is primary-to-metastasis & metastasis-to-metastasis	1	0	0	there is primary-to-metastasis & metastasis-to-metastasis	0	0	0	1	0	0	0	0	0	there is primary-to-metastasis & metastasis-to-metastasis	0	0	0	1	0	0	there is primary-to-metastasis & metastasis-to-metastasis	0	0	0	1	0	0	0	0	0	there is primary-to-metastasis & metastasis-to-metastasis	0	0	0	1	0	0
TROPISM FACTORS	28	9	3	TROPISM FACTORS	15	6	1	7	2	0	6	1	2	TROPISM FACTORS	19	5	3	9	4	0	TROPISM FACTORS	9	3	2	11	2	1	8	4	0	TROPISM FACTORS	12	2	2	16	7	1
we don't know, don't have an answer why go to and grow at certain sites	10	0	0	we don't know, don't have an answer why go to and grow at certain sites	4	0	0	4	0	0	2	0	0	we don't know, don't have an answer why go to and grow at certain sites	6	0	0	4	0	0	we don't know, don't have an answer why go to and grow at certain sites	4	0	0	3	0	0	3	0	0	we don't know, don't have an answer why go to and grow at certain sites	3	0	0	7	0	0
not a single explanation, a combination of things	9	0	0	not a single explanation, a combination of things	7	0	0	0	0	0	2	0	0	not a single explanation, a combination of things	7	0	0	2	0	0	not a single explanation, a combination of things	5	0	0	3	0	0	1	0	0	not a single explanation, a combination of things	6	0	0	3	0	0
* similar biology of primary & metastatic sites *	6	1	0	* similar biology of primary & metastatic sites *	4	0	0	1	1	0	1	0	0	* similar biology of primary & metastatic sites *	6	1	0	0	0	0	* similar biology of primary & metastatic sites *	1	1	0	3	0	0	2	0	0	* similar biology of primary & metastatic sites *	3	0	0	3	1	0
* genetic *	3	1	0	* genetic *	2	0	0	0	1	0	1	0	0	* genetic *	3	1	0	0	0	0	* genetic *	2	0	0	1	0	0	0	1	0	* genetic *	2	0	0	1	1	0
* circulation *	7	1	-2	* circulation *	4	1	0	1	0	0	2	0	2	* circulation *	5	0	2	2	1	0	* circulation *	1	0	1	3	0	1	3	1	0	* circulation *	4	1	1	3	0	1
* stickiness *	3	0	0	* stickiness *	2	0	0	1	0	0	0	0	0	* stickiness *	3	0	0	0	0	0	* stickiness *	0	0	0	3	0	0	0	0	0	* stickiness *	1	0	0	2	0	0
* microenvironment *	16	2	0	* microenvironment *	9	2	0	4	0	0	3	0	0	* microenvironment *	11	1	0	5	1	0	* microenvironment *	6	1	0	8	1	0	2	0	0	* microenvironment *	8	0	0	8	2	0
* seed and soil *	7	0	0	* seed and soil *	5	0	0	1	0	0	1	0	0	* seed and soil *	3	0	0	4	0	0	* seed and soil *	2	0	0	1	0	0	4	0	0	* seed and soil *	5	0	0	2	0	0
* chemical communication *	3	1	1	* chemical communication *	3	1	1	0	0	0	0	0	0	* chemical communication *	2	1	1	1	0	0	* chemical communication *	0	1	1	1	0	0	2	0	0	* chemical communication *	2	1	1	1	0	0
* developmental connection *	2	2	0	* developmental connection *	1	1	0	1	1	0	0	0	0	* developmental connection *	2	1	0	0	1	0	* developmental connection *	0	0	0	1	0	0	1	2	0	* developmental connection *	0	1	0	2	1	0
* selection *	2	0	0	* selection *	2	0	0	0	0	0	0	0	0	* selection *	2	0	0	0	0	0	* selection *	1	0	0	1	0	0	0	0	0	* selection *	2	0	0	0	0	0
* blood supply *	2	0	0	* blood supply *	1	0	0	0	0	0	1	0	0	* blood supply *	2	0	0	0	0	0	* blood supply *	0	0	0	1	0	0	1	0	0	* blood supply *	1	0	0	1	0	0
* other factors/reasons*	3	3	0	* other factors/reasons*	2	2	0	0	0	0	1	1	0	* other factors/reasons*	3	1	0	0	2	0	* other factors/reasons*	1	0	0	1	1	0	1	2	0	* other factors/reasons*	2	0	0	1	3	0

## Sheet: evolution_all
idea	A_all	M_all	D_all	idea	A_phd	M_phd	D_phd	A_md	M_md	D_md	A_mdphd	M_mdphd	D_mdphd	idea	A_men	M_men	D_men	A_women	M_women	D_women	idea	A_upto86	M_upto86	D_upto86	A_from86to95	M_from86to95	D_from86to95	A_after95	M_after95	D_after95	idea	A_phone	M_phone	D_phone	A_inperson	M_inperson	D_inperson
* general comments *	17	0	1	* general comments *	7	0	1	6	0	0	4	0	0	* general comments *	11	0	0	6	0	1	* general comments *	6	0	0	8	0	0	3	0	1	* general comments *	7	0	0	10	0	1
I don't think of evolution	3	0	0	I don't think of evolution	0	0	0	3	0	0	0	0	0	I don't think of evolution	2	0	0	1	0	0	I don't think of evolution	0	0	0	2	0	0	1	0	0	I don't think of evolution	0	0	0	3	0	0
I don't know about evolution / cannot comment	2	0	0	I don't know about evolution / cannot comment	0	0	0	1	0	0	1	0	0	I don't know about evolution / cannot comment	2	0	0	0	0	0	I don't know about evolution / cannot comment	1	0	0	1	0	0	0	0	0	I don't know about evolution / cannot comment	1	0	0	1	0	0
don't know if there is evolutionary survival advantage	1	0	0	don't know if there is evolutionary survival advantage	0	0	0	0	0	0	1	0	0	don't know if there is evolutionary survival advantage	1	0	0	0	0	0	don't know if there is evolutionary survival advantage	0	0	0	0	0	0	1	0	0	don't know if there is evolutionary survival advantage	0	0	0	1	0	0
I can see similarities between evolution and metastasis / there is connection/ they are related	6	0	1	I can see similarities between evolution and metastasis / there is connection/ they are related	5	0	1	1	0	0	0	0	0	I can see similarities between evolution and metastasis / there is connection/ they are related	3	0	0	3	0	1	I can see similarities between evolution and metastasis / there is connection/ they are related	4	0	0	2	0	0	0	0	1	I can see similarities between evolution and metastasis / there is connection/ they are related	3	0	0	3	0	1
important connection between evolution and metastasis for some aspects of metastasis	2	0	0	important connection between evolution and metastasis for some aspects of metastasis	0	0	0	0	0	0	2	0	0	important connection between evolution and metastasis for some aspects of metastasis	1	0	0	1	0	0	important connection between evolution and metastasis for some aspects of metastasis	0	0	0	2	0	0	0	0	0	important connection between evolution and metastasis for some aspects of metastasis	1	0	0	1	0	0
I don't know what the similarities are	1	0	0	I don't know what the similarities are	1	0	0	0	0	0	0	0	0	I don't know what the similarities are	0	0	0	1	0	0	I don't know what the similarities are	0	0	0	1	0	0	0	0	0	I don't know what the similarities are	0	0	0	1	0	0
I don't know how all correlates, open to debate	1	0	0	I don't know how all correlates, open to debate	1	0	0	0	0	0	0	0	0	I don't know how all correlates, open to debate	1	0	0	0	0	0	I don't know how all correlates, open to debate	0	0	0	1	0	0	0	0	0	I don't know how all correlates, open to debate	1	0	0	0	0	0
don't know much about evolution but a connection sounds interesting	2	0	0	don't know much about evolution but a connection sounds interesting	1	0	0	0	0	0	1	0	0	don't know much about evolution but a connection sounds interesting	0	0	0	2	0	0	don't know much about evolution but a connection sounds interesting	0	0	0	2	0	0	0	0	0	don't know much about evolution but a connection sounds interesting	1	0	0	1	0	0
connection has been around/speculated for about 20 years	1	0	0	connection has been around/speculated for about 20 years	1	0	0	0	0	0	0	0	0	connection has been around/speculated for about 20 years	0	0	0	1	0	0	connection has been around/speculated for about 20 years	0	0	0	1	0	0	0	0	0	connection has been around/speculated for about 20 years	0	0	0	1	0	0
evolution can teach us about metastasis, help us understand	2	0	0	evolution can teach us about metastasis, help us understand	2	0	0	0	0	0	0	0	0	evolution can teach us about metastasis, help us understand	1	0	0	1	0	0	evolution can teach us about metastasis, help us understand	1	0	0	1	0	0	0	0	0	evolution can teach us about metastasis, help us understand	0	0	0	2	0	0
understanding the connection and evolutionary principles would be helpful/important	2	0	0	understanding the connection and evolutionary principles would be helpful/important	2	0	0	0	0	0	0	0	0	understanding the connection and evolutionary principles would be helpful/important	1	0	0	1	0	0	understanding the connection and evolutionary principles would be helpful/important	0	0	0	1	0	0	1	0	0	understanding the connection and evolutionary principles would be helpful/important	2	0	0	0	0	0
connection between metastasis and evolution is interesting	1	0	0	connection between metastasis and evolution is interesting	0	0	0	1	0	0	0	0	0	connection between metastasis and evolution is interesting	1	0	0	0	0	0	connection between metastasis and evolution is interesting	1	0	0	0	0	0	0	0	0	connection between metastasis and evolution is interesting	0	0	0	1	0	0
evolution is based on reproduction, metastasis on cell division	1	0	0	evolution is based on reproduction, metastasis on cell division	0	0	0	0	0	0	1	0	0	evolution is based on reproduction, metastasis on cell division	1	0	0	0	0	0	evolution is based on reproduction, metastasis on cell division	0	0	0	0	0	0	1	0	0	evolution is based on reproduction, metastasis on cell division	0	0	0	1	0	0
best definition for metastasis-related evolution: microevolution	1	0	0	best definition for metastasis-related evolution: microevolution	1	0	0	0	0	0	0	0	0	best definition for metastasis-related evolution: microevolution	1	0	0	0	0	0	best definition for metastasis-related evolution: microevolution	1	0	0	0	0	0	0	0	0	best definition for metastasis-related evolution: microevolution	0	0	0	1	0	0
* natural selection *	15	0	4	* natural selection *	9	0	2	3	0	1	3	0	1	* natural selection *	10	0	3	5	0	1	* natural selection *	5	0	0	6	0	1	4	0	3	* natural selection *	8	0	1	7	0	3
metastasis is a Darwinian process	2	0	3	metastasis is a Darwinian process	1	0	1	0	0	1	1	0	1	metastasis is a Darwinian process	2	0	3	0	0	0	metastasis is a Darwinian process	1	0	0	1	0	1	0	0	2	metastasis is a Darwinian process	1	0	1	1	0	2
tumor (progression) adopts to selective processes - there is selection - have evolutionary processes	7	0	0	tumor (progression) adopts to selective processes - there is selection - have evolutionary processes	5	0	0	0	0	0	2	0	0	tumor (progression) adopts to selective processes - there is selection - have evolutionary processes	3	0	0	4	0	0	tumor (progression) adopts to selective processes - there is selection - have evolutionary processes	2	0	0	3	0	0	2	0	0	tumor (progression) adopts to selective processes - there is selection - have evolutionary processes	4	0	0	3	0	0
survival of the fittest within cancer cells, natural selection, they servive hostile environment	6	0	0	survival of the fittest within cancer cells, natural selection, they servive hostile environment	3	0	0	2	0	0	1	0	0	survival of the fittest within cancer cells, natural selection, they servive hostile environment	4	0	0	2	0	0	survival of the fittest within cancer cells, natural selection, they servive hostile environment	3	0	0	1	0	0	2	0	0	survival of the fittest within cancer cells, natural selection, they servive hostile environment	3	0	0	3	0	0
some metastasis processes are adapted from evolutionary processes	0	0	1	some metastasis processes are adapted from evolutionary processes	0	0	1	0	0	0	0	0	0	some metastasis processes are adapted from evolutionary processes	0	0	0	0	0	1	some metastasis processes are adapted from evolutionary processes	0	0	0	0	0	0	0	0	1	some metastasis processes are adapted from evolutionary processes	0	0	0	0	0	1
selection at somatic, mutational, and epigenetic level	1	0	0	selection at somatic, mutational, and epigenetic level	1	0	0	0	0	0	0	0	0	selection at somatic, mutational, and epigenetic level	1	0	0	0	0	0	selection at somatic, mutational, and epigenetic level	0	0	0	1	0	0	0	0	0	selection at somatic, mutational, and epigenetic level	1	0	0	0	0	0
there is selective angiogenic advantage	2	0	0	there is selective angiogenic advantage	1	0	0	0	0	0	1	0	0	there is selective angiogenic advantage	2	0	0	0	0	0	there is selective angiogenic advantage	1	0	0	1	0	0	0	0	0	there is selective angiogenic advantage	2	0	0	0	0	0
there is connection between genetic predispositon and selection, our lifestyle changes and our genes adapt	1	0	0	there is connection between genetic predispositon and selection, our lifestyle changes and our genes adapt	0	0	0	1	0	0	0	0	0	there is connection between genetic predispositon and selection, our lifestyle changes and our genes adapt	0	0	0	1	0	0	there is connection between genetic predispositon and selection, our lifestyle changes and our genes adapt	1	0	0	0	0	0	0	0	0	there is connection between genetic predispositon and selection, our lifestyle changes and our genes adapt	0	0	0	1	0	0
there is clonal selection and expansion	1	0	0	there is clonal selection and expansion	1	0	0	0	0	0	0	0	0	there is clonal selection and expansion	1	0	0	0	0	0	there is clonal selection and expansion	0	0	0	0	0	0	1	0	0	there is clonal selection and expansion	1	0	0	0	0	0
(all primary) tumors acquire mutations- selection for the ones adapted to the environment	1	0	0	(all primary) tumors acquire mutations- selection for the ones adapted to the environment	1	0	0	0	0	0	0	0	0	(all primary) tumors acquire mutations- selection for the ones adapted to the environment	0	0	0	1	0	0	(all primary) tumors acquire mutations- selection for the ones adapted to the environment	0	0	0	1	0	0	0	0	0	(all primary) tumors acquire mutations- selection for the ones adapted to the environment	0	0	0	1	0	0
metastatic tumors have to select for a new site and fot growth at site	2	0	0	metastatic tumors have to select for a new site and fot growth at site	2	0	0	0	0	0	0	0	0	metastatic tumors have to select for a new site and fot growth at site	1	0	0	1	0	0	metastatic tumors have to select for a new site and fot growth at site	0	0	0	2	0	0	0	0	0	metastatic tumors have to select for a new site and fot growth at site	1	0	0	1	0	0
successful metastatic cells are the strongest, fittest - (survival) selection for metastasis	2	0	0	successful metastatic cells are the strongest, fittest - (survival) selection for metastasis	1	0	0	1	0	0	0	0	0	successful metastatic cells are the strongest, fittest - (survival) selection for metastasis	2	0	0	0	0	0	successful metastatic cells are the strongest, fittest - (survival) selection for metastasis	0	0	0	1	0	0	1	0	0	successful metastatic cells are the strongest, fittest - (survival) selection for metastasis	1	0	0	1	0	0
the hosts (individuals) also adopt to evolutionary pressure	1	0	0	the hosts (individuals) also adopt to evolutionary pressure	0	0	0	1	0	0	0	0	0	the hosts (individuals) also adopt to evolutionary pressure	0	0	0	1	0	0	the hosts (individuals) also adopt to evolutionary pressure	1	0	0	0	0	0	0	0	0	the hosts (individuals) also adopt to evolutionary pressure	0	0	0	1	0	0
* other evolutionary connections *	5	2	0	* other evolutionary connections *	2	2	0	2	0	0	1	0	0	* other evolutionary connections *	3	2	0	2	0	0	* other evolutionary connections *	1	1	0	3	1	0	1	0	0	* other evolutionary connections *	2	1	0	3	1	0
due to evolution and increased complexity we have diverse tumors	0	1	0	due to evolution and increased complexity we have diverse tumors	0	1	0	0	0	0	0	0	0	due to evolution and increased complexity we have diverse tumors	0	1	0	0	0	0	due to evolution and increased complexity we have diverse tumors	0	0	0	0	1	0	0	0	0	due to evolution and increased complexity we have diverse tumors	0	1	0	0	0	0
as evolution happens, as animals and humans evolve then the complexity of things going wrong becomes greater	1	0	0	as evolution happens, as animals and humans evolve then the complexity of things going wrong becomes greater	1	0	0	0	0	0	0	0	0	as evolution happens, as animals and humans evolve then the complexity of things going wrong becomes greater	1	0	0	0	0	0	as evolution happens, as animals and humans evolve then the complexity of things going wrong becomes greater	0	0	0	1	0	0	0	0	0	as evolution happens, as animals and humans evolve then the complexity of things going wrong becomes greater	1	0	0	0	0	0
some things concerved through evolution, eg, communication	0	1	0	some things concerved through evolution, eg, communication	0	1	0	0	0	0	0	0	0	some things concerved through evolution, eg, communication	0	1	0	0	0	0	some things concerved through evolution, eg, communication	0	1	0	0	0	0	0	0	0	some things concerved through evolution, eg, communication	0	0	0	0	1	0
evolutionary genes of movement involved in head development - metastasis is about movement	2	0	0	evolutionary genes of movement involved in head development - metastasis is about movement	0	0	0	2	0	0	0	0	0	evolutionary genes of movement involved in head development - metastasis is about movement	2	0	0	0	0	0	evolutionary genes of movement involved in head development - metastasis is about movement	1	0	0	0	0	0	1	0	0	evolutionary genes of movement involved in head development - metastasis is about movement	0	0	0	2	0	0
twist, snail… involved in head development, and evolutionary conserved, now in metastasis	1	0	0	twist, snail… involved in head development, and evolutionary conserved, now in metastasis	0	0	0	1	0	0	0	0	0	twist, snail… involved in head development, and evolutionary conserved, now in metastasis	1	0	0	0	0	0	twist, snail… involved in head development, and evolutionary conserved, now in metastasis	1	0	0	0	0	0	0	0	0	twist, snail… involved in head development, and evolutionary conserved, now in metastasis	0	0	0	1	0	0
evolutionary events within the tumor will determine development, growth, and success of the tumor	1	0	0	evolutionary events within the tumor will determine development, growth, and success of the tumor	0	0	0	0	0	0	1	0	0	evolutionary events within the tumor will determine development, growth, and success of the tumor	0	0	0	1	0	0	evolutionary events within the tumor will determine development, growth, and success of the tumor	0	0	0	1	0	0	0	0	0	evolutionary events within the tumor will determine development, growth, and success of the tumor	1	0	0	0	0	0
a tumor evolves inside the animal	1	0	0	a tumor evolves inside the animal	1	0	0	0	0	0	0	0	0	a tumor evolves inside the animal	0	0	0	1	0	0	a tumor evolves inside the animal	0	0	0	1	0	0	0	0	0	a tumor evolves inside the animal	0	0	0	1	0	0
* treatment *	3	0	0	* treatment *	2	0	0	0	0	0	1	0	0	* treatment *	3	0	0	0	0	0	* treatment *	1	0	0	1	0	0	1	0	0	* treatment *	2	0	0	1	0	0
when you use chemo you are selecting for certain cells	1	0	0	when you use chemo you are selecting for certain cells	0	0	0	0	0	0	1	0	0	when you use chemo you are selecting for certain cells	1	0	0	0	0	0	when you use chemo you are selecting for certain cells	0	0	0	0	0	0	1	0	0	when you use chemo you are selecting for certain cells	0	0	0	1	0	0
that's why treatment is difficult, cells learn how to survive, dominate (drug resistance)	2	0	0	that's why treatment is difficult, cells learn how to survive, dominate (drug resistance)	2	0	0	0	0	0	0	0	0	that's why treatment is difficult, cells learn how to survive, dominate (drug resistance)	2	0	0	0	0	0	that's why treatment is difficult, cells learn how to survive, dominate (drug resistance)	1	0	0	1	0	0	0	0	0	that's why treatment is difficult, cells learn how to survive, dominate (drug resistance)	2	0	0	0	0	0

## Sheet: evolution_main-groups
idea	A_all	M_all	D_all	idea	A_phd	M_phd	D_phd	A_md	M_md	D_md	A_mdphd	M_mdphd	D_mdphd	idea	A_men	M_men	D_men	A_women	M_women	D_women	idea	A_upto86	M_upto86	D_upto86	A_from86to95	M_from86to95	D_from86to95	A_after95	M_after95	D_after95	idea	A_phone	M_phone	D_phone	A_inperson	M_inperson	D_inperson
* general comments *	17	0	1	* general comments *	7	0	1	6	0	0	4	0	0	* general comments *	11	0	0	6	0	1	* general comments *	6	0	0	8	0	0	3	0	1	* general comments *	7	0	0	10	0	1
I don't think of evolution	3	0	0	I don't think of evolution	0	0	0	3	0	0	0	0	0	I don't think of evolution	2	0	0	1	0	0	I don't think of evolution	0	0	0	2	0	0	1	0	0	I don't think of evolution	0	0	0	3	0	0
I don't know about evolution / cannot comment	2	0	0	I don't know about evolution / cannot comment	0	0	0	1	0	0	1	0	0	I don't know about evolution / cannot comment	2	0	0	0	0	0	I don't know about evolution / cannot comment	1	0	0	1	0	0	0	0	0	I don't know about evolution / cannot comment	1	0	0	1	0	0
don't know if there is evolutionary survival advantage	1	0	0	don't know if there is evolutionary survival advantage	0	0	0	0	0	0	1	0	0	don't know if there is evolutionary survival advantage	1	0	0	0	0	0	don't know if there is evolutionary survival advantage	0	0	0	0	0	0	1	0	0	don't know if there is evolutionary survival advantage	0	0	0	1	0	0
I can see similarities between evolution and metastasis / there is connection/ they are related	6	0	1	I can see similarities between evolution and metastasis / there is connection/ they are related	5	0	1	1	0	0	0	0	0	I can see similarities between evolution and metastasis / there is connection/ they are related	3	0	0	3	0	1	I can see similarities between evolution and metastasis / there is connection/ they are related	4	0	0	2	0	0	0	0	1	I can see similarities between evolution and metastasis / there is connection/ they are related	3	0	0	3	0	1
important connection between evolution and metastasis for some aspects of metastasis	2	0	0	important connection between evolution and metastasis for some aspects of metastasis	0	0	0	0	0	0	2	0	0	important connection between evolution and metastasis for some aspects of metastasis	1	0	0	1	0	0	important connection between evolution and metastasis for some aspects of metastasis	0	0	0	2	0	0	0	0	0	important connection between evolution and metastasis for some aspects of metastasis	1	0	0	1	0	0
I don't know what the similarities are	1	0	0	I don't know what the similarities are	1	0	0	0	0	0	0	0	0	I don't know what the similarities are	0	0	0	1	0	0	I don't know what the similarities are	0	0	0	1	0	0	0	0	0	I don't know what the similarities are	0	0	0	1	0	0
I don't know how all correlates, open to debate	1	0	0	I don't know how all correlates, open to debate	1	0	0	0	0	0	0	0	0	I don't know how all correlates, open to debate	1	0	0	0	0	0	I don't know how all correlates, open to debate	0	0	0	1	0	0	0	0	0	I don't know how all correlates, open to debate	1	0	0	0	0	0
don't know much about evolution but a connection sounds interesting	2	0	0	don't know much about evolution but a connection sounds interesting	1	0	0	0	0	0	1	0	0	don't know much about evolution but a connection sounds interesting	0	0	0	2	0	0	don't know much about evolution but a connection sounds interesting	0	0	0	2	0	0	0	0	0	don't know much about evolution but a connection sounds interesting	1	0	0	1	0	0
connection has been around/speculated for about 20 years	1	0	0	connection has been around/speculated for about 20 years	1	0	0	0	0	0	0	0	0	connection has been around/speculated for about 20 years	0	0	0	1	0	0	connection has been around/speculated for about 20 years	0	0	0	1	0	0	0	0	0	connection has been around/speculated for about 20 years	0	0	0	1	0	0
evolution can teach us about metastasis, help us understand	2	0	0	evolution can teach us about metastasis, help us understand	2	0	0	0	0	0	0	0	0	evolution can teach us about metastasis, help us understand	1	0	0	1	0	0	evolution can teach us about metastasis, help us understand	1	0	0	1	0	0	0	0	0	evolution can teach us about metastasis, help us understand	0	0	0	2	0	0
understanding the connection and evolutionary principles would be helpful/important	2	0	0	understanding the connection and evolutionary principles would be helpful/important	2	0	0	0	0	0	0	0	0	understanding the connection and evolutionary principles would be helpful/important	1	0	0	1	0	0	understanding the connection and evolutionary principles would be helpful/important	0	0	0	1	0	0	1	0	0	understanding the connection and evolutionary principles would be helpful/important	2	0	0	0	0	0
connection between metastasis and evolution is interesting	1	0	0	connection between metastasis and evolution is interesting	0	0	0	1	0	0	0	0	0	connection between metastasis and evolution is interesting	1	0	0	0	0	0	connection between metastasis and evolution is interesting	1	0	0	0	0	0	0	0	0	connection between metastasis and evolution is interesting	0	0	0	1	0	0
evolution is based on reproduction, metastasis on cell division	1	0	0	evolution is based on reproduction, metastasis on cell division	0	0	0	0	0	0	1	0	0	evolution is based on reproduction, metastasis on cell division	1	0	0	0	0	0	evolution is based on reproduction, metastasis on cell division	0	0	0	0	0	0	1	0	0	evolution is based on reproduction, metastasis on cell division	0	0	0	1	0	0
best definition for metastasis-related evolution: microevolution	1	0	0	best definition for metastasis-related evolution: microevolution	1	0	0	0	0	0	0	0	0	best definition for metastasis-related evolution: microevolution	1	0	0	0	0	0	best definition for metastasis-related evolution: microevolution	1	0	0	0	0	0	0	0	0	best definition for metastasis-related evolution: microevolution	0	0	0	1	0	0
* natural selection *	15	0	-4	* natural selection *	9	0	2	3	0	1	3	0	1	* natural selection *	10	0	3	5	0	1	* natural selection *	5	0	0	6	0	1	4	0	3	* natural selection *	8	0	1	7	0	3
* other evolutionary connections *	5	2	0	* other evolutionary connections *	2	2	0	2	0	0	1	0	0	* other evolutionary connections *	3	2	0	2	0	0	* other evolutionary connections *	1	1	0	3	1	0	1	0	0	* other evolutionary connections *	2	1	0	3	1	0
* treatment *	3	0	0	* treatment *	2	0	0	0	0	0	1	0	0	* treatment *	3	0	0	0	0	0	* treatment *	1	0	0	1	0	0	1	0	0	* treatment *	2	0	0	1	0	0

## Sheet: development_all
idea	A_all	M_all	D_all	idea	A_phd	M_phd	D_phd	A_md	M_md	D_md	A_mdphd	M_mdphd	D_mdphd	idea	A_men	M_men	D_men	A_women	M_women	D_women	idea	A_upto86	M_upto86	D_upto86	A_from86to95	M_from86to95	D_from86to95	A_after95	M_after95	D_after95	idea	A_phone	M_phone	D_phone	A_inperson	M_inperson	D_inperson
GENERIC COMMENTS - ON CONNECTION & IMPORTANCE	0	0	0	GENERIC COMMENTS - ON CONNECTION & IMPORTANCE	0	0	0	0	0	0	0	0	0	GENERIC COMMENTS - ON CONNECTION & IMPORTANCE	0	0	0	0	0	0	GENERIC COMMENTS - ON CONNECTION & IMPORTANCE	0	0	0	0	0	0	0	0	0	GENERIC COMMENTS - ON CONNECTION & IMPORTANCE	0	0	0	0	0	0
don't know much on this topic	2	0	0	don't know much on this topic	2	0	0	0	0	0	0	0	0	don't know much on this topic	1	0	0	1	0	0	don't know much on this topic	1	0	0	1	0	0	0	0	0	don't know much on this topic	0	0	0	2	0	0
have not worked on this	1	0	0	have not worked on this	0	0	0	1	0	0	0	0	0	have not worked on this	1	0	0	0	0	0	have not worked on this	0	0	0	0	0	0	1	0	0	have not worked on this	0	0	0	1	0	0
this is an old connection ~20 years	1	0	0	this is an old connection ~20 years	1	0	0	0	0	0	0	0	0	this is an old connection ~20 years	0	0	0	1	0	0	this is an old connection ~20 years	0	0	0	1	0	0	0	0	0	this is an old connection ~20 years	0	0	0	1	0	0
don't know how (sub)programs, found in normal ceels too, are coordinated in cancer cells	1	0	0	don't know how (sub)programs, found in normal ceels too, are coordinated in cancer cells	1	0	0	0	0	0	0	0	0	don't know how (sub)programs, found in normal ceels too, are coordinated in cancer cells	1	0	0	0	0	0	don't know how (sub)programs, found in normal ceels too, are coordinated in cancer cells	0	0	0	0	0	0	1	0	0	don't know how (sub)programs, found in normal ceels too, are coordinated in cancer cells	1	0	0	0	0	0
(sub)programs are coordinated in cancer cells by repressing other programs	0	1	0	(sub)programs are coordinated in cancer cells by repressing other programs	0	1	0	0	0	0	0	0	0	(sub)programs are coordinated in cancer cells by repressing other programs	0	1	0	0	0	0	(sub)programs are coordinated in cancer cells by repressing other programs	0	0	0	0	0	0	0	1	0	(sub)programs are coordinated in cancer cells by repressing other programs	0	1	0	0	0	0
* there is connection between development and metastasis *	10	1	1	* there is connection between development and metastasis *	7	0	0	1	1	1	2	0	0	* there is connection between development and metastasis *	6	1	1	4	0	0	* there is connection between development and metastasis *	6	0	0	2	1	0	2	0	1	* there is connection between development and metastasis *	8	0	0	2	1	1
there is connection between development and metastasis	10	0	1	there is connection between development and metastasis	7	0	0	1	0	1	2	0	0	there is connection between development and metastasis	6	0	1	4	0	0	there is connection between development and metastasis	6	0	0	2	0	0	2	0	1	there is connection between development and metastasis	8	0	0	2	0	1
will not be surprised if they are similar --> M	1	0	0	will not be surprised if they are similar --> M	0	0	0	1	0	0	0	0	0	will not be surprised if they are similar --> M	1	0	0	0	0	0	will not be surprised if they are similar --> M	0	0	0	1	0	0	0	0	0	will not be surprised if they are similar --> M	0	0	0	1	0	0
* important to understand the connection of development and metastasis *	7	0	0	* important to understand the connection of development and metastasis *	4	0	0	2	0	0	1	0	0	* important to understand the connection of development and metastasis *	4	0	0	3	0	0	* important to understand the connection of development and metastasis *	2	0	0	4	0	0	1	0	0	* important to understand the connection of development and metastasis *	4	0	0	3	0	0
understanding (some aspects of) development can teach us about metastasis	6	0	0	understanding (some aspects of) development can teach us about metastasis	4	0	0	1	0	0	1	0	0	understanding (some aspects of) development can teach us about metastasis	4	0	0	2	0	0	understanding (some aspects of) development can teach us about metastasis	1	0	0	4	0	0	1	0	0	understanding (some aspects of) development can teach us about metastasis	4	0	0	2	0	0
important to understand the developmental pathways	1	0	0	important to understand the developmental pathways	0	0	0	1	0	0	0	0	0	important to understand the developmental pathways	0	0	0	1	0	0	important to understand the developmental pathways	1	0	0	0	0	0	0	0	0	important to understand the developmental pathways	0	0	0	1	0	0
mechanisms that cause switch of genes from silenced to hyeractive, and vice versa, are important for a number of tumors	1	0	0	mechanisms that cause switch of genes from silenced to hyeractive, and vice versa, are important for a number of tumors	0	0	0	1	0	0	0	0	0	mechanisms that cause switch of genes from silenced to hyeractive, and vice versa, are important for a number of tumors	0	0	0	1	0	0	mechanisms that cause switch of genes from silenced to hyeractive, and vice versa, are important for a number of tumors	1	0	0	0	0	0	0	0	0	mechanisms that cause switch of genes from silenced to hyeractive, and vice versa, are important for a number of tumors	0	0	0	1	0	0
examples given of how understanding of development has helped in metastasis	1	0	0	examples given of how understanding of development has helped in metastasis	1	0	0	0	0	0	0	0	0	examples given of how understanding of development has helped in metastasis	1	0	0	0	0	0	examples given of how understanding of development has helped in metastasis	0	0	0	1	0	0	0	0	0	examples given of how understanding of development has helped in metastasis	1	0	0	0	0	0
we need to tools to test hypotheses	1	0	0	we need to tools to test hypotheses	1	0	0	0	0	0	0	0	0	we need to tools to test hypotheses	0	0	0	1	0	0	we need to tools to test hypotheses	0	0	0	1	0	0	0	0	0	we need to tools to test hypotheses	0	0	0	1	0	0
* important to understand the connection of development and cancer *	3	0	0	* important to understand the connection of development and cancer *	1	0	0	1	0	0	1	0	0	* important to understand the connection of development and cancer *	3	0	0	0	0	0	* important to understand the connection of development and cancer *	0	0	0	2	0	0	1	0	0	* important to understand the connection of development and cancer *	0	0	0	3	0	0
understanding development is very important to understand cancer biology	1	0	0	understanding development is very important to understand cancer biology	0	0	0	1	0	0	0	0	0	understanding development is very important to understand cancer biology	1	0	0	0	0	0	understanding development is very important to understand cancer biology	0	0	0	1	0	0	0	0	0	understanding development is very important to understand cancer biology	0	0	0	1	0	0
understanding the normal roles/functions in development of the genes related to cancer susceptibility will help us understand cancer	1	0	0	understanding the normal roles/functions in development of the genes related to cancer susceptibility will help us understand cancer	0	0	0	1	0	0	0	0	0	understanding the normal roles/functions in development of the genes related to cancer susceptibility will help us understand cancer	1	0	0	0	0	0	understanding the normal roles/functions in development of the genes related to cancer susceptibility will help us understand cancer	0	0	0	1	0	0	0	0	0	understanding the normal roles/functions in development of the genes related to cancer susceptibility will help us understand cancer	0	0	0	1	0	0
the reason we don't know how to cure embryonic cancer is because we don't understand embryonic development	1	0	0	the reason we don't know how to cure embryonic cancer is because we don't understand embryonic development	1	0	0	0	0	0	0	0	0	the reason we don't know how to cure embryonic cancer is because we don't understand embryonic development	1	0	0	0	0	0	the reason we don't know how to cure embryonic cancer is because we don't understand embryonic development	0	0	0	1	0	0	0	0	0	the reason we don't know how to cure embryonic cancer is because we don't understand embryonic development	0	0	0	1	0	0
important to look at developing tissue to study cancer	1	0	0	important to look at developing tissue to study cancer	0	0	0	0	0	0	1	0	0	important to look at developing tissue to study cancer	1	0	0	0	0	0	important to look at developing tissue to study cancer	0	0	0	0	0	0	1	0	0	important to look at developing tissue to study cancer	0	0	0	1	0	0
* cells use existing processes/mechanisms *	8	1	0	* cells use existing processes/mechanisms *	6	0	0	1	0	0	1	1	0	* cells use existing processes/mechanisms *	6	1	0	2	0	0	* cells use existing processes/mechanisms *	4	0	0	1	0	0	3	1	0	* cells use existing processes/mechanisms *	5	0	0	3	1	0
makes sense that the cancer cell is using what is already available, highjacks a (primitive)program once existed to create it own	3	1	0	makes sense that the cancer cell is using what is already available, highjacks a (primitive)program once existed to create it own	2	0	0	0	0	0	1	1	0	makes sense that the cancer cell is using what is already available, highjacks a (primitive)program once existed to create it own	2	1	0	1	0	0	makes sense that the cancer cell is using what is already available, highjacks a (primitive)program once existed to create it own	2	0	0	0	0	0	1	1	0	makes sense that the cancer cell is using what is already available, highjacks a (primitive)program once existed to create it own	3	0	0	0	1	0
either activating embryonic processes in metastasis or processes present in other cell types	1	0	0	either activating embryonic processes in metastasis or processes present in other cell types	1	0	0	0	0	0	0	0	0	either activating embryonic processes in metastasis or processes present in other cell types	1	0	0	0	0	0	either activating embryonic processes in metastasis or processes present in other cell types	0	0	0	1	0	0	0	0	0	either activating embryonic processes in metastasis or processes present in other cell types	1	0	0	0	0	0
metastasis also similar to other processes (wound healing, bacterial communities, neurocrest…)	4	0	0	metastasis also similar to other processes (wound healing, bacterial communities, neurocrest…)	3	0	0	1	0	0	0	0	0	metastasis also similar to other processes (wound healing, bacterial communities, neurocrest…)	2	0	0	2	0	0	metastasis also similar to other processes (wound healing, bacterial communities, neurocrest…)	2	0	0	0	0	0	2	0	0	metastasis also similar to other processes (wound healing, bacterial communities, neurocrest…)	1	0	0	3	0	0
to be metastatic need properties independent by themselves, that even normal cells have	1	0	0	to be metastatic need properties independent by themselves, that even normal cells have	1	0	0	0	0	0	0	0	0	to be metastatic need properties independent by themselves, that even normal cells have	1	0	0	0	0	0	to be metastatic need properties independent by themselves, that even normal cells have	0	0	0	0	0	0	1	0	0	to be metastatic need properties independent by themselves, that even normal cells have	1	0	0	0	0	0
tumors do whatever they have to to be efficient	1	0	0	tumors do whatever they have to to be efficient	1	0	0	0	0	0	0	0	0	tumors do whatever they have to to be efficient	0	0	0	1	0	0	tumors do whatever they have to to be efficient	0	0	0	0	0	0	1	0	0	tumors do whatever they have to to be efficient	0	0	0	1	0	0
* connection with cancer *	3	0	1	* connection with cancer *	0	0	0	0	0	1	3	0	0	* connection with cancer *	3	0	1	0	0	0	* connection with cancer *	1	0	0	0	0	0	2	0	1	* connection with cancer *	1	0	0	2	0	1
tumors are models of some aspect of embryonic development	1	0	0	tumors are models of some aspect of embryonic development	0	0	0	0	0	0	1	0	0	tumors are models of some aspect of embryonic development	1	0	0	0	0	0	tumors are models of some aspect of embryonic development	1	0	0	0	0	0	0	0	0	tumors are models of some aspect of embryonic development	1	0	0	0	0	0
there is connection with cancer but not sure how it extends to metastasis	1	0	0	there is connection with cancer but not sure how it extends to metastasis	0	0	0	0	0	0	1	0	0	there is connection with cancer but not sure how it extends to metastasis	1	0	0	0	0	0	there is connection with cancer but not sure how it extends to metastasis	0	0	0	0	0	0	1	0	0	there is connection with cancer but not sure how it extends to metastasis	0	0	0	1	0	0
this connection is related to stem-cell hypothesis for cancer	1	0	0	this connection is related to stem-cell hypothesis for cancer	0	0	0	0	0	0	1	0	0	this connection is related to stem-cell hypothesis for cancer	1	0	0	0	0	0	this connection is related to stem-cell hypothesis for cancer	0	0	0	0	0	0	1	0	0	this connection is related to stem-cell hypothesis for cancer	0	0	0	1	0	0
cancer stem cells are very different to embryonic cells --> D	1	0	0	cancer stem cells are very different to embryonic cells --> D	0	0	0	1	0	0	0	0	0	cancer stem cells are very different to embryonic cells --> D	1	0	0	0	0	0	cancer stem cells are very different to embryonic cells --> D	0	0	0	0	0	0	1	0	0	cancer stem cells are very different to embryonic cells --> D	0	0	0	1	0	0
embryonic cells are more related to adult normal stem cells --> D	1	0	0	embryonic cells are more related to adult normal stem cells --> D	0	0	0	1	0	0	0	0	0	embryonic cells are more related to adult normal stem cells --> D	1	0	0	0	0	0	embryonic cells are more related to adult normal stem cells --> D	0	0	0	0	0	0	1	0	0	embryonic cells are more related to adult normal stem cells --> D	0	0	0	1	0	0
different stem cells for metastasis "metastatic stem cells" --> D	0	1	0	different stem cells for metastasis "metastatic stem cells" --> D	0	0	0	0	1	0	0	0	0	different stem cells for metastasis "metastatic stem cells" --> D	0	1	0	0	0	0	different stem cells for metastasis "metastatic stem cells" --> D	0	0	0	0	0	0	0	1	0	different stem cells for metastasis "metastatic stem cells" --> D	0	0	0	0	1	0
SIMILARITIES BETWEEN DEVELOPMENT & METASTASIS (AND/OR CANCER IN GENERAL)	22	2	0	SIMILARITIES BETWEEN DEVELOPMENT & METASTASIS (AND/OR CANCER IN GENERAL)	11	1	0	5	1	0	6	0	0	SIMILARITIES BETWEEN DEVELOPMENT & METASTASIS (AND/OR CANCER IN GENERAL)	15	2	0	7	0	0	SIMILARITIES BETWEEN DEVELOPMENT & METASTASIS (AND/OR CANCER IN GENERAL)	7	1	0	10	1	0	5	0	0	SIMILARITIES BETWEEN DEVELOPMENT & METASTASIS (AND/OR CANCER IN GENERAL)	11	0	0	11	2	0
* similarities with development *	15	1	0	* similarities with development *	7	0	0	3	1	0	5	0	0	* similarities with development *	12	1	0	3	0	0	* similarities with development *	4	0	0	8	1	0	3	0	0	* similarities with development *	7	0	0	8	1	0
some development mechanisms are similar/same in metastasis	9	0	0	some development mechanisms are similar/same in metastasis	4	0	0	3	0	0	2	0	0	some development mechanisms are similar/same in metastasis	8	0	0	1	0	0	some development mechanisms are similar/same in metastasis	0	0	0	7	0	0	2	0	0	some development mechanisms are similar/same in metastasis	2	0	0	7	0	0
examples given of known genes/proteins/signals/players that exist in both development and metastasis	9	0	0	examples given of known genes/proteins/signals/players that exist in both development and metastasis	6	0	0	0	0	0	3	0	0	examples given of known genes/proteins/signals/players that exist in both development and metastasis	6	0	0	3	0	0	examples given of known genes/proteins/signals/players that exist in both development and metastasis	3	0	0	4	0	0	2	0	0	examples given of known genes/proteins/signals/players that exist in both development and metastasis	5	0	0	4	0	0
examples given of known mechanisms/pathways that exist in both development and metastasis (eg: EMT, methylation, migration…)	6	0	0	examples given of known mechanisms/pathways that exist in both development and metastasis (eg: EMT, methylation, migration…)	3	0	0	1	0	0	2	0	0	examples given of known mechanisms/pathways that exist in both development and metastasis (eg: EMT, methylation, migration…)	5	0	0	1	0	0	examples given of known mechanisms/pathways that exist in both development and metastasis (eg: EMT, methylation, migration…)	2	0	0	4	0	0	0	0	0	examples given of known mechanisms/pathways that exist in both development and metastasis (eg: EMT, methylation, migration…)	5	0	0	1	0	0
will not be surprised if they use identical proteins --> M	1	0	0	will not be surprised if they use identical proteins --> M	0	0	0	1	0	0	0	0	0	will not be surprised if they use identical proteins --> M	1	0	0	0	0	0	will not be surprised if they use identical proteins --> M	0	0	0	1	0	0	0	0	0	will not be surprised if they use identical proteins --> M	0	0	0	1	0	0
* similarities with cancer *	14	1	0	* similarities with cancer *	8	1	0	3	0	0	3	0	0	* similarities with cancer *	9	1	0	5	0	0	* similarities with cancer *	5	1	0	6	0	0	3	0	0	* similarities with cancer *	8	0	0	6	1	0
examples given of known connections and same genes in embryonic development and in tumors	4	0	0	examples given of known connections and same genes in embryonic development and in tumors	2	0	0	0	0	0	2	0	0	examples given of known connections and same genes in embryonic development and in tumors	3	0	0	1	0	0	examples given of known connections and same genes in embryonic development and in tumors	1	0	0	2	0	0	1	0	0	examples given of known connections and same genes in embryonic development and in tumors	2	0	0	2	0	0
there is connection with cancer - tumors use embryonic mechanisms	8	0	0	there is connection with cancer - tumors use embryonic mechanisms	5	0	0	0	0	0	3	0	0	there is connection with cancer - tumors use embryonic mechanisms	6	0	0	2	0	0	there is connection with cancer - tumors use embryonic mechanisms	2	0	0	4	0	0	2	0	0	there is connection with cancer - tumors use embryonic mechanisms	6	0	0	2	0	0
similar pathways/genes in development and tumorigeneis	7	0	0	similar pathways/genes in development and tumorigeneis	4	0	0	1	0	0	2	0	0	similar pathways/genes in development and tumorigeneis	6	0	0	1	0	0	similar pathways/genes in development and tumorigeneis	4	0	0	2	0	0	1	0	0	similar pathways/genes in development and tumorigeneis	4	0	0	3	0	0
some developmental pathways get reactivated	1	0	0	some developmental pathways get reactivated	1	0	0	0	0	0	0	0	0	some developmental pathways get reactivated	1	0	0	0	0	0	some developmental pathways get reactivated	1	0	0	0	0	0	0	0	0	some developmental pathways get reactivated	0	0	0	1	0	0
some microRNAs become reactivated	0	1	0	some microRNAs become reactivated	0	1	0	0	0	0	0	0	0	some microRNAs become reactivated	0	1	0	0	0	0	some microRNAs become reactivated	0	1	0	0	0	0	0	0	0	some microRNAs become reactivated	0	0	0	0	1	0
the differentiation is similar (esp in early stages)	5	0	0	the differentiation is similar (esp in early stages)	3	0	0	2	0	0	0	0	0	the differentiation is similar (esp in early stages)	3	0	0	2	0	0	the differentiation is similar (esp in early stages)	0	0	0	4	0	0	1	0	0	the differentiation is similar (esp in early stages)	3	0	0	2	0	0
in pediatrics you compare particular tumors to development because there are a lot of embryonic tumors, in more embryonic stem cell type	1	0	0	in pediatrics you compare particular tumors to development because there are a lot of embryonic tumors, in more embryonic stem cell type	0	0	0	1	0	0	0	0	0	in pediatrics you compare particular tumors to development because there are a lot of embryonic tumors, in more embryonic stem cell type	0	0	0	1	0	0	in pediatrics you compare particular tumors to development because there are a lot of embryonic tumors, in more embryonic stem cell type	0	0	0	1	0	0	0	0	0	in pediatrics you compare particular tumors to development because there are a lot of embryonic tumors, in more embryonic stem cell type	0	0	0	1	0	0
DIFFERENCES BETWEEN DEVELOPMENT & METASTASIS (AND/OR CANCER IN GENERAL)	12	1	0	DIFFERENCES BETWEEN DEVELOPMENT & METASTASIS (AND/OR CANCER IN GENERAL)	8	1	0	1	0	0	3	0	0	DIFFERENCES BETWEEN DEVELOPMENT & METASTASIS (AND/OR CANCER IN GENERAL)	8	0	0	4	1	0	DIFFERENCES BETWEEN DEVELOPMENT & METASTASIS (AND/OR CANCER IN GENERAL)	6	0	0	3	0	0	3	1	0	DIFFERENCES BETWEEN DEVELOPMENT & METASTASIS (AND/OR CANCER IN GENERAL)	6	0	0	6	1	0
* development is controlled, cancer is not *	10	0	0	* development is controlled, cancer is not *	8	0	0	0	0	0	2	0	0	* development is controlled, cancer is not *	7	0	0	3	0	0	* development is controlled, cancer is not *	4	0	0	3	0	0	3	0	0	* development is controlled, cancer is not *	5	0	0	5	0	0
development is well controlled/regulated/structured	5	0	0	development is well controlled/regulated/structured	5	0	0	0	0	0	0	0	0	development is well controlled/regulated/structured	3	0	0	2	0	0	development is well controlled/regulated/structured	3	0	0	2	0	0	0	0	0	development is well controlled/regulated/structured	3	0	0	2	0	0
development is controlled, metastasis in not, it goes awry	1	0	0	development is controlled, metastasis in not, it goes awry	0	0	0	0	0	0	1	0	0	development is controlled, metastasis in not, it goes awry	1	0	0	0	0	0	development is controlled, metastasis in not, it goes awry	0	0	0	0	0	0	1	0	0	development is controlled, metastasis in not, it goes awry	0	0	0	1	0	0
cancer metastasis is more chaotic	1	0	0	cancer metastasis is more chaotic	1	0	0	0	0	0	0	0	0	cancer metastasis is more chaotic	1	0	0	0	0	0	cancer metastasis is more chaotic	0	0	0	1	0	0	0	0	0	cancer metastasis is more chaotic	1	0	0	0	0	0
example of metastatic chaos given	1	0	0	example of metastatic chaos given	1	0	0	0	0	0	0	0	0	example of metastatic chaos given	1	0	0	0	0	0	example of metastatic chaos given	0	0	0	1	0	0	0	0	0	example of metastatic chaos given	1	0	0	0	0	0
hardwire is right, software is wrong	1	0	0	hardwire is right, software is wrong	1	0	0	0	0	0	0	0	0	hardwire is right, software is wrong	0	0	0	1	0	0	hardwire is right, software is wrong	0	0	0	0	0	0	1	0	0	hardwire is right, software is wrong	0	0	0	1	0	0
development is more sophisticated, developed over time	1	0	0	development is more sophisticated, developed over time	1	0	0	0	0	0	0	0	0	development is more sophisticated, developed over time	1	0	0	0	0	0	development is more sophisticated, developed over time	1	0	0	0	0	0	0	0	0	development is more sophisticated, developed over time	1	0	0	0	0	0
not just in development but in normal tissue too, you have control	1	0	0	not just in development but in normal tissue too, you have control	1	0	0	0	0	0	0	0	0	not just in development but in normal tissue too, you have control	1	0	0	0	0	0	not just in development but in normal tissue too, you have control	1	0	0	0	0	0	0	0	0	not just in development but in normal tissue too, you have control	1	0	0	0	0	0
inappropriately activated programs	1	0	0	inappropriately activated programs	1	0	0	0	0	0	0	0	0	inappropriately activated programs	1	0	0	0	0	0	inappropriately activated programs	0	0	0	1	0	0	0	0	0	inappropriately activated programs	1	0	0	0	0	0
this time they lack apoptotic control / stays on instead of going off	2	0	0	this time they lack apoptotic control / stays on instead of going off	1	0	0	0	0	0	1	0	0	this time they lack apoptotic control / stays on instead of going off	2	0	0	0	0	0	this time they lack apoptotic control / stays on instead of going off	1	0	0	0	0	0	1	0	0	this time they lack apoptotic control / stays on instead of going off	1	0	0	1	0	0
* examples given of specific issues about control loss *	10	1	0	* examples given of specific issues about control loss *	8	1	0	0	0	0	2	0	0	* examples given of specific issues about control loss *	7	0	0	3	1	0	* examples given of specific issues about control loss *	4	0	0	3	0	0	3	1	0	* examples given of specific issues about control loss *	5	0	0	5	1	0
cells' response is inaccurate	0	1	0	cells' response is inaccurate	0	1	0	0	0	0	0	0	0	cells' response is inaccurate	0	0	0	0	1	0	cells' response is inaccurate	0	0	0	0	0	0	0	1	0	cells' response is inaccurate	0	0	0	0	1	0
wrong place	1	0	0	wrong place	1	0	0	0	0	0	0	0	0	wrong place	0	0	0	1	0	0	wrong place	0	0	0	0	0	0	1	0	0	wrong place	0	0	0	1	0	0
in cancel cells loose directionality and end up at the wrong place	1	0	0	in cancel cells loose directionality and end up at the wrong place	1	0	0	0	0	0	0	0	0	in cancel cells loose directionality and end up at the wrong place	1	0	0	0	0	0	in cancel cells loose directionality and end up at the wrong place	1	0	0	0	0	0	0	0	0	in cancel cells loose directionality and end up at the wrong place	1	0	0	0	0	0
signals get messed up / signalling gets stuck	2	0	0	signals get messed up / signalling gets stuck	2	0	0	0	0	0	0	0	0	signals get messed up / signalling gets stuck	1	0	0	1	0	0	signals get messed up / signalling gets stuck	1	0	0	0	0	0	1	0	0	signals get messed up / signalling gets stuck	1	0	0	1	0	0
development and normal tissue follow intrinsic signals but now follow extrinsic signals	1	0	0	development and normal tissue follow intrinsic signals but now follow extrinsic signals	1	0	0	0	0	0	0	0	0	development and normal tissue follow intrinsic signals but now follow extrinsic signals	1	0	0	0	0	0	development and normal tissue follow intrinsic signals but now follow extrinsic signals	1	0	0	0	0	0	0	0	0	development and normal tissue follow intrinsic signals but now follow extrinsic signals	1	0	0	0	0	0
wrong timing	2	0	0	wrong timing	2	0	0	0	0	0	0	0	0	wrong timing	1	0	0	1	0	0	wrong timing	1	0	0	0	0	0	1	0	0	wrong timing	1	0	0	1	0	0
wrong context	1	0	0	wrong context	1	0	0	0	0	0	0	0	0	wrong context	0	0	0	1	0	0	wrong context	0	0	0	0	0	0	1	0	0	wrong context	0	0	0	1	0	0
not precise coordination of cell division/some divisions missed	1	0	0	not precise coordination of cell division/some divisions missed	1	0	0	0	0	0	0	0	0	not precise coordination of cell division/some divisions missed	1	0	0	0	0	0	not precise coordination of cell division/some divisions missed	1	0	0	0	0	0	0	0	0	not precise coordination of cell division/some divisions missed	1	0	0	0	0	0
this time is using cues beyond usual developmental cues	1	0	0	this time is using cues beyond usual developmental cues	0	0	0	1	0	0	0	0	0	this time is using cues beyond usual developmental cues	1	0	0	0	0	0	this time is using cues beyond usual developmental cues	0	0	0	0	0	0	1	0	0	this time is using cues beyond usual developmental cues	0	0	0	1	0	0
this time is also using cues from normal adult tissue	1	0	0	this time is also using cues from normal adult tissue	0	0	0	1	0	0	0	0	0	this time is also using cues from normal adult tissue	1	0	0	0	0	0	this time is also using cues from normal adult tissue	0	0	0	0	0	0	1	0	0	this time is also using cues from normal adult tissue	0	0	0	1	0	0
there are some changes from development, some adaptation	1	0	0	there are some changes from development, some adaptation	0	0	0	1	0	0	0	0	0	there are some changes from development, some adaptation	1	0	0	0	0	0	there are some changes from development, some adaptation	0	0	0	0	0	0	1	0	0	there are some changes from development, some adaptation	0	0	0	1	0	0
* genetic changes *	3	0	0	* genetic changes *	1	0	0	1	0	0	1	0	0	* genetic changes *	1	0	0	2	0	0	* genetic changes *	2	0	0	1	0	0	0	0	0	* genetic changes *	1	0	0	2	0	0
due to epigenetics	1	0	0	due to epigenetics	1	0	0	0	0	0	0	0	0	due to epigenetics	0	0	0	1	0	0	due to epigenetics	0	0	0	1	0	0	0	0	0	due to epigenetics	0	0	0	1	0	0
genetic change	1	0	0	genetic change	0	0	0	0	0	0	1	0	0	genetic change	1	0	0	0	0	0	genetic change	1	0	0	0	0	0	0	0	0	genetic change	1	0	0	0	0	0
genes reprogrammed to do different things	1	0	0	genes reprogrammed to do different things	0	0	0	1	0	0	0	0	0	genes reprogrammed to do different things	0	0	0	1	0	0	genes reprogrammed to do different things	1	0	0	0	0	0	0	0	0	genes reprogrammed to do different things	0	0	0	1	0	0

[truncated: 1 more sheets: development_main-groups]
