# Supplementary material for: Conflicting Biomedical Assumptions for Mathematical Modeling: The Case of Cancer Metastasis
Source: PLoS Comput Biol. 2011 Oct 6;7(10):e1002132. doi: 10.1371/journal.pcbi.1002132 (PMC3188482; doi:10.1371/journal.pcbi.1002132)
Supplement: Dataset S3 — Formal representation cascade (annotated PDF file). (PDF) [file pcbi.1002132.s003.pdf]

# ANNOTATIONS

Node [N]  
N1 --> N2 = edge & direction  
y = yes (= 100%)  
n = no  
{ } = together  
( ) = open boundaries  
[ ] = closed boundaries  
[N1, N2] = from the beginning of N1 until the end of N2  
( ) = open boundaries  
(N1, N2) = after the end of N1 and before the beginning of N2  
&& = "and", both together  
process [N1, N2... Nn] = process at all nodes

## Comments/Explanations

ABC together

C <--> B

C --> AB

AC --> B

D <--> C

0\_vessel infiltration

0\_interactions with stroma

0\_events at primary

A\_EMT starts

A\_lymph- & angio- genesis starts

A\_ECM remodelling

B\_EMT

B/D\_lymph- & angio- genesis

C/E/F/G\_lymph- & angio- genesis

E\_(progressive) growth

E --> E1, E2, E3, E4...

F\_interactions with stroma

G\_interactions with stroma

something happens to cell

go somewhere

survival in circulation

energy perturbations

metastatic niche

trigger

angiogenesis

oligometastasis

interactions with stroma

wide metastasis

metastatic seeding (after A, before E)

EMT starts (after primary)

floating around (after A, before C)

adhesion (after A, before E)

angiogenesis (before B)

MET (before E)

|                                                                  | PROPOSED | PhDs (15) | MDs (7) | MD/PhDs (6) | All (28) |
|------------------------------------------------------------------|----------|-----------|---------|-------------|----------|
| Primary [P]                                                      | y        | 12        | 7       | 6           | 25       |
| Detachment [A]                                                   | y        | 11        | 6.5     | 6           | 23.5     |
| Invasion [I]                                                     | y        | 10        | 5       | 3           | 18       |
| Breach ECM [R]                                                   | y        | 9         | 5       | 2.5         | 16.5     |
| Intravasation [V]                                                | y        | 10.5      | 4       | 4           | 18.5     |
| [B] = {I, R, V}                                                  | y        | 9         | 4       | 2           | 15       |
| Motility [O]                                                     | y        | 9         | 6       | 2.5         | 17.5     |
| Migration [T]                                                    | y        | 9         | 6       | 4           | 19       |
| [C] = {O, T}                                                     | y        | 9         | 6       | 2.5         | 17.5     |
| Extravasation [D]                                                | y        | 7.5       | 4       | 3.5         | 15       |
| Colonization [L]                                                 | y        | 13        | 8       | 6           | 27       |
| Proliferation [X]                                                | y        | 13        | 6       | 5           | 24       |
| Angiogenesis [S]                                                 | y        | 12.5      | 6       | 4           | 22.5     |
| [E] = {L, X, S}                                                  | y        | 12        | 6       | 4           | 22       |
| Micrometastasis [F]                                              | y        | 13        | 6       | 6           | 25       |
| Macrometastasis [G]                                              | y        | 12        | 6       | 5           | 23       |
| P --> A                                                          | y        |           |         |             |          |
| A --> B                                                          | y        |           |         |             |          |
| B --> C                                                          | y        |           |         |             |          |
| C --> D                                                          | y        |           |         |             |          |
| D --> E                                                          | y        |           |         |             |          |
| E --> F                                                          | y        |           |         |             |          |
| F --> G                                                          | y        |           |         |             |          |
| {A, B, C}                                                        | n        | 3         | 2       | 0           | 5        |
| A --> C --> B --> E                                              | n        | 3         | 1       | 1           | 5        |
| C --> {A, B} --> D                                               | n        | 1         | 1       | 0           | 2        |
| {A, C} --> B --> D                                               | n        | 1         | 0       | 0           | 1        |
| B --> D --> C --> E                                              | n        | 0.5       | 0       | 0           | 0.5      |
| (vessel infiltration) [P]                                        | n        | 0         | 1       | 0           | 1        |
| (interaction with stroma) [P]                                    | n        | 1         | 1       | 0           | 2        |
| (events at primary) [P]                                          | n        | 1         | 0       | 0           | 1        |
| (EMT starts) [A]                                                 | n        | 0.5       | 0       | 0           | 0.5      |
| (lymph- & angio- genesis starts) [A]                             | n        | 0.5       | 0       | 0           | 0.5      |
| (ECM remodelling) [A]                                            | n        | 2         | 0       | 0           | 2        |
| (EMT) [B]                                                        | n        | 0.5       | 0       | 0           | 0.5      |
| (lymph- & angio- genesis) [B, D]                                 | n        | 0.5       | 0       | 0           | 0.5      |
| (lymph- & angio- genesis) [C, E, F, G]                           | n        | 1         | 0       | 0           | 1        |
| (progressive growth) [E]                                         | n        | 2         | 0       | 0           | 2        |
| {E1, E2, E3... En} = [E]                                         | n        | 1         | 0       | 0           | 1        |
| (interactions with stroma) [F]                                   | n        | 1         | 0       | 0           | 1        |
| (interactions with stroma) [G]                                   | n        | 2         | 0       | 0           | 2        |
| (something happens to cell) (P, A)                               | n        | 0         | 0       | 2           | 2        |
| go somewhere (P, A)                                              | n        | 1         | 0       | 0           | 1        |
| survival in circulation (C, D)                                   | n        | 2         | 1       | 1           | 4        |
| energy perturbations (C, D)                                      | n        | 1         | 0       | 0           | 1        |
| metastatic niche (D, E)                                          | n        | 1         | 1       | 0           | 2        |
| trigger (D, E)                                                   | n        | 0         | 1       | 0           | 1        |
| angiogenesis (F, G)                                              | n        | 0.5       | 0       | 1           | 1.5      |
| oligometastasis [X] && G --> X                                   | n        | 1         | 0       | 0           | 1        |
| oligometastasis [X] && G --> X && (interactions with stroma) [X] | n        | 1         | 0       | 0           | 1        |
| oligometastasis [X] && wide metastasis [Z] && G --> X --> Z      | n        | 1         | 0       | 0           | 1        |
| metastatic seeding (A, E)                                        | n        | 0         | 1       | 0           | 1        |
| EMT starts (P, )                                                 | n        | 1.5       | 0       | 0           | 1.5      |
| floating around (A, C)                                           | n        | 0         | 0       | 1           | 1        |
| adhesion (A, E)                                                  | n        | 1         | 0       | 0           | 1        |
| angiogenesis ( , B)                                              | n        | 1         | 0       | 0           | 1        |
| MET ( , E)                                                       | n        | 1         | 0       | 0           | 1        |

These were not explicitly commented, therefore no values.
