# Supplementary material for: Conflicting Biomedical Assumptions for Mathematical Modeling: The Case of Cancer Metastasis
Source: PLOS journal article supplement (doi:10.1371/journal.pcbi.1002132), 2011-10-06
Supplement: S8 (10.1371/journal.pcbi.1002132.s008) [file journal.pcbi.1002132.s008.pdf › journal.pcbi.1002132.s008.pdf]

Degree Type (PhD/MD)

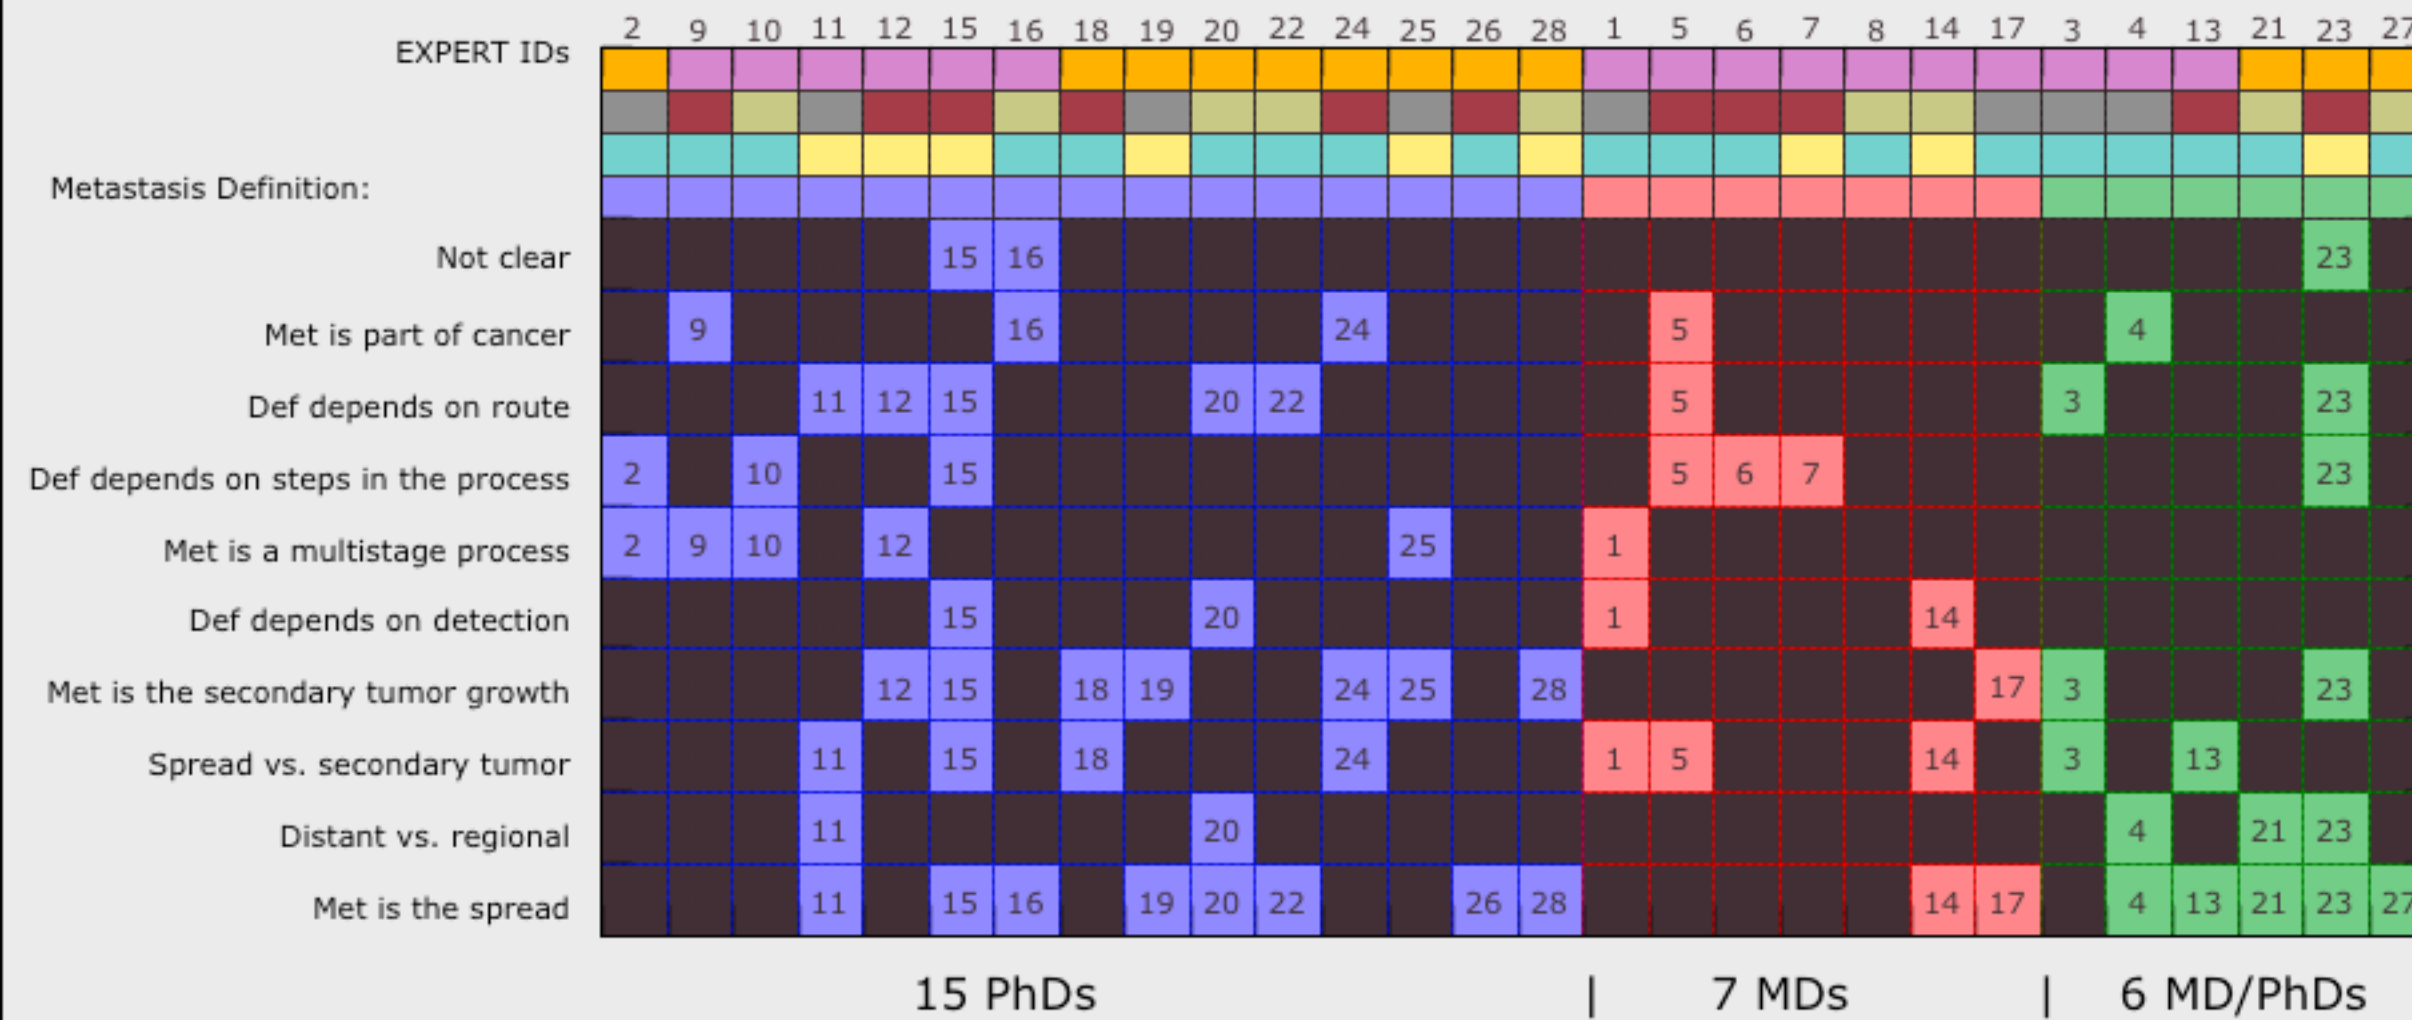

Gender

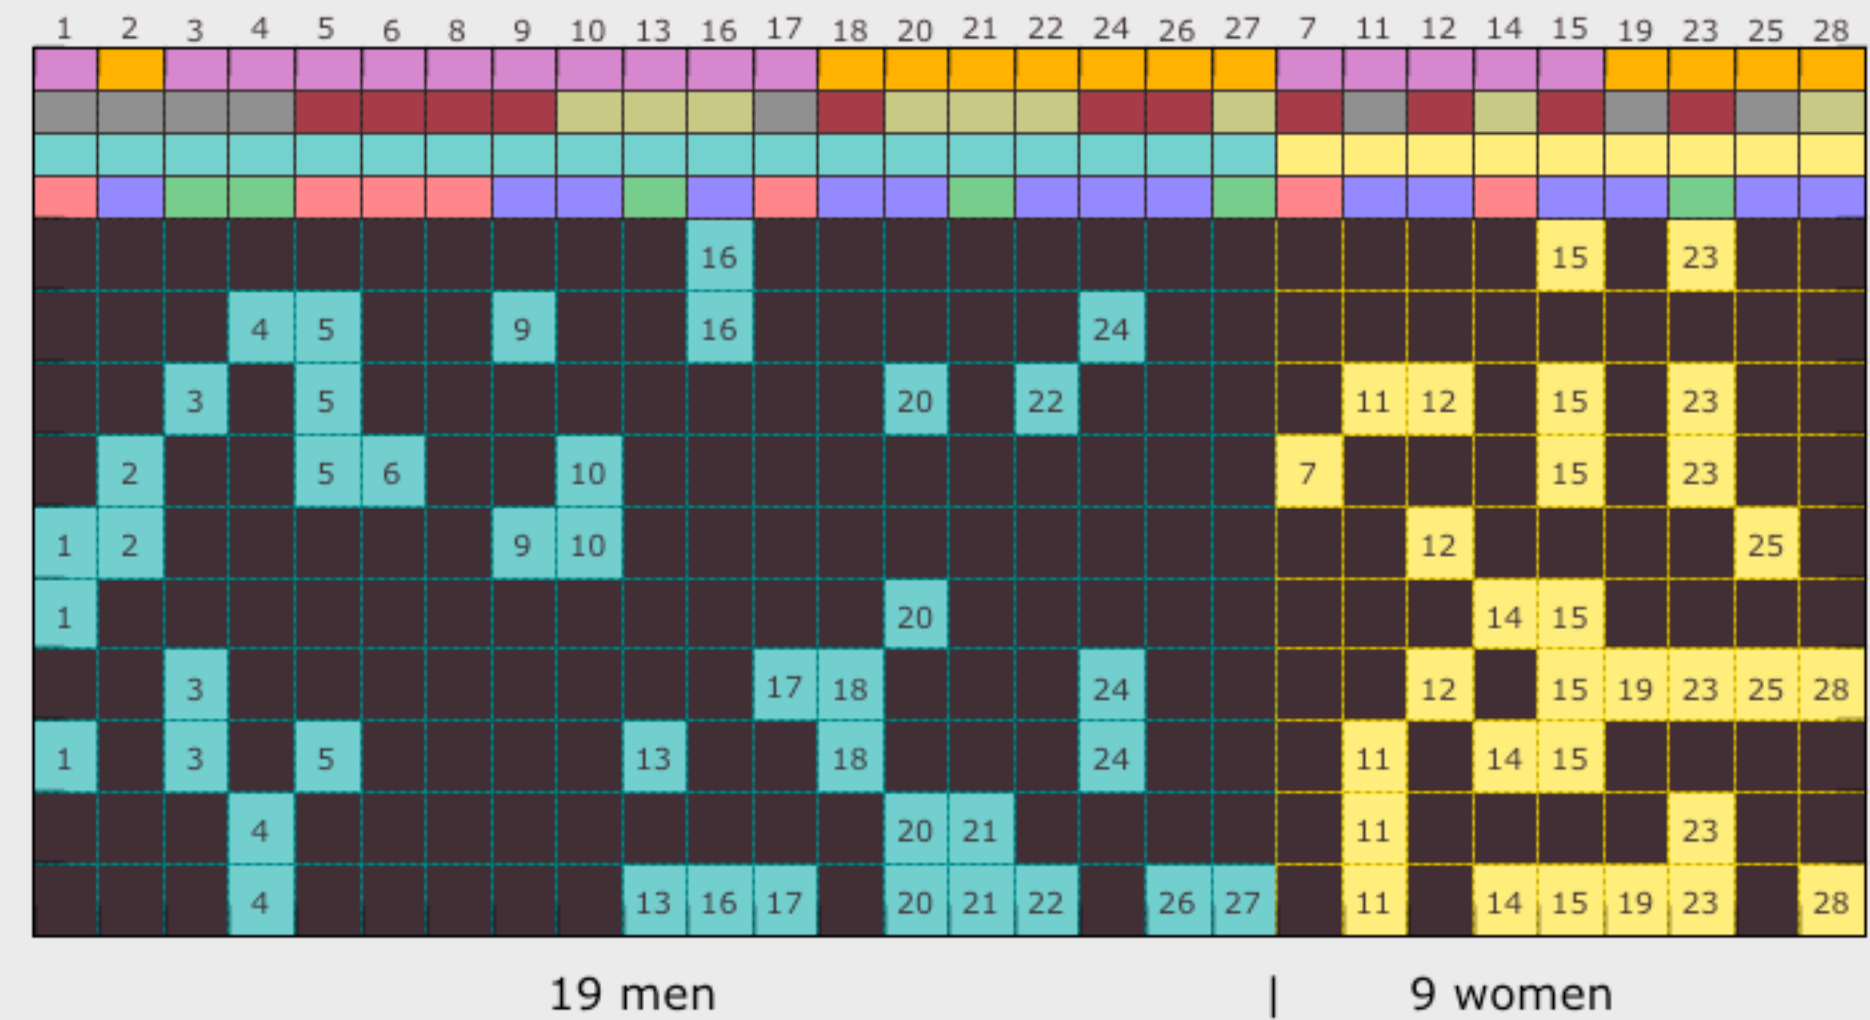

Year they received their first doctoral degree

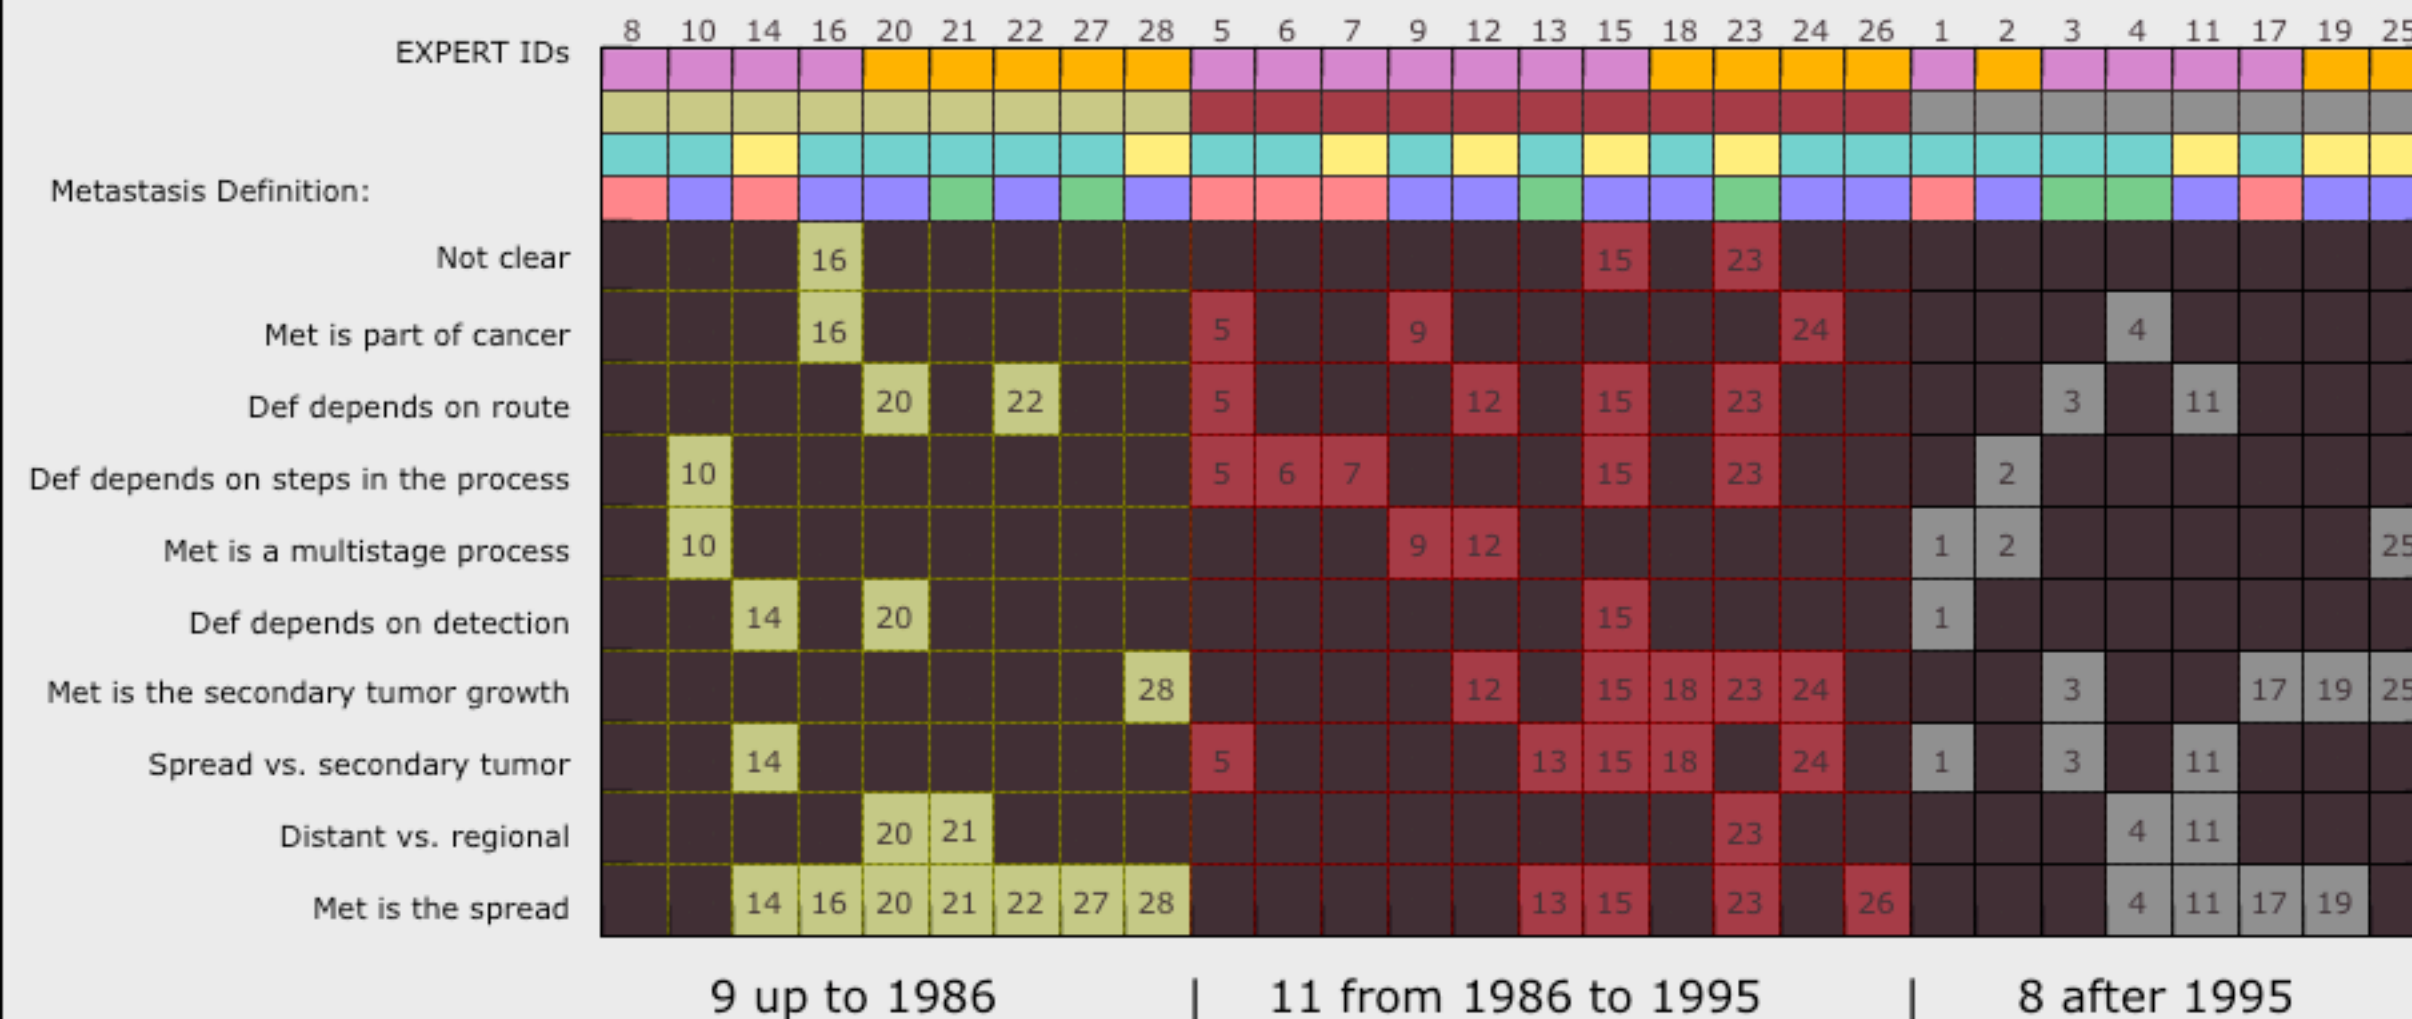

Interview conducted in person or over the phone

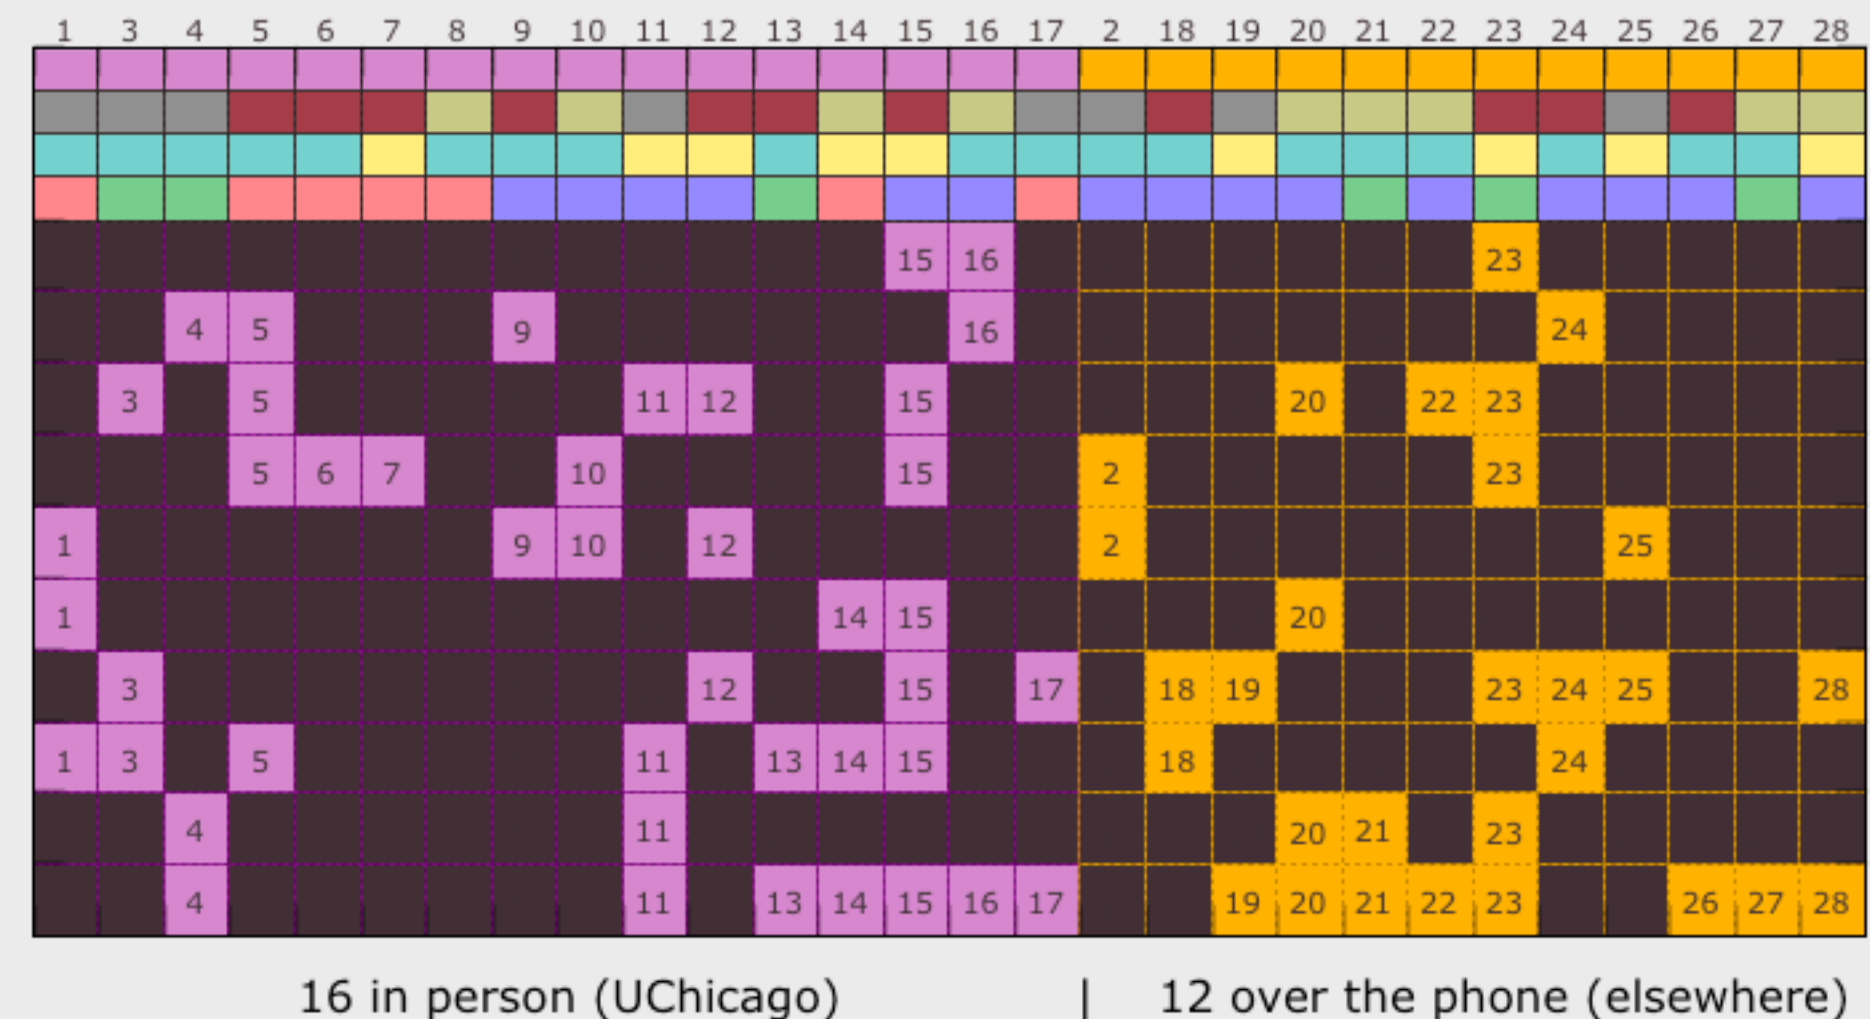

Degree Type (PhD/MD)

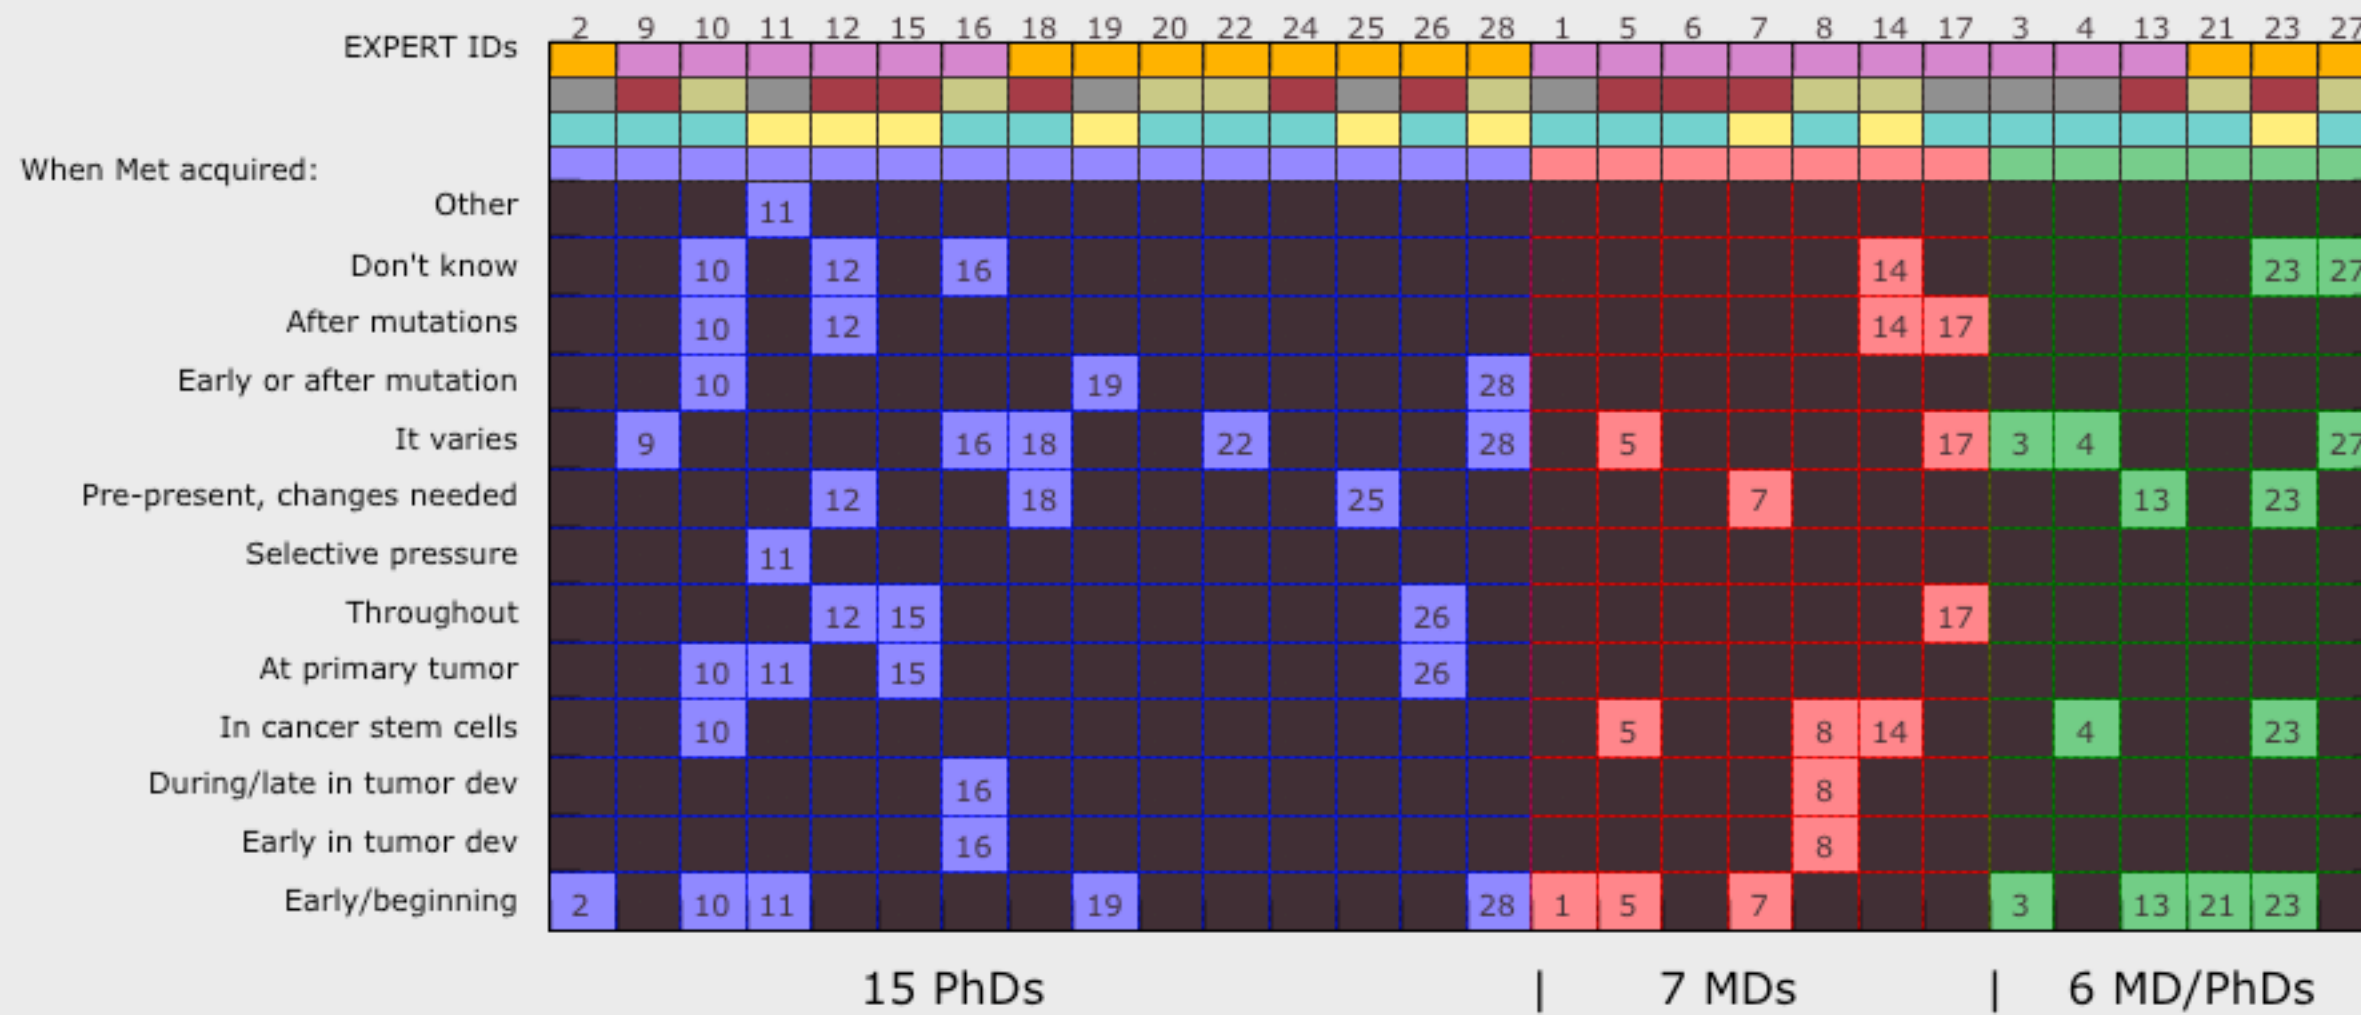

Gender

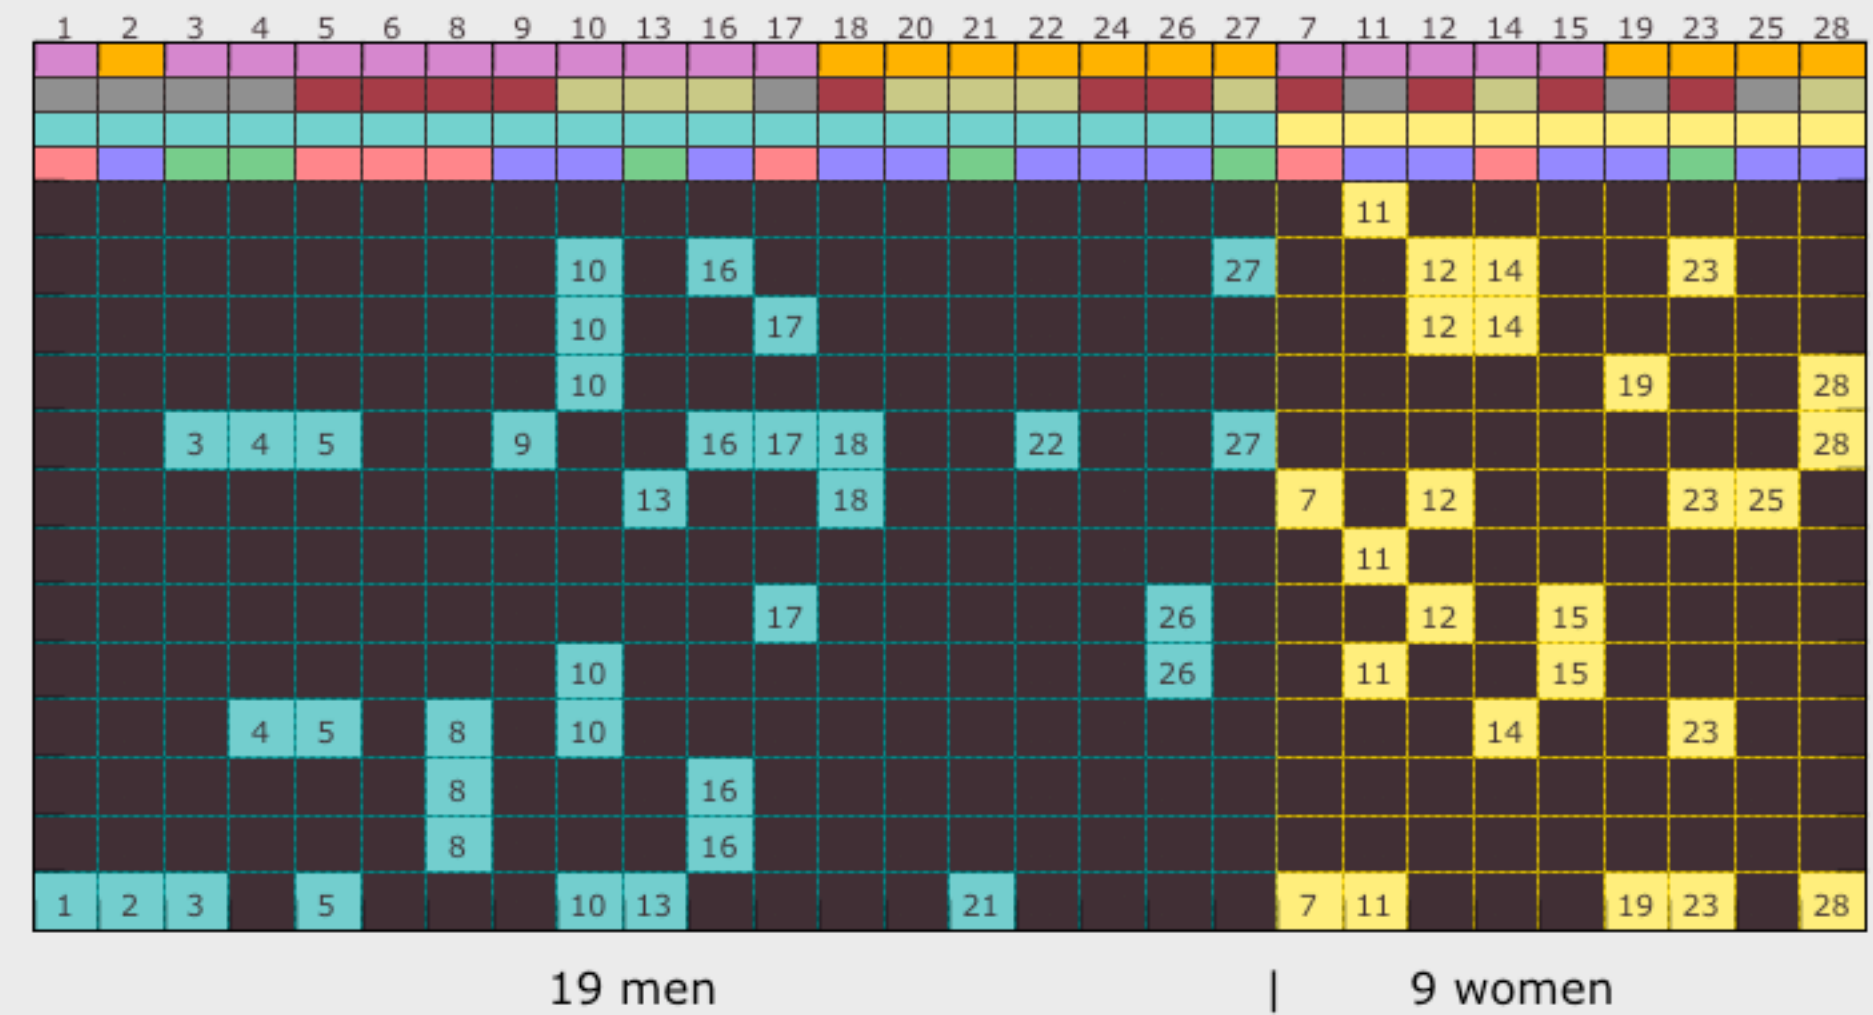

Year they received their first doctoral degree

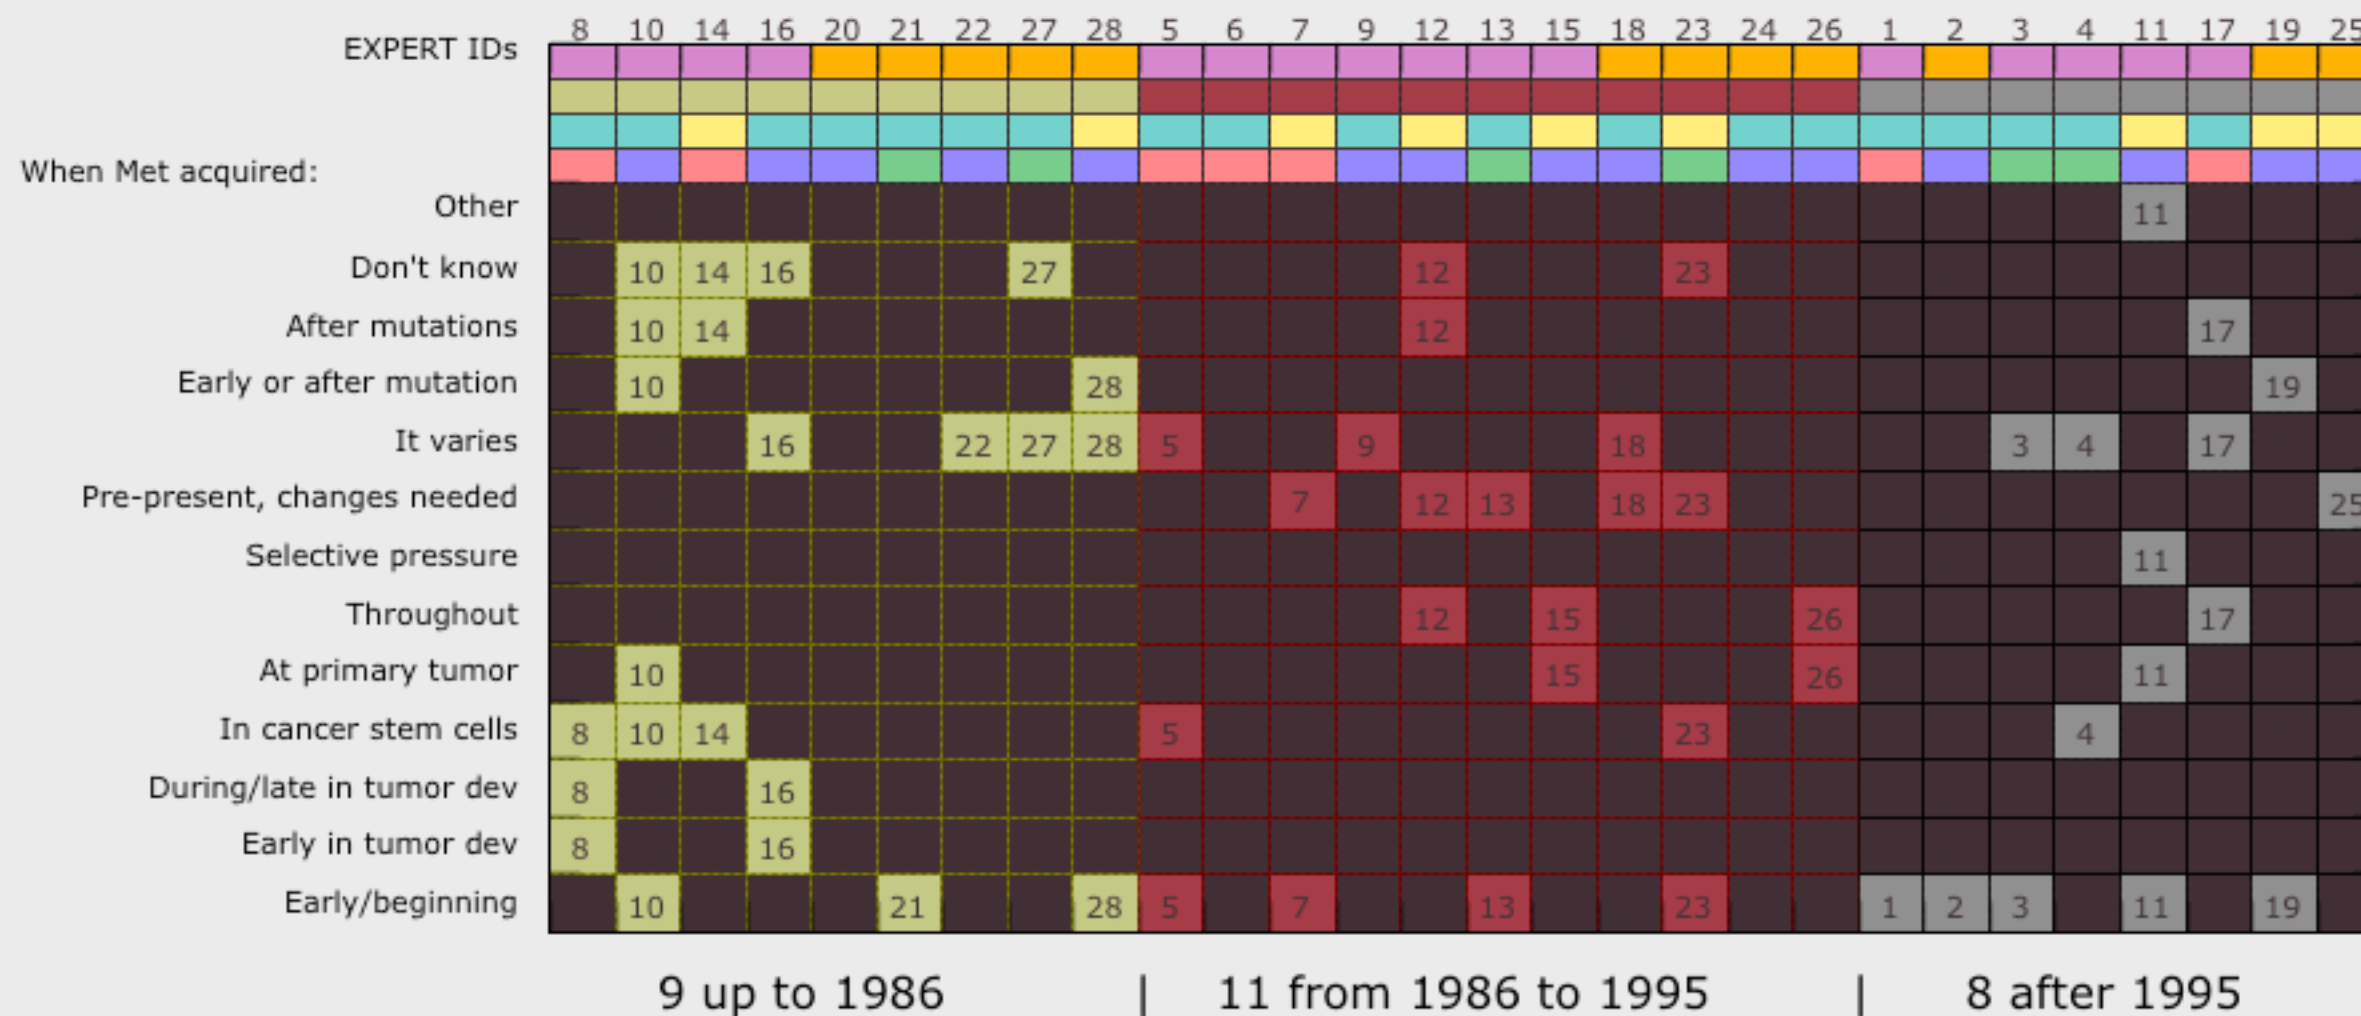

Interview conducted in person or over the phone

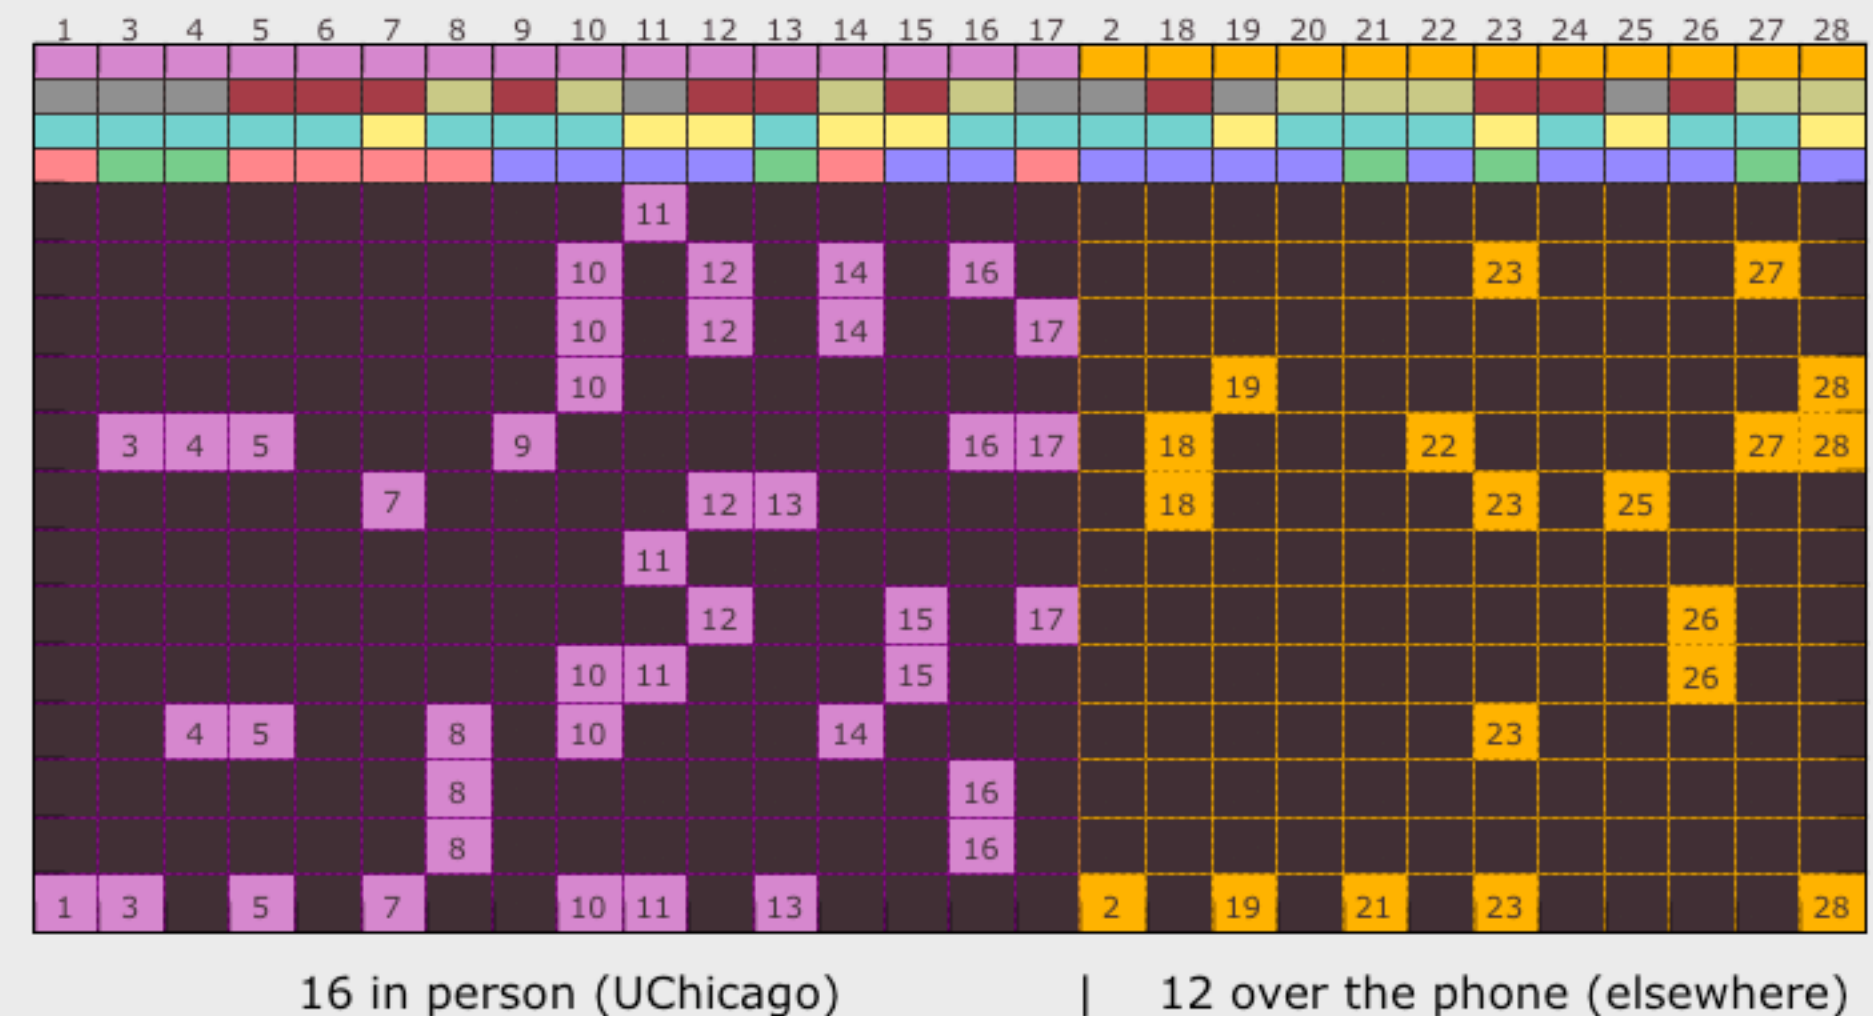



Degree Type (PhD/MD)

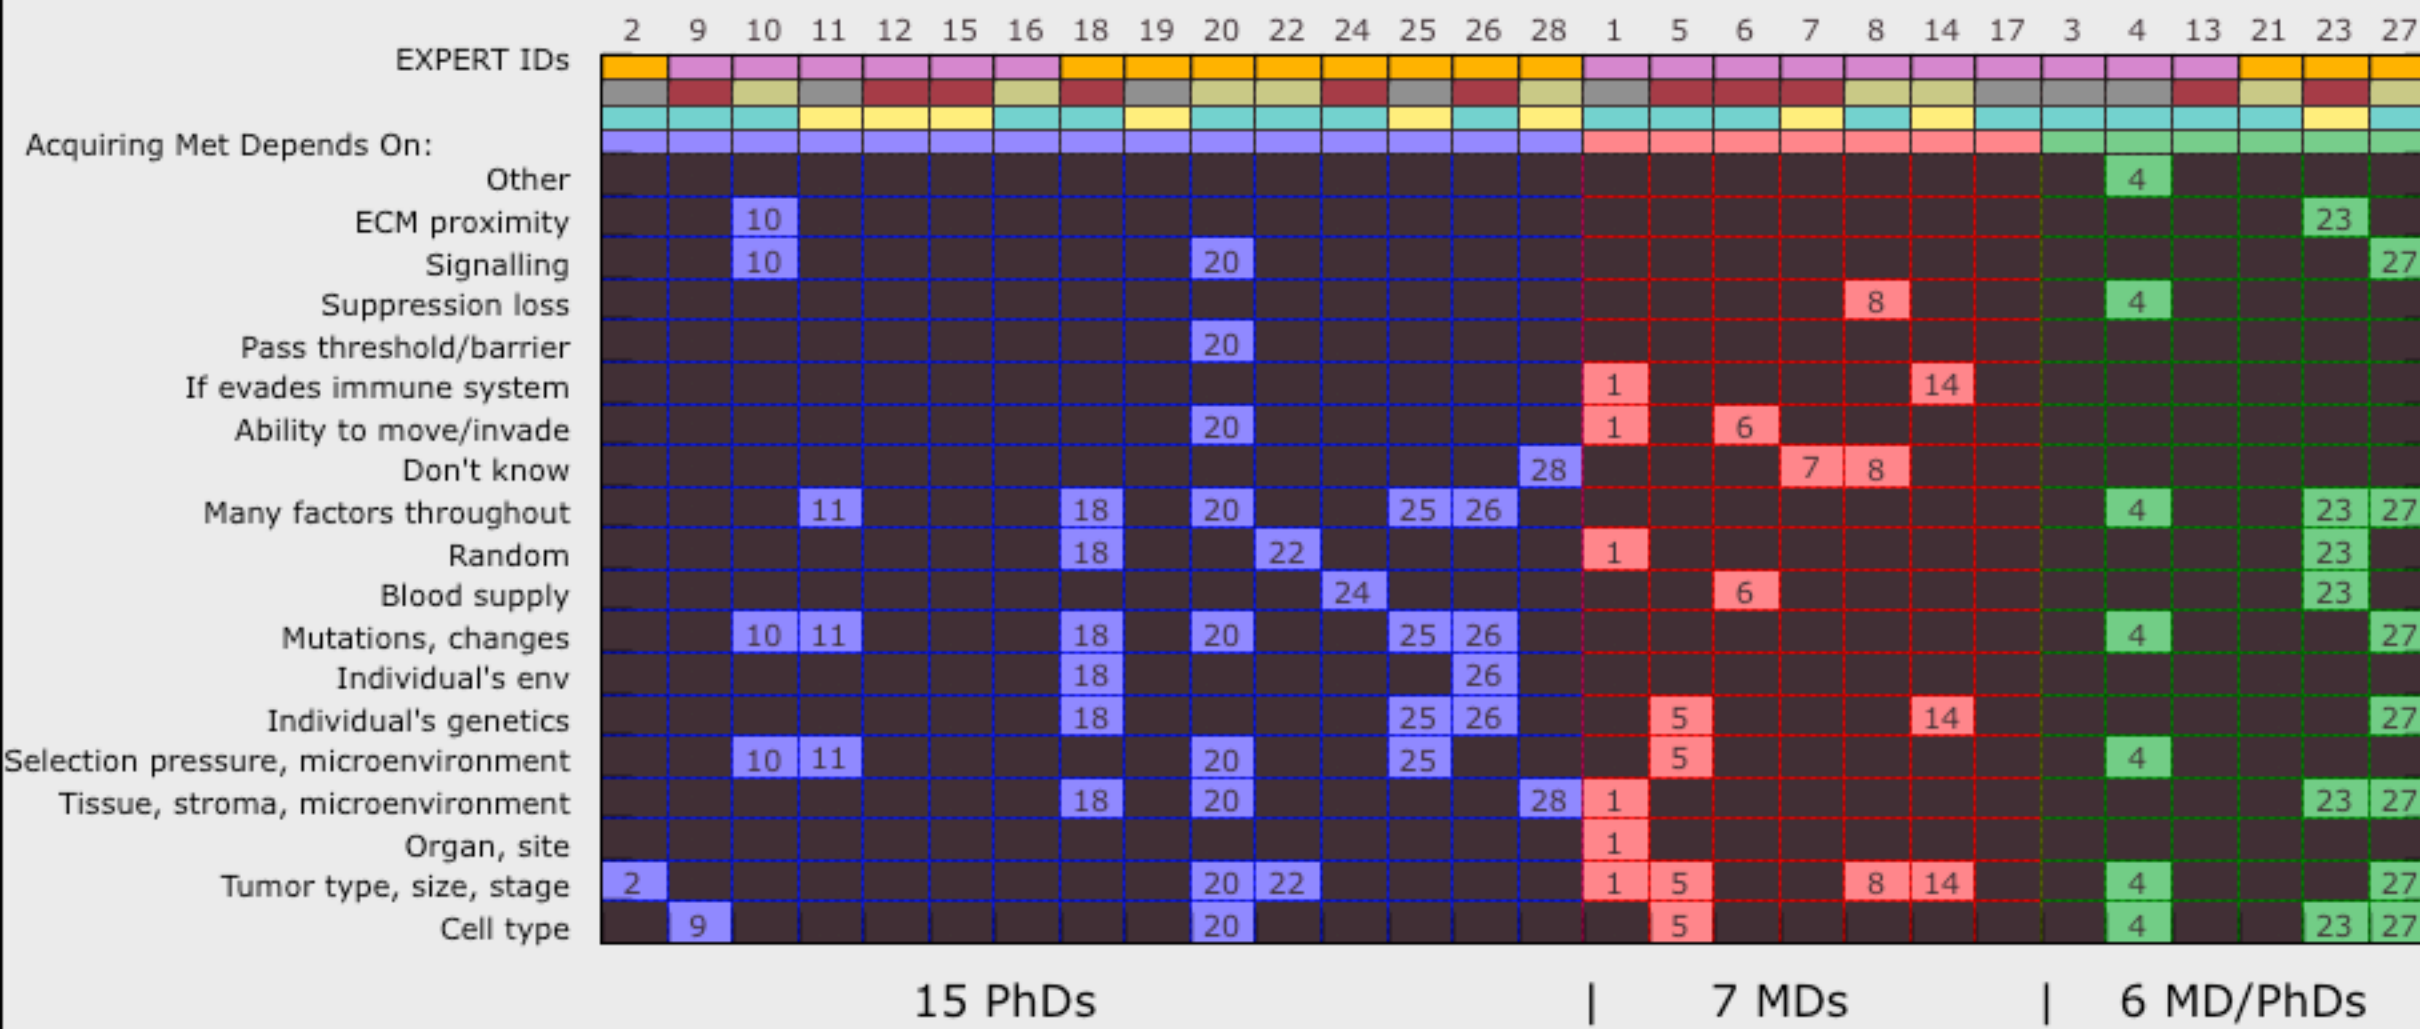

Gender

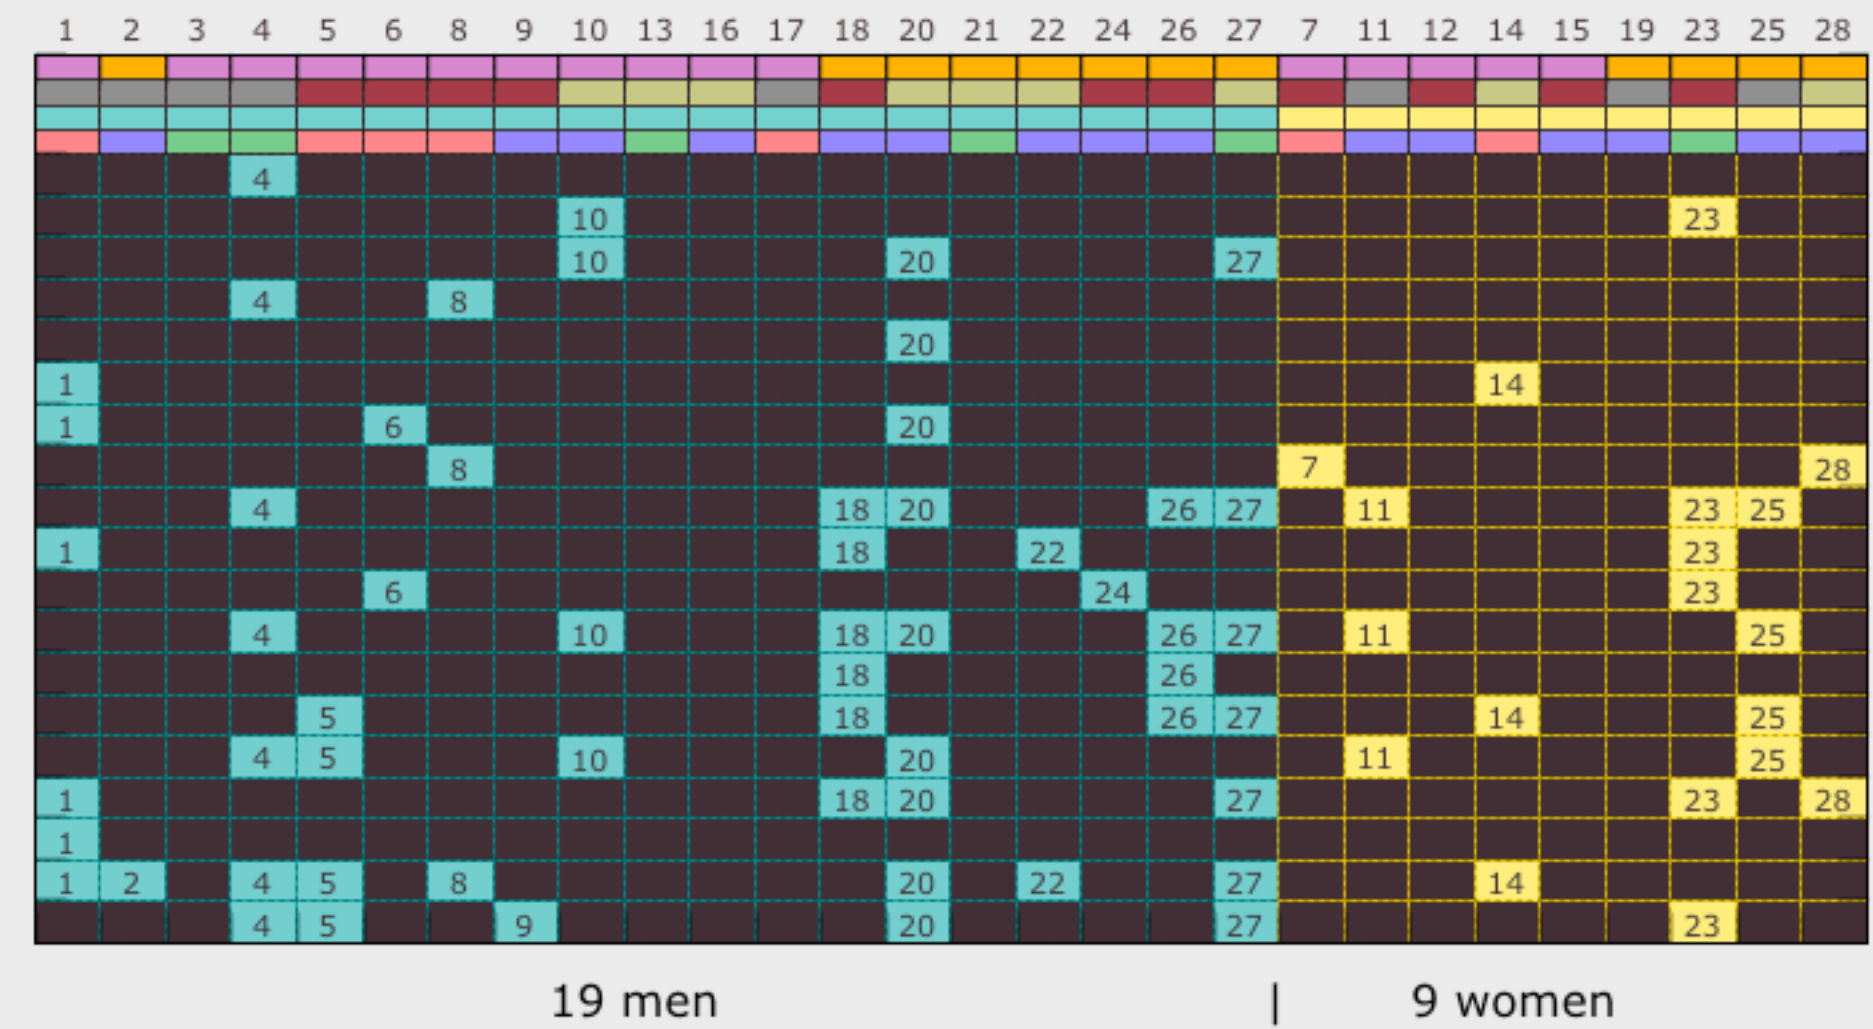

Year they received their first doctoral degree

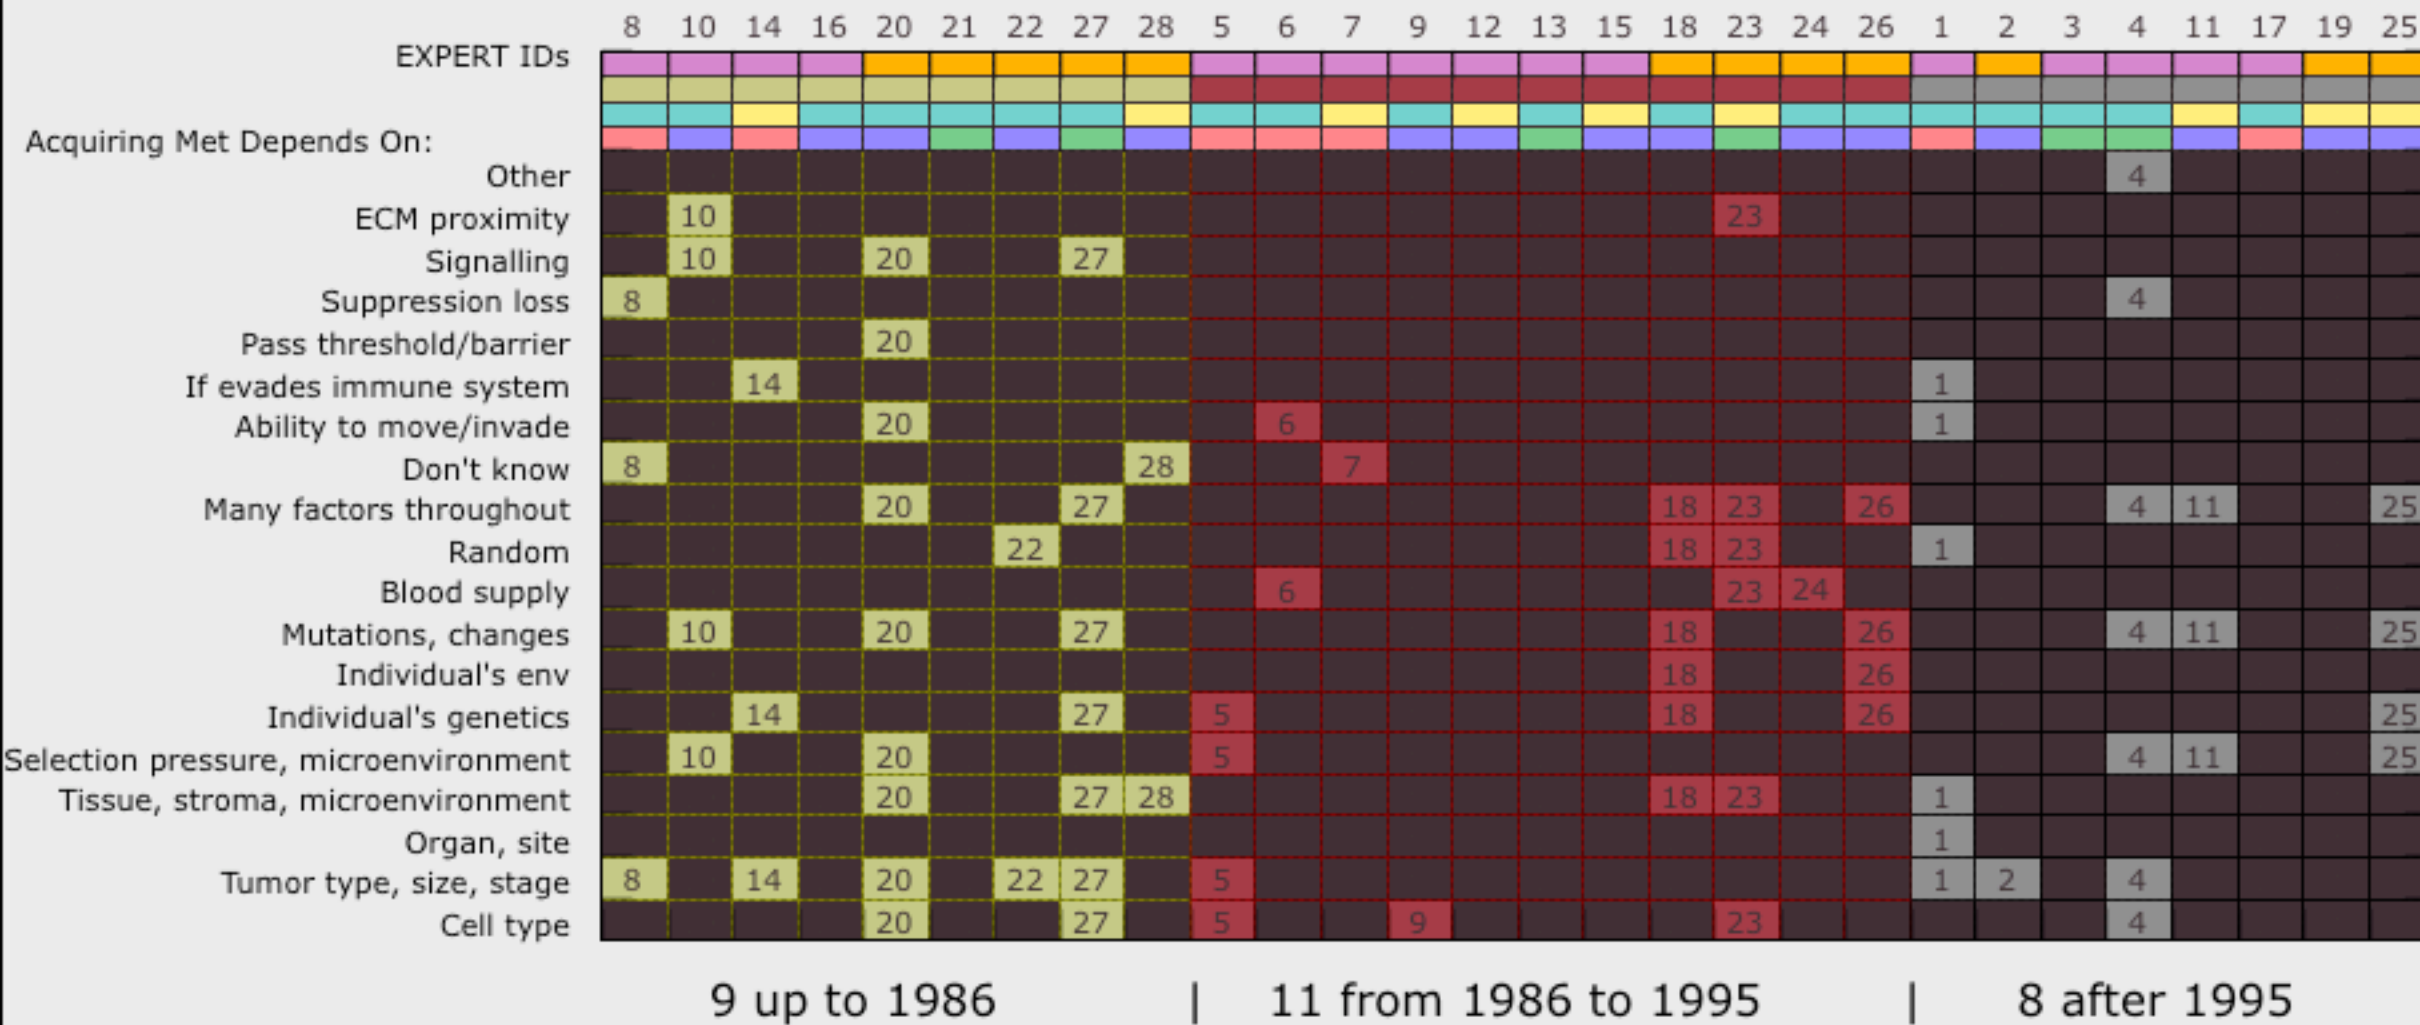

Interview conducted in person or over the phone

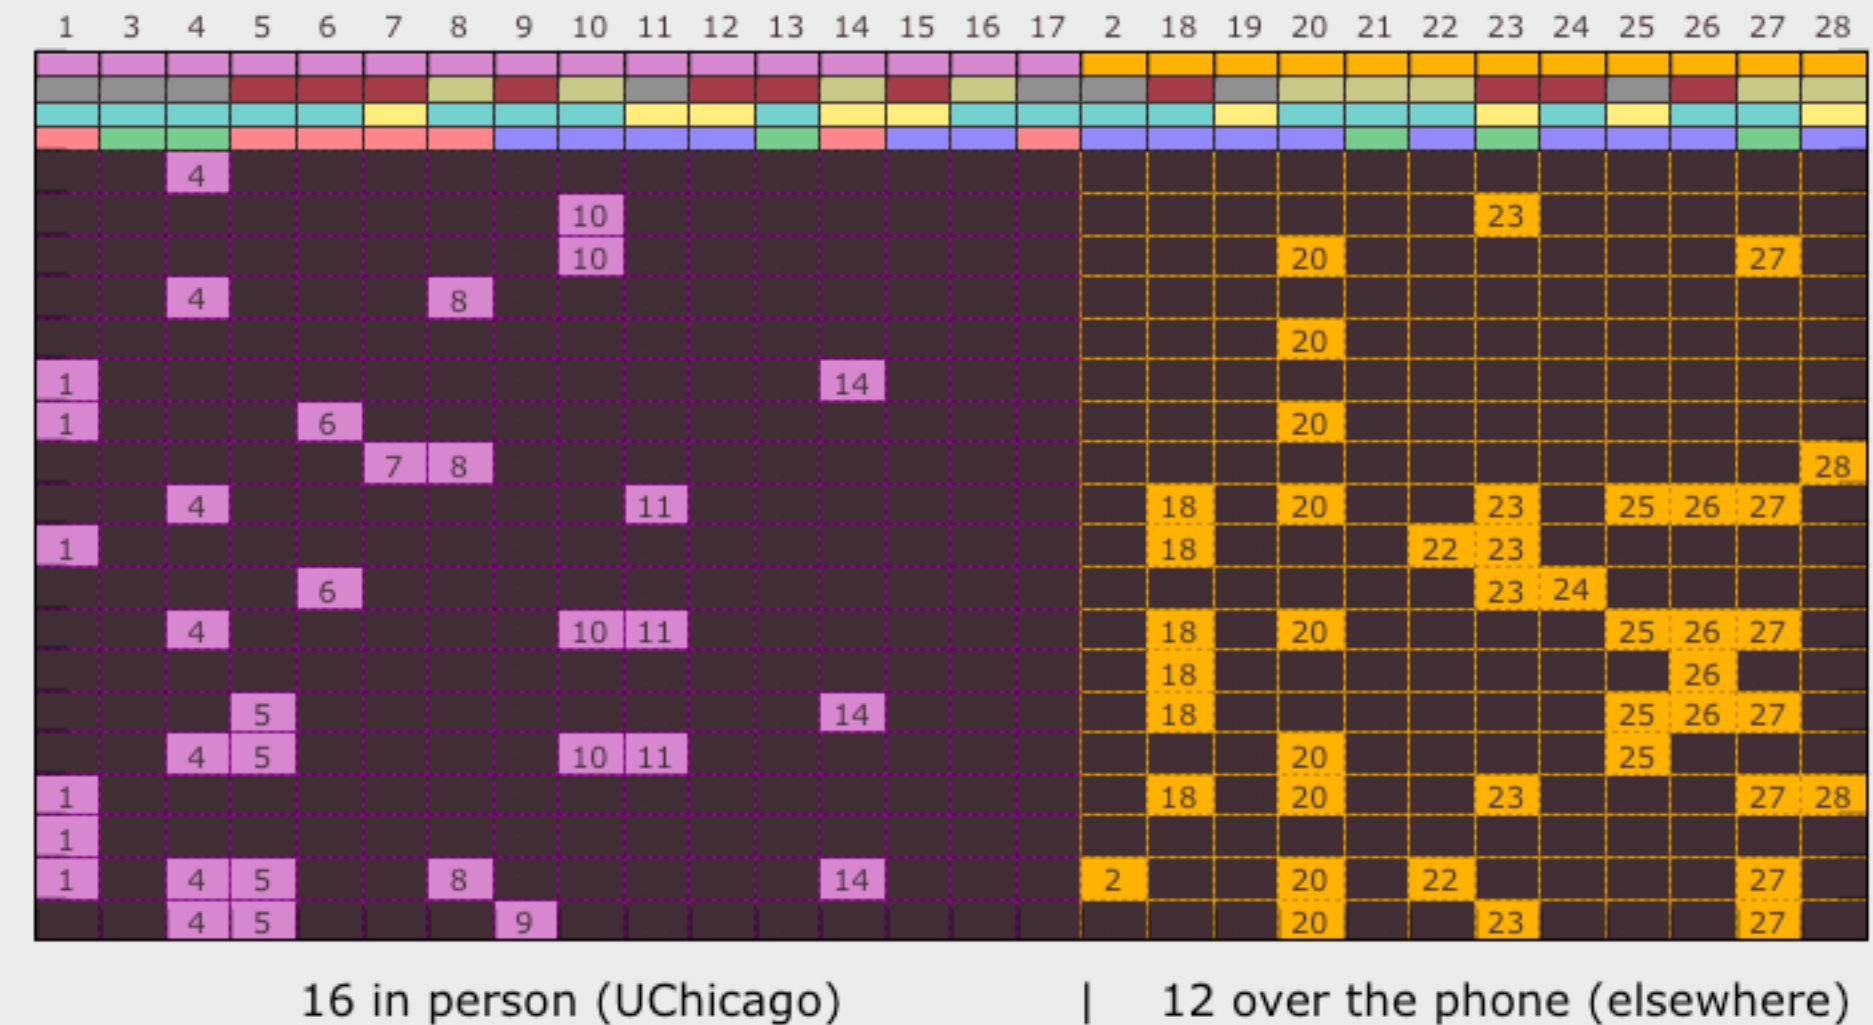

Degree Type (PhD/MD)

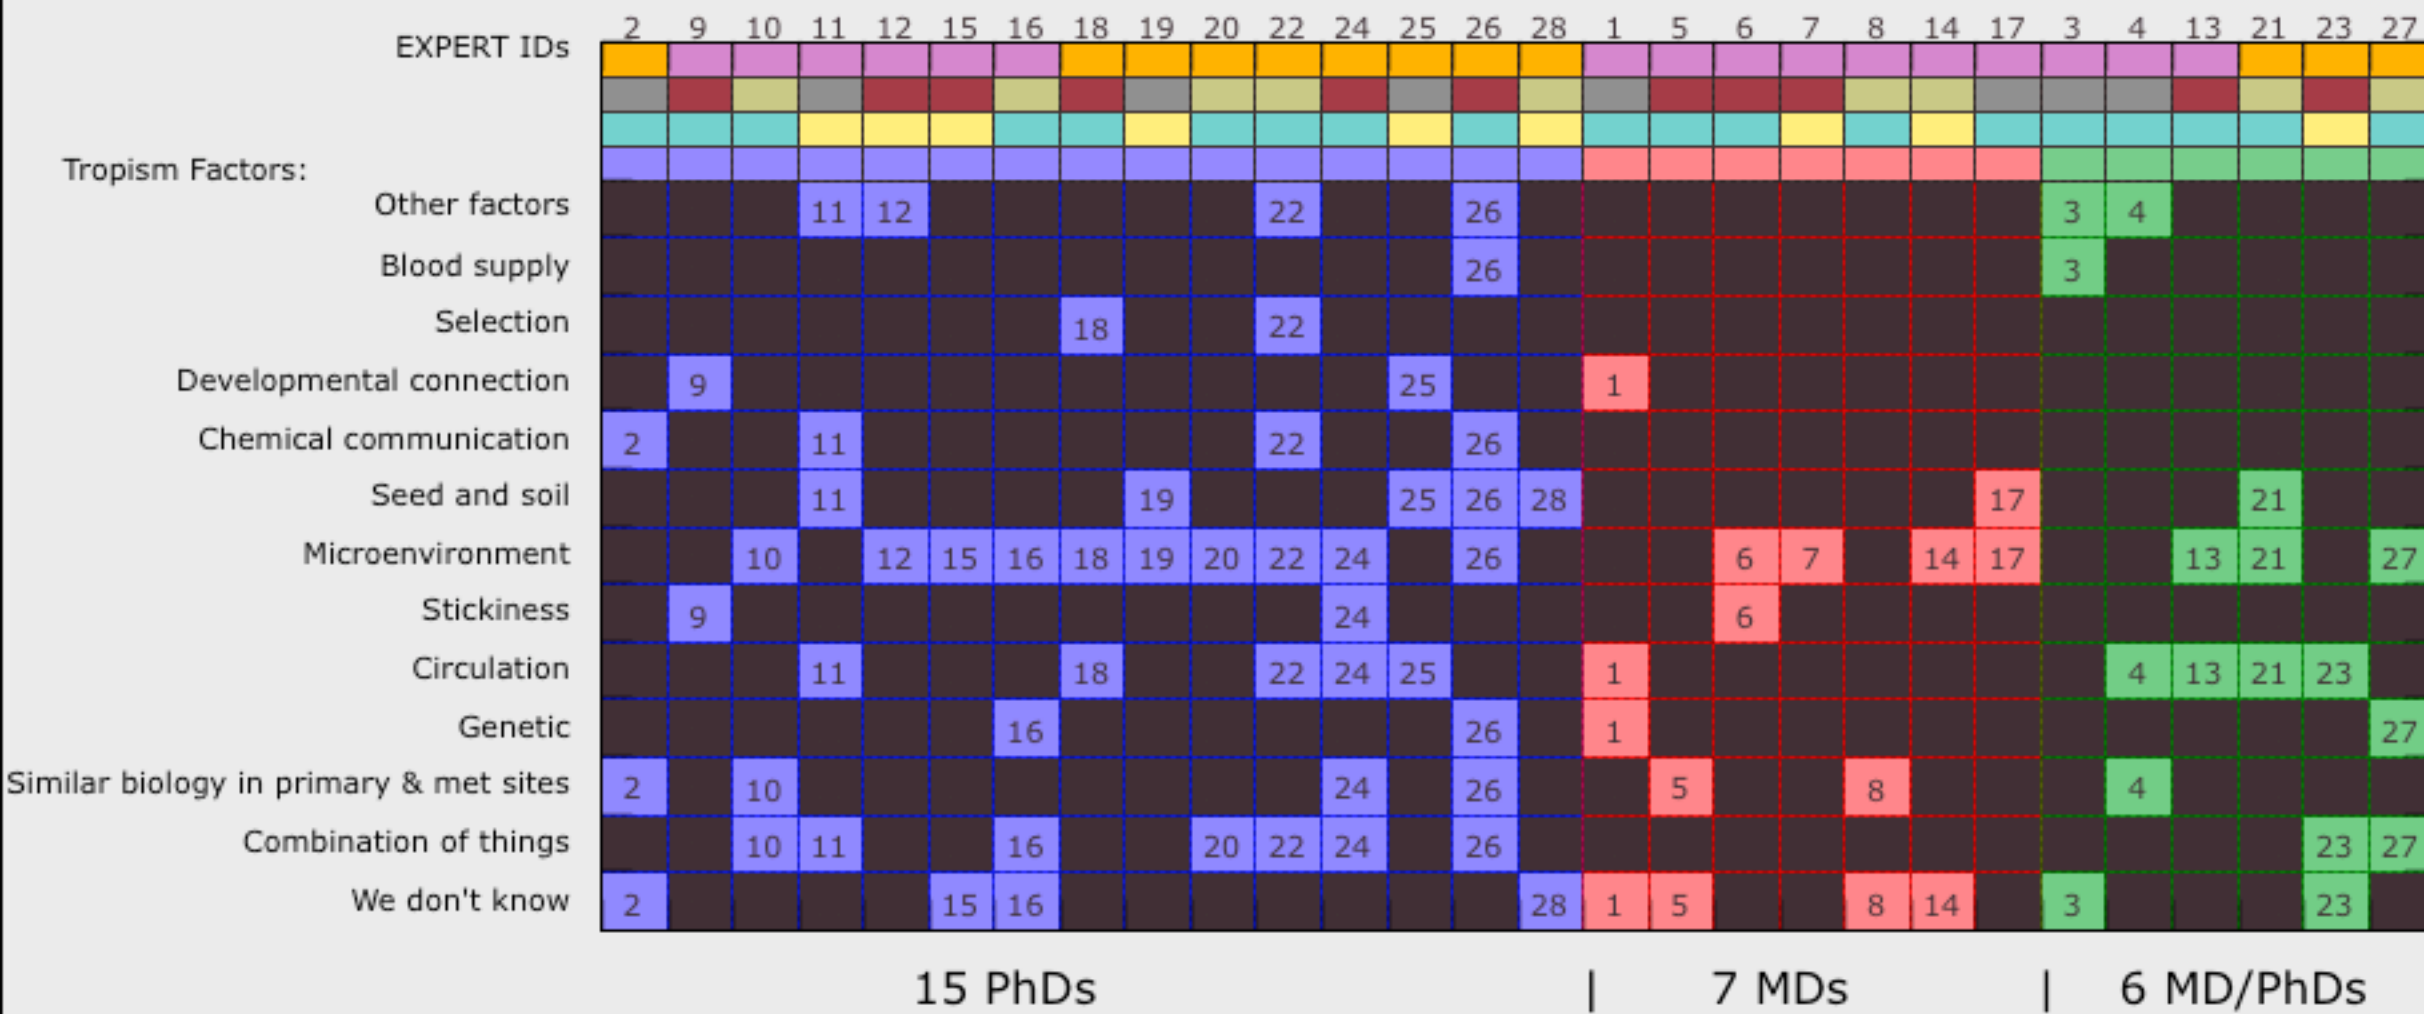

Gender

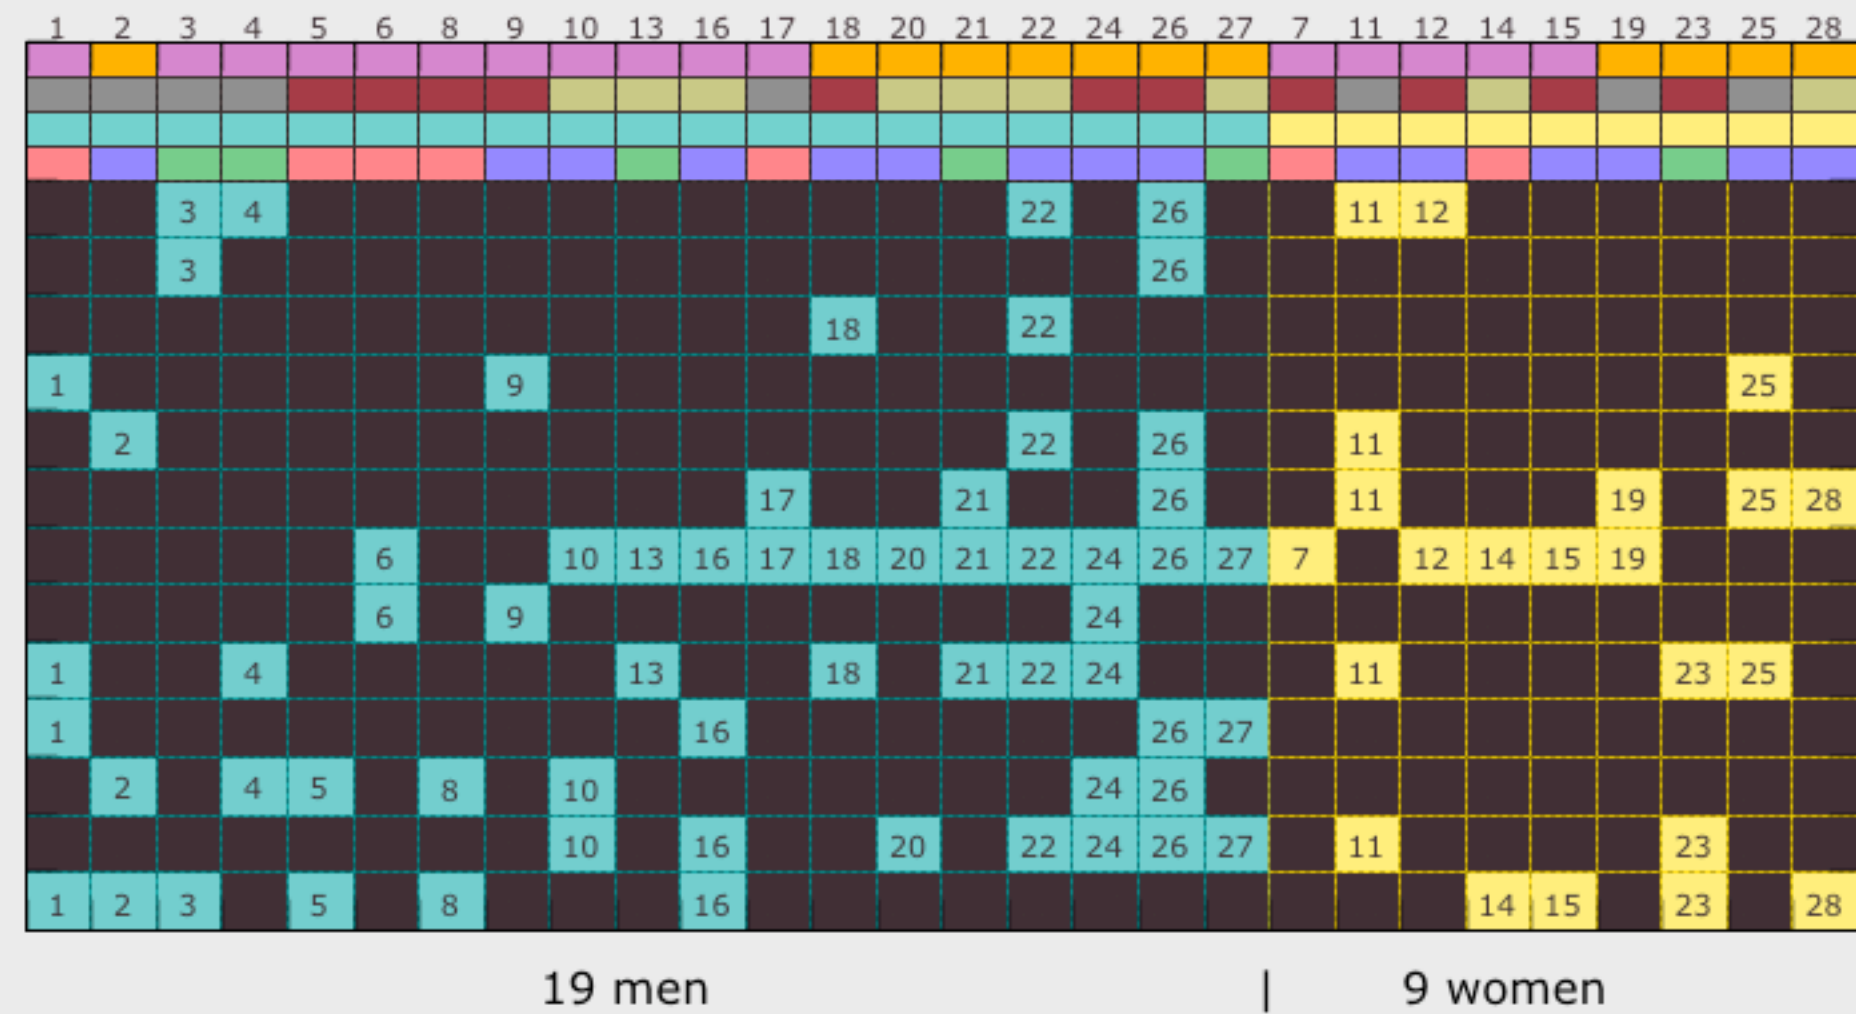

Year they received their first doctoral degree

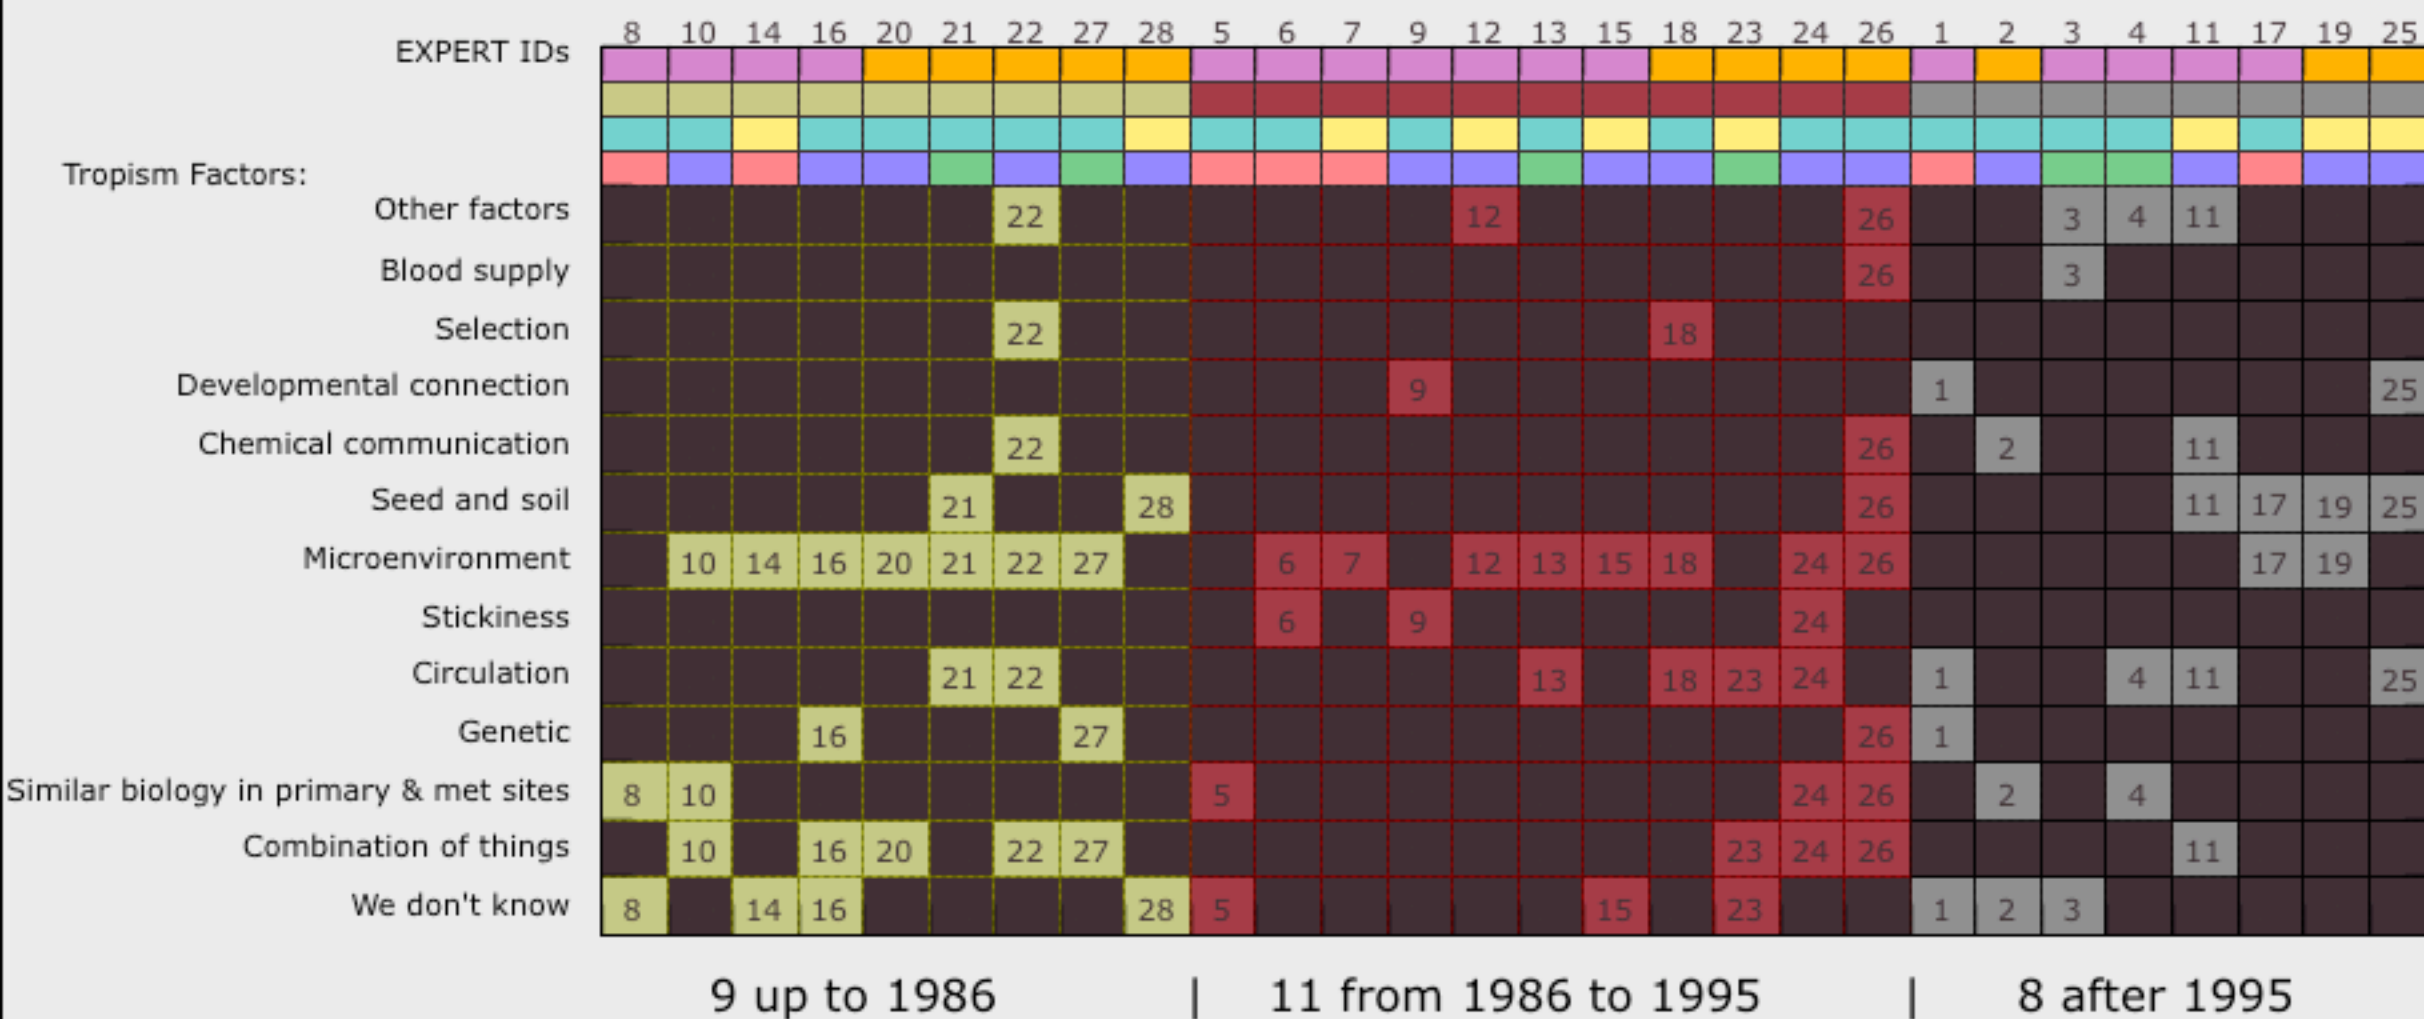

Interview conducted in person or over the phone

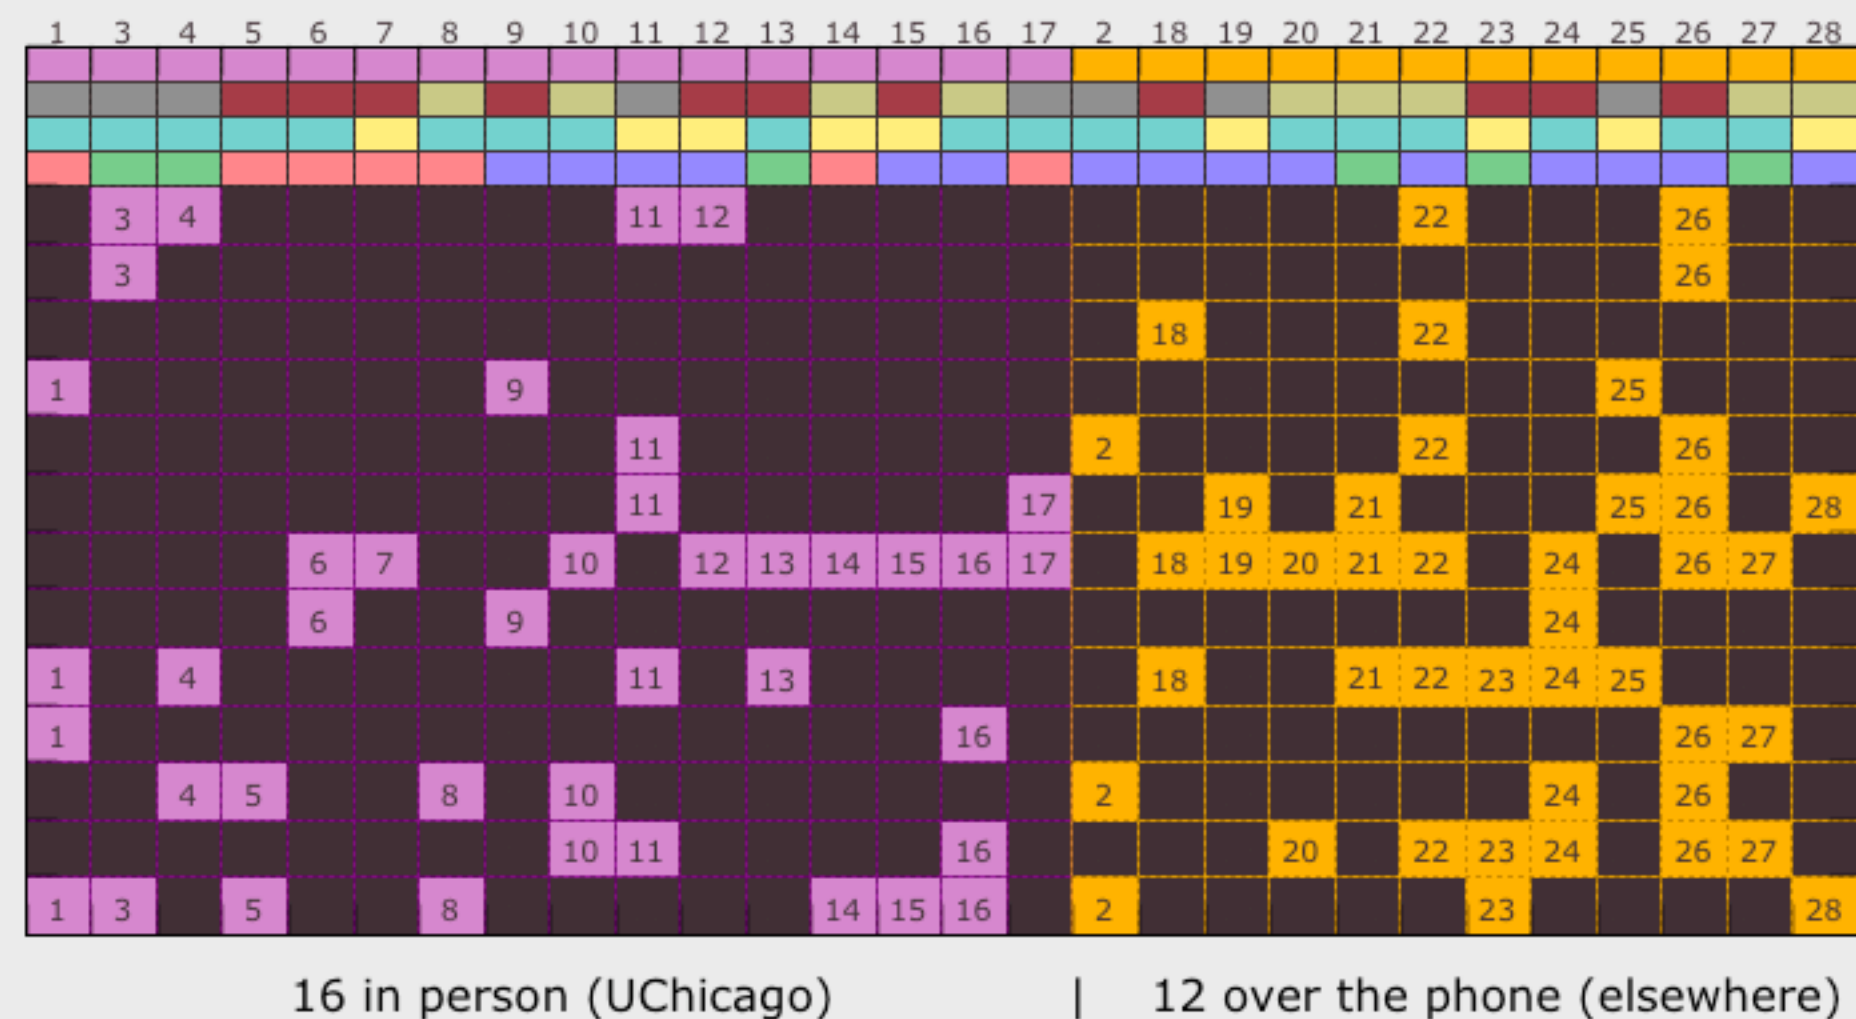



Degree Type (PhD/MD)

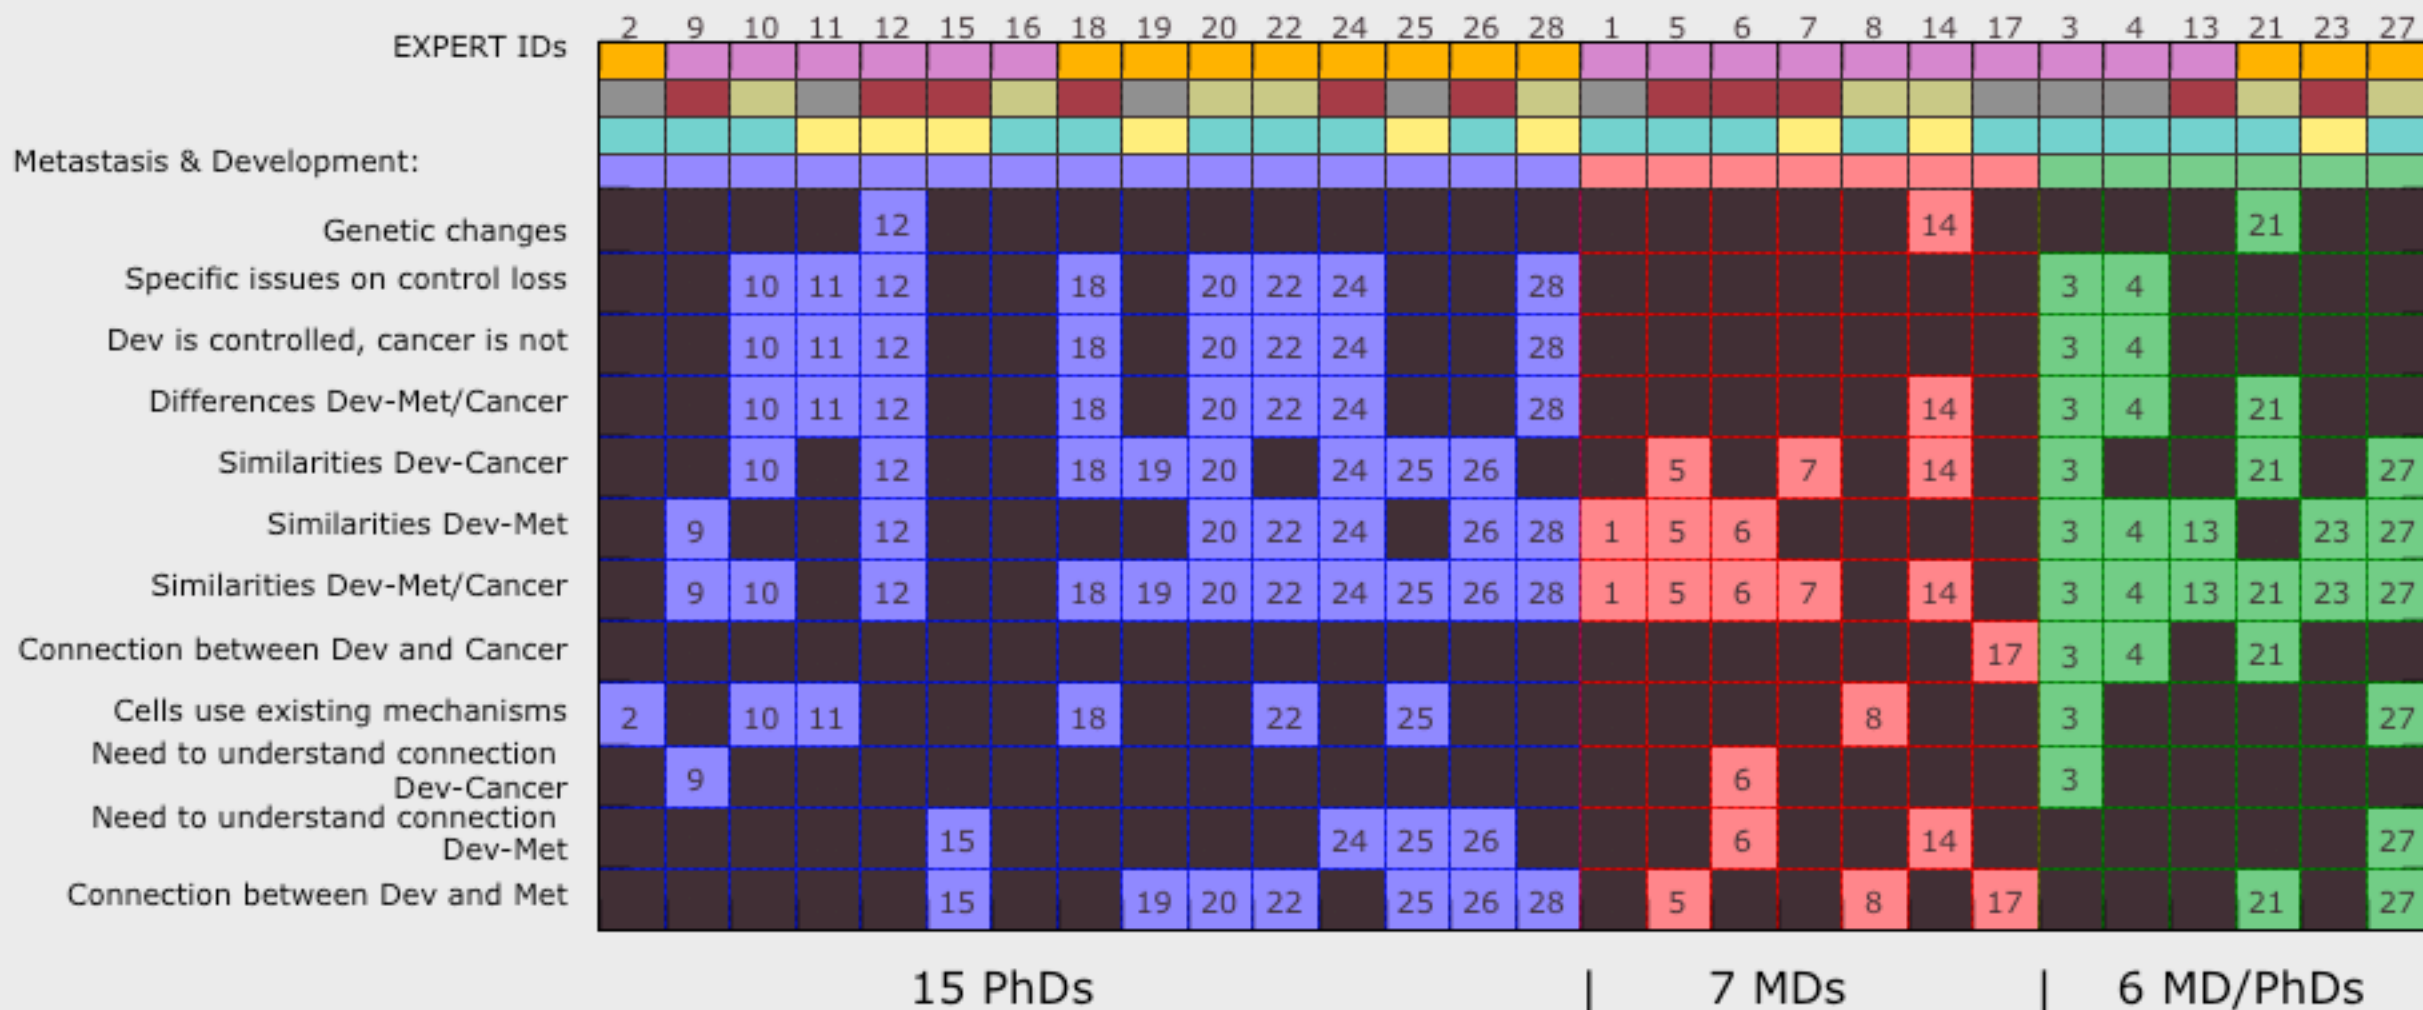

Gender

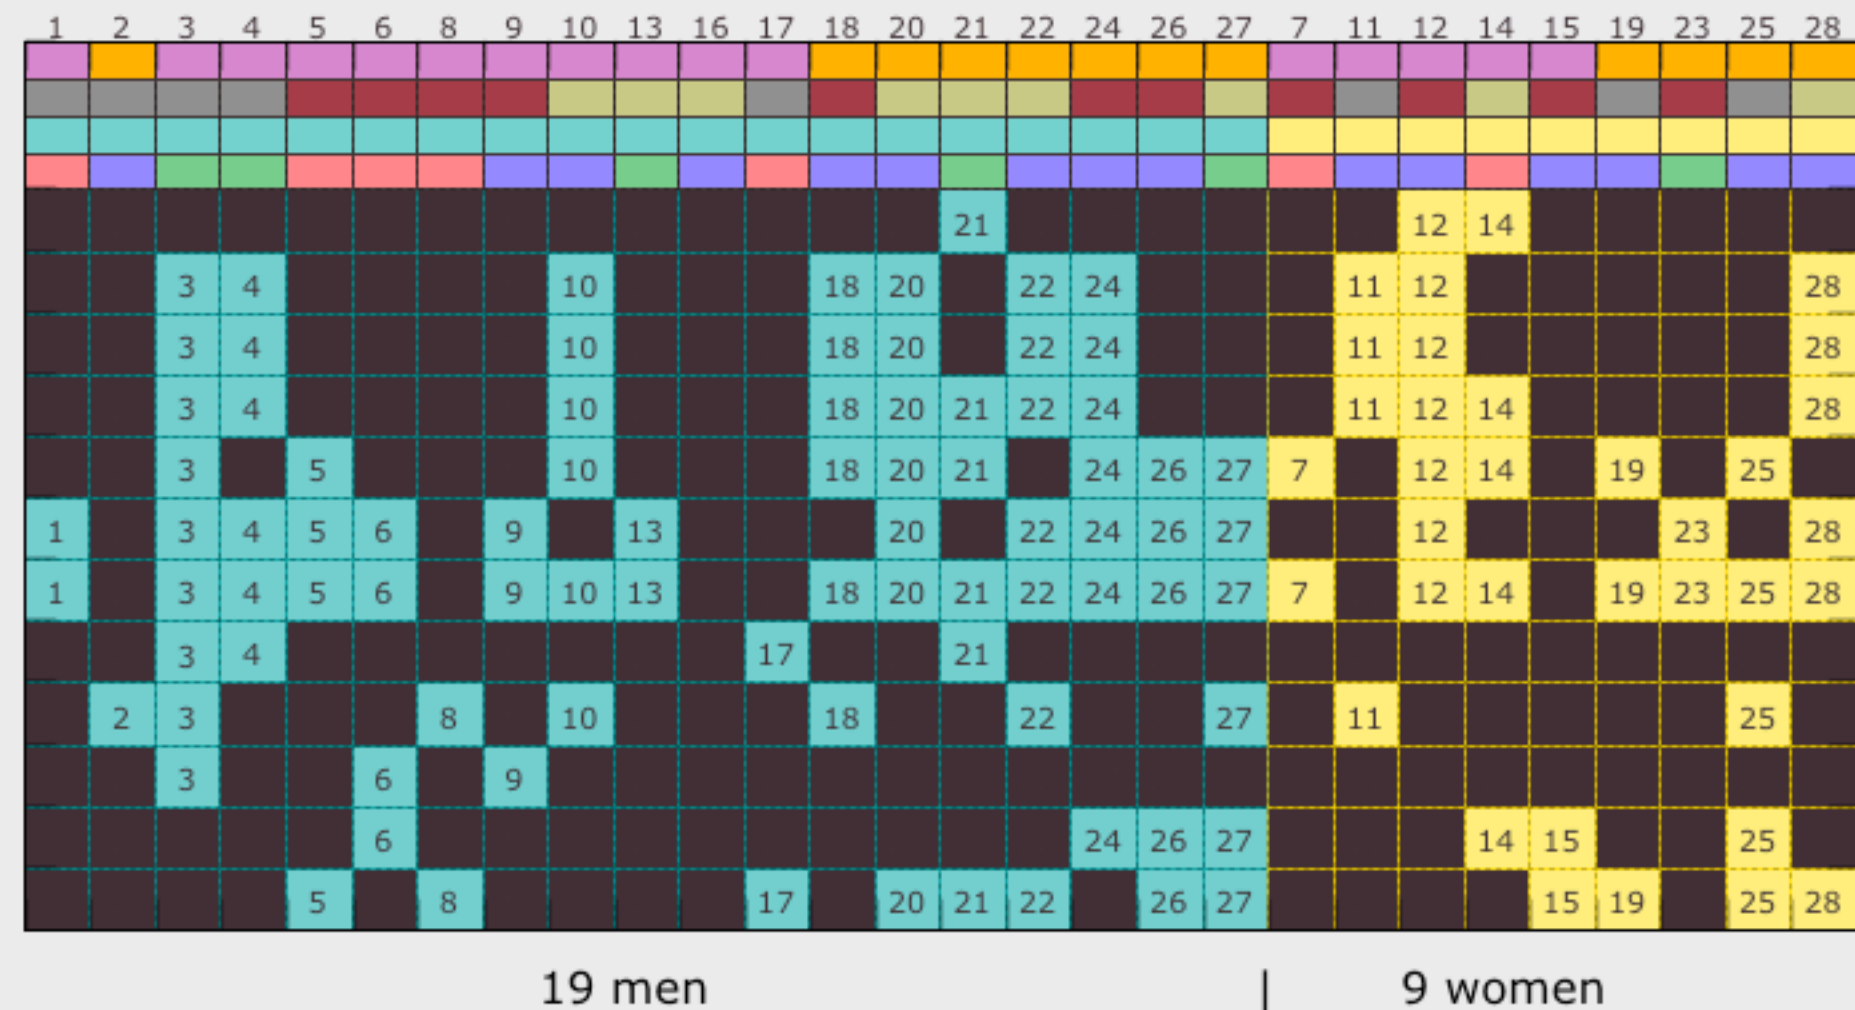

Year they received their first doctoral degree

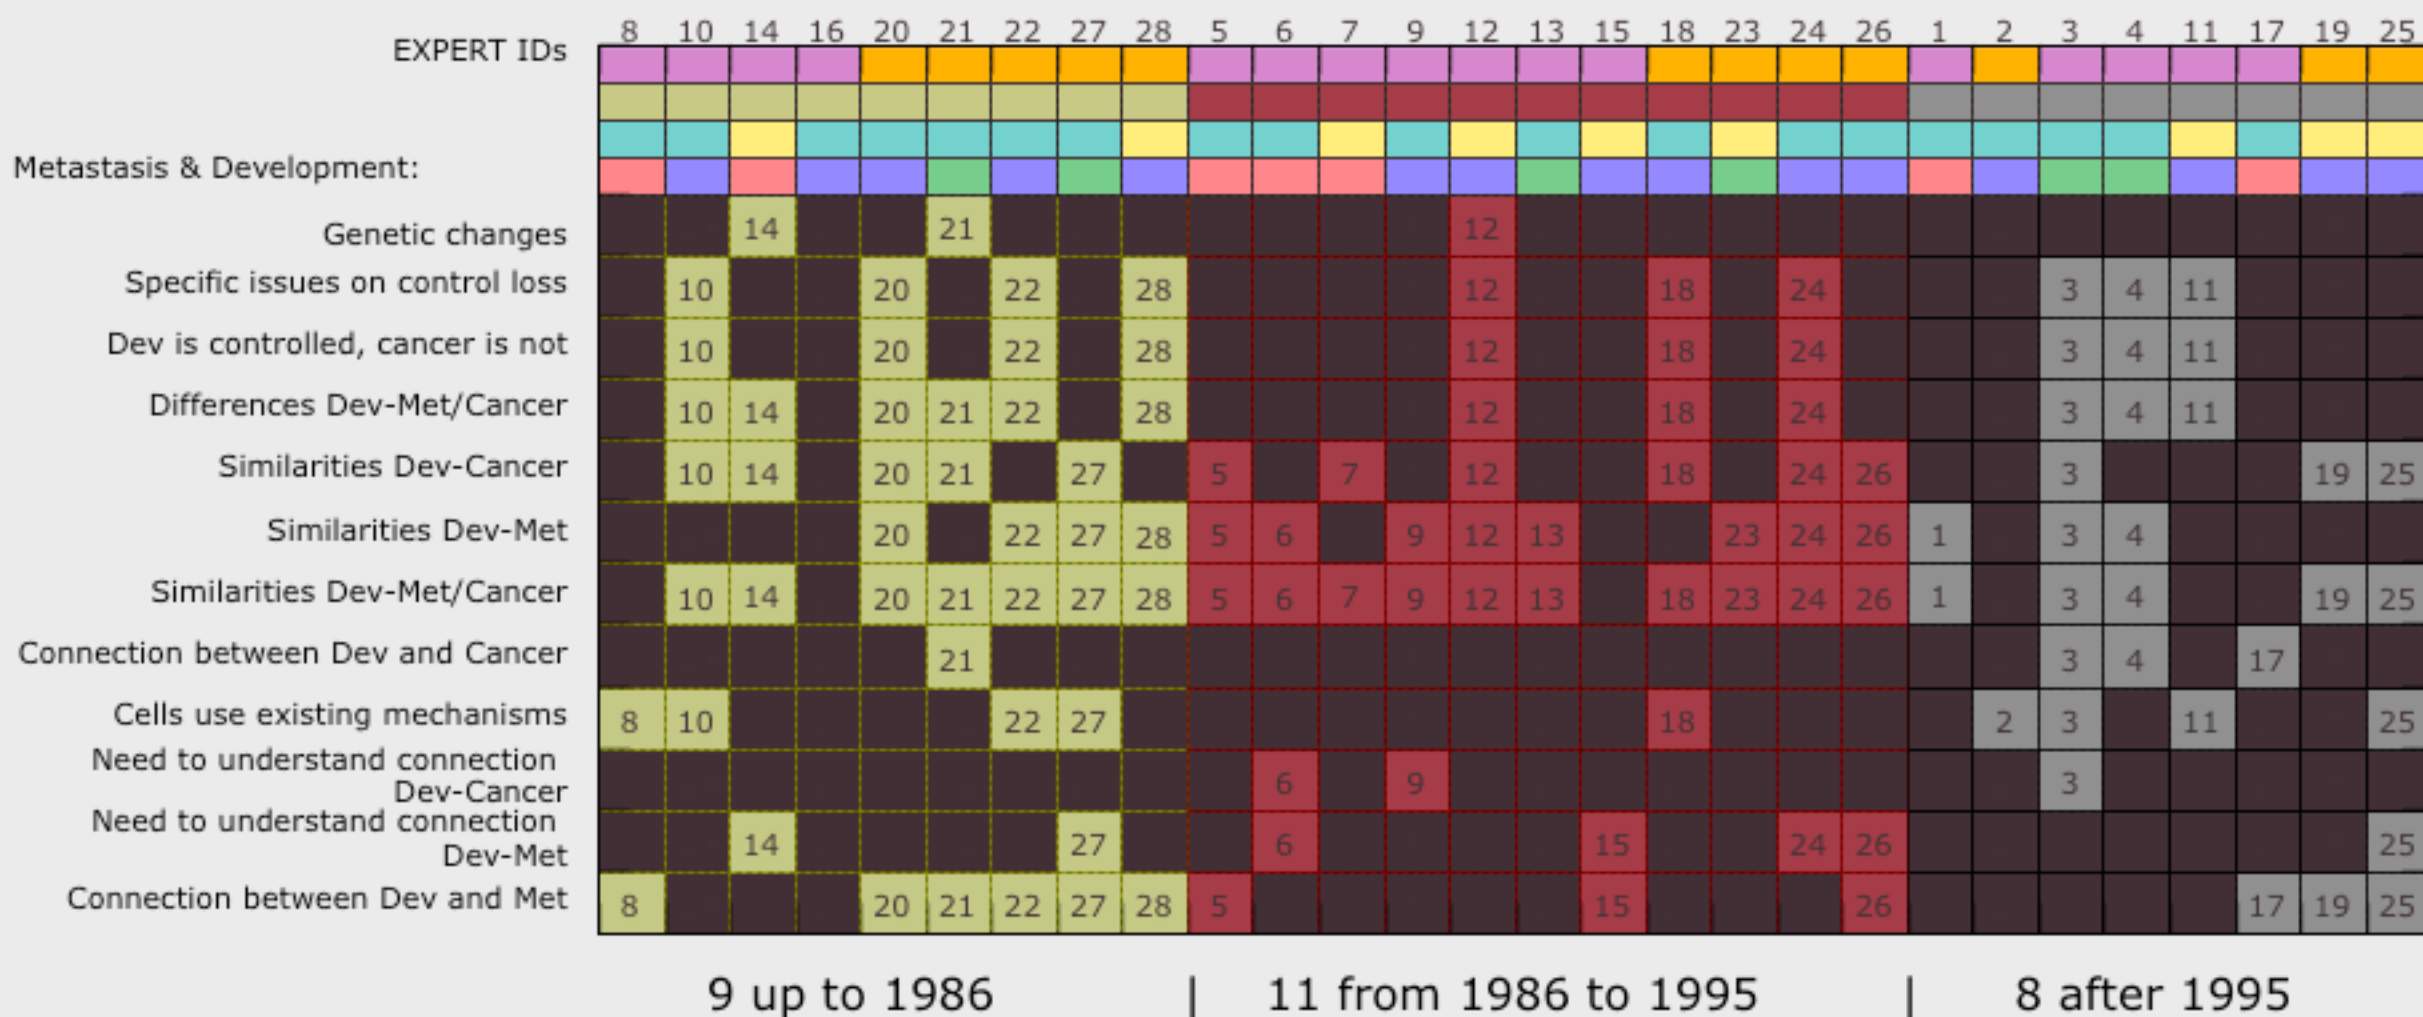

Interview conducted in person or over the phone

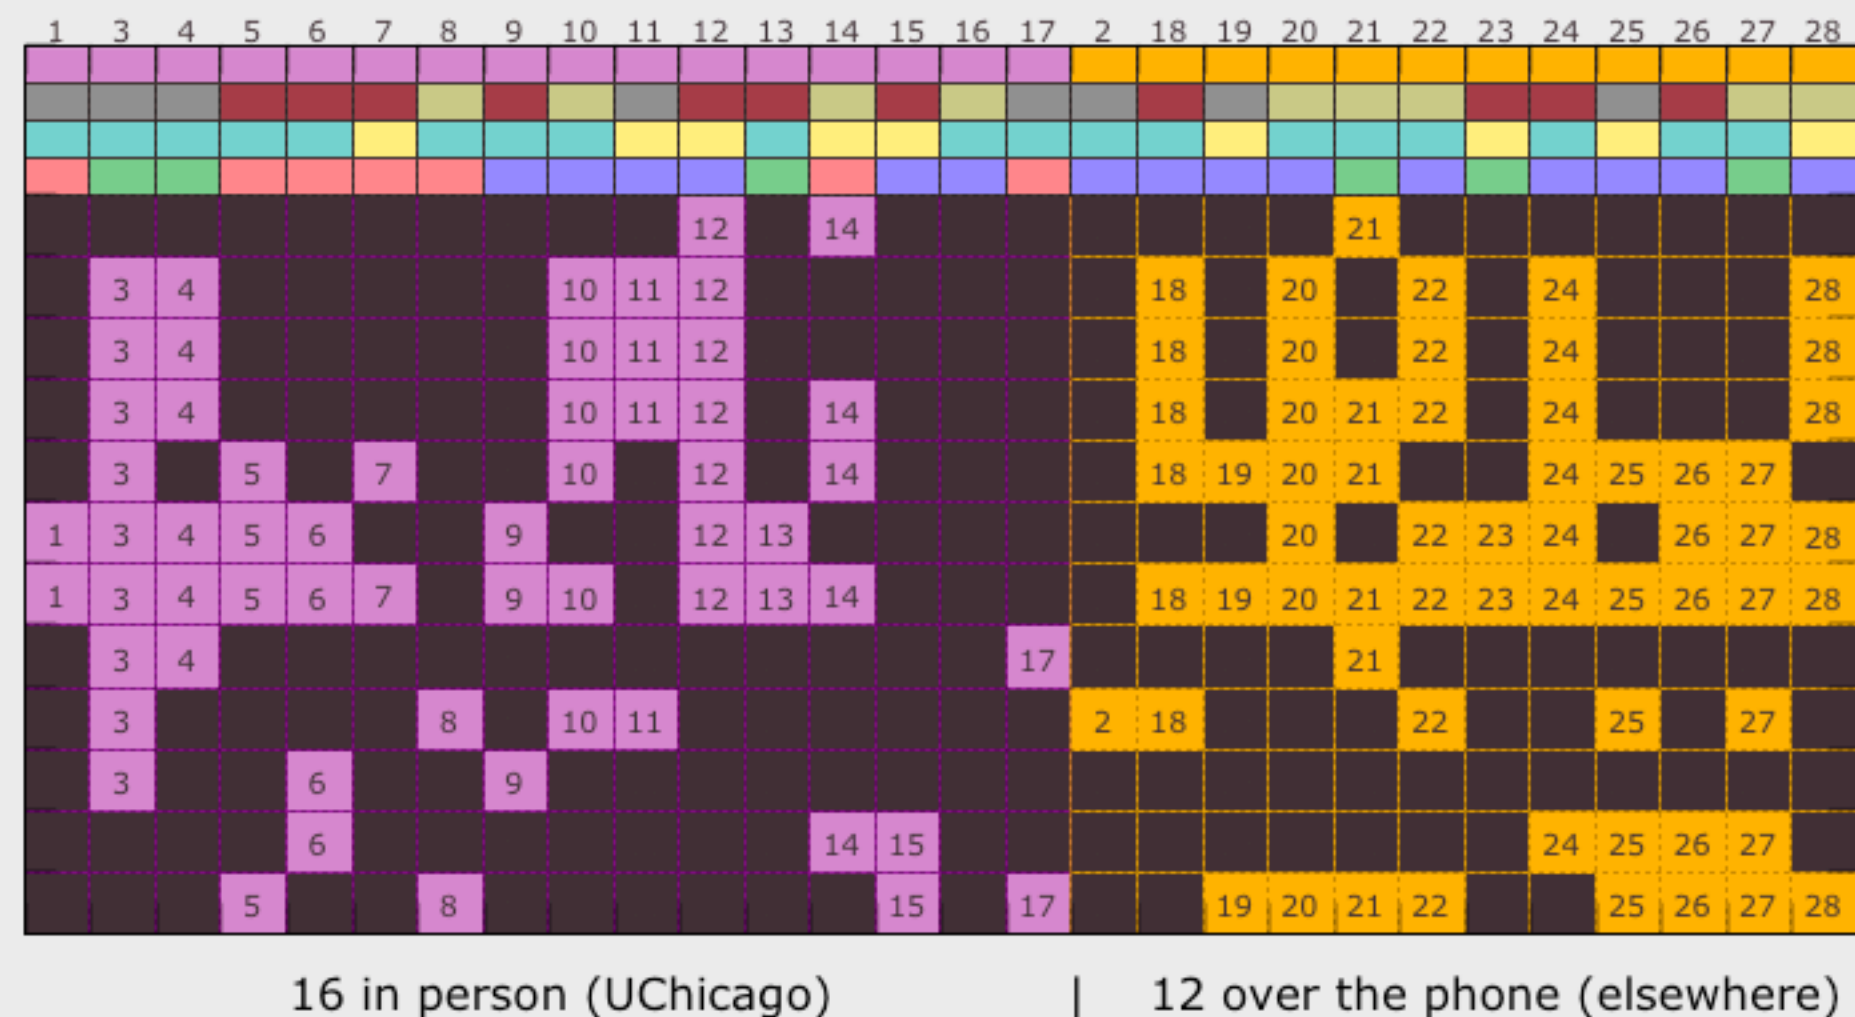

Degree Type (PhD/MD)

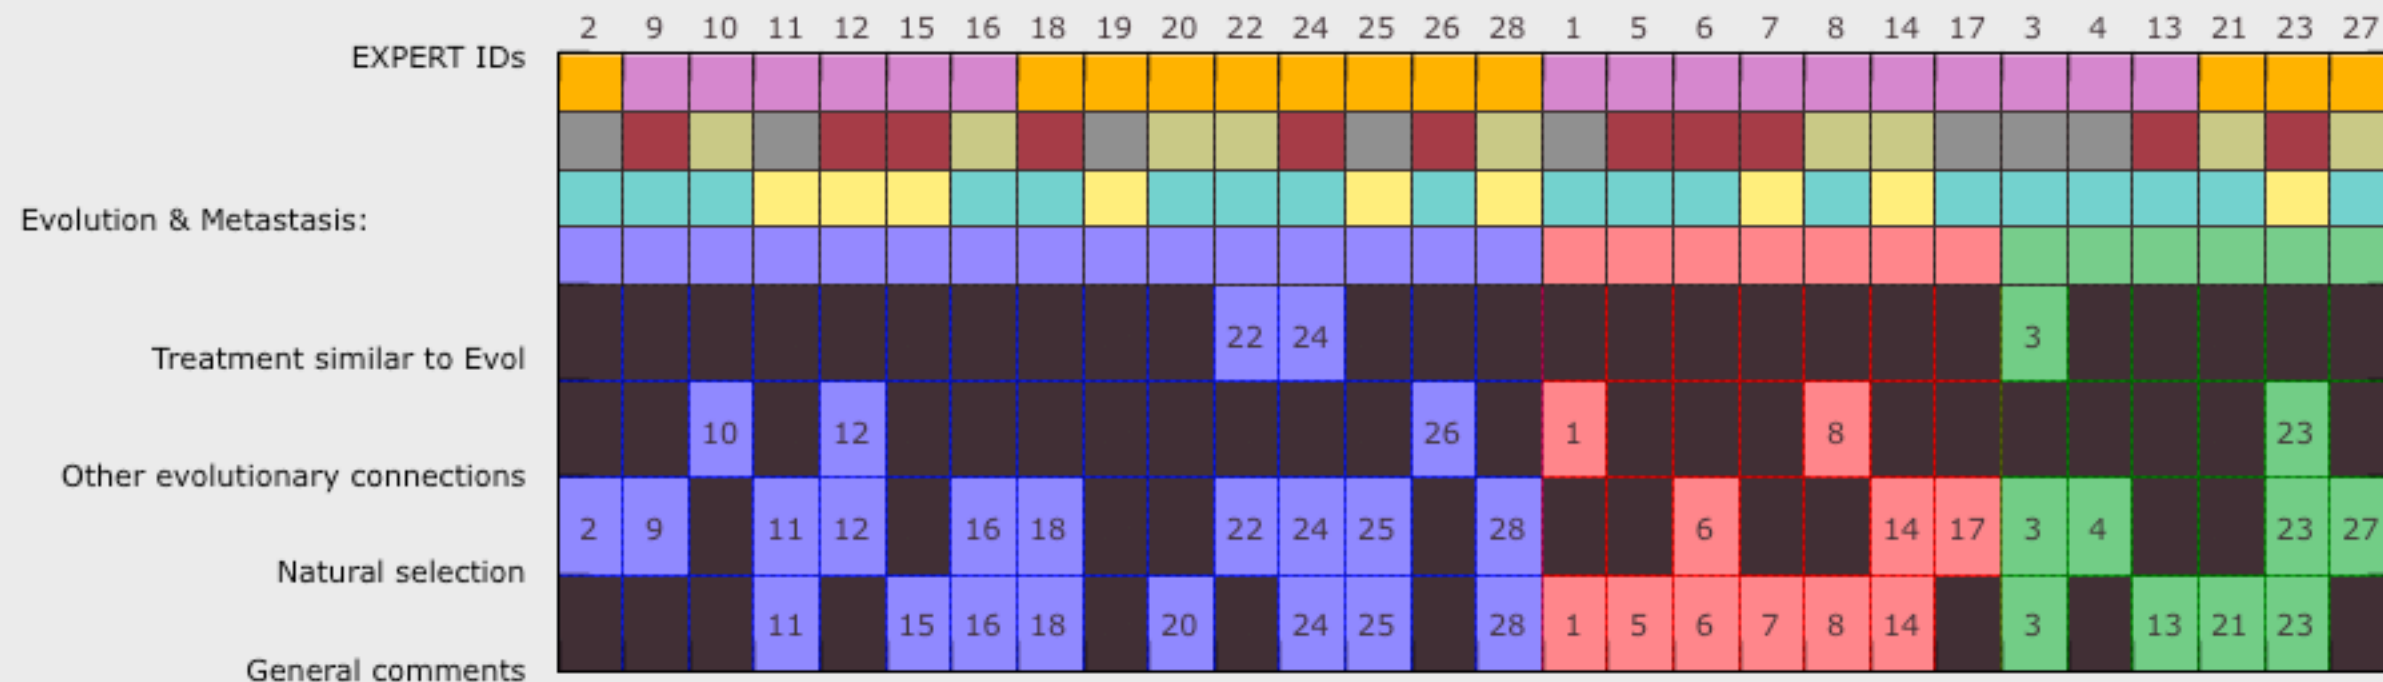

15 PhDs | 7 MDs | 6 MD/PhDs

Year they received their first doctoral degree

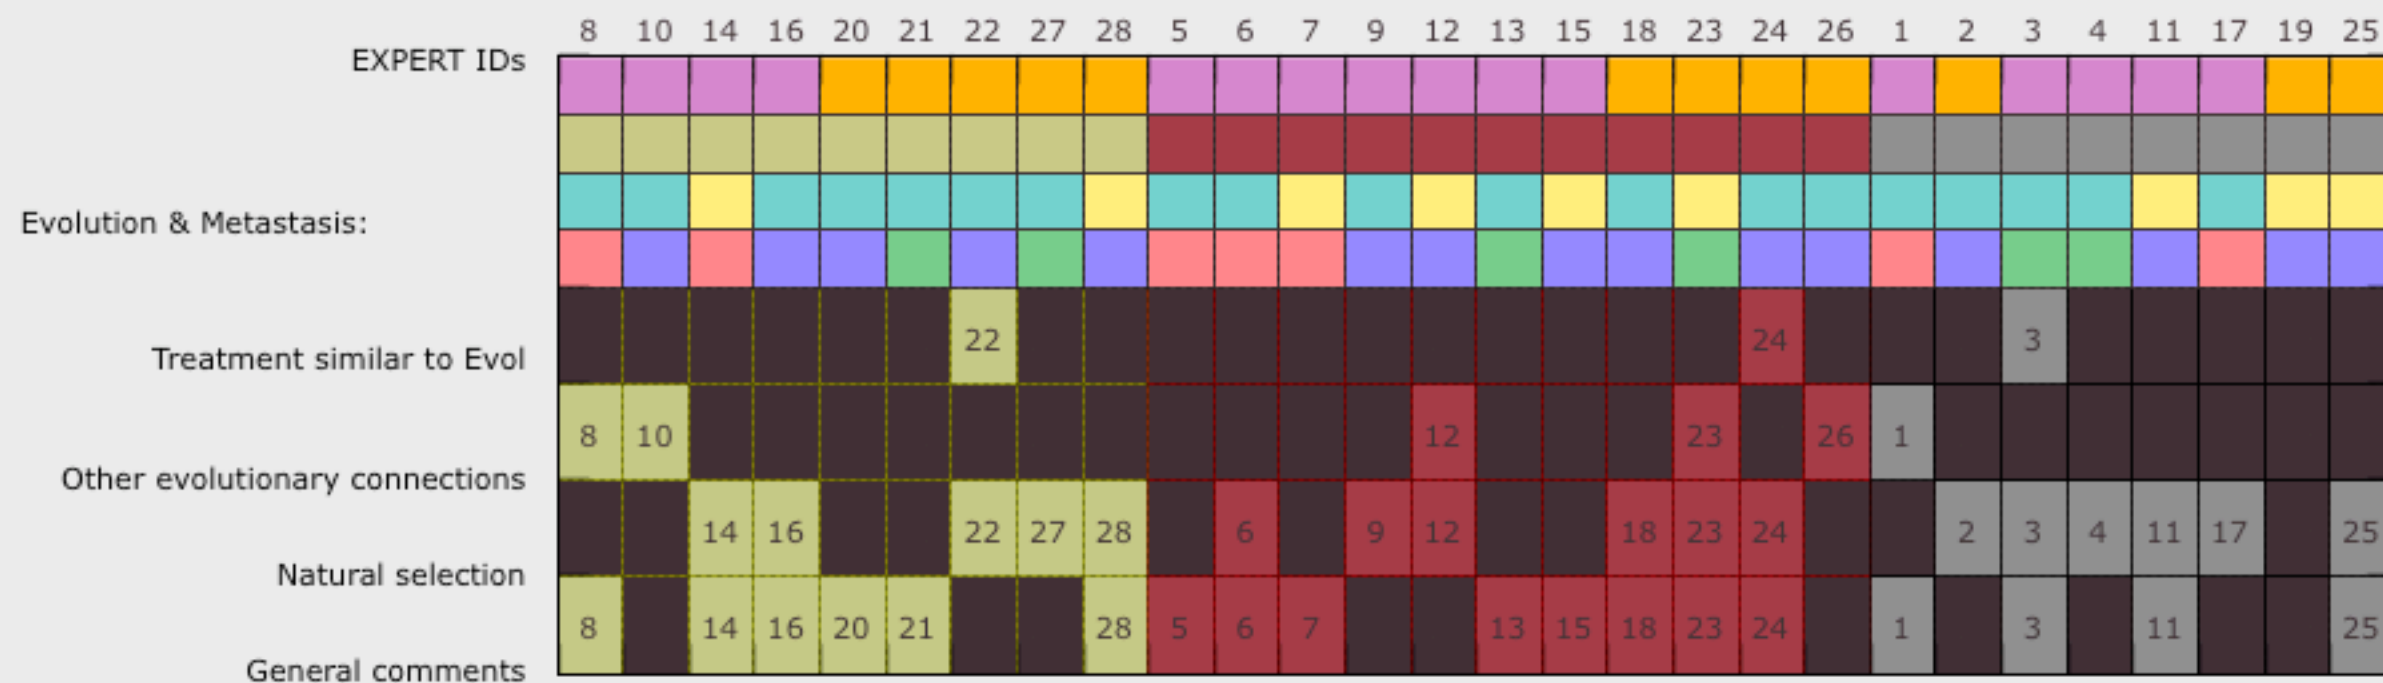

9 up to 1986 | 11 from 1986 to 1995 | 8 after 1995

Gender

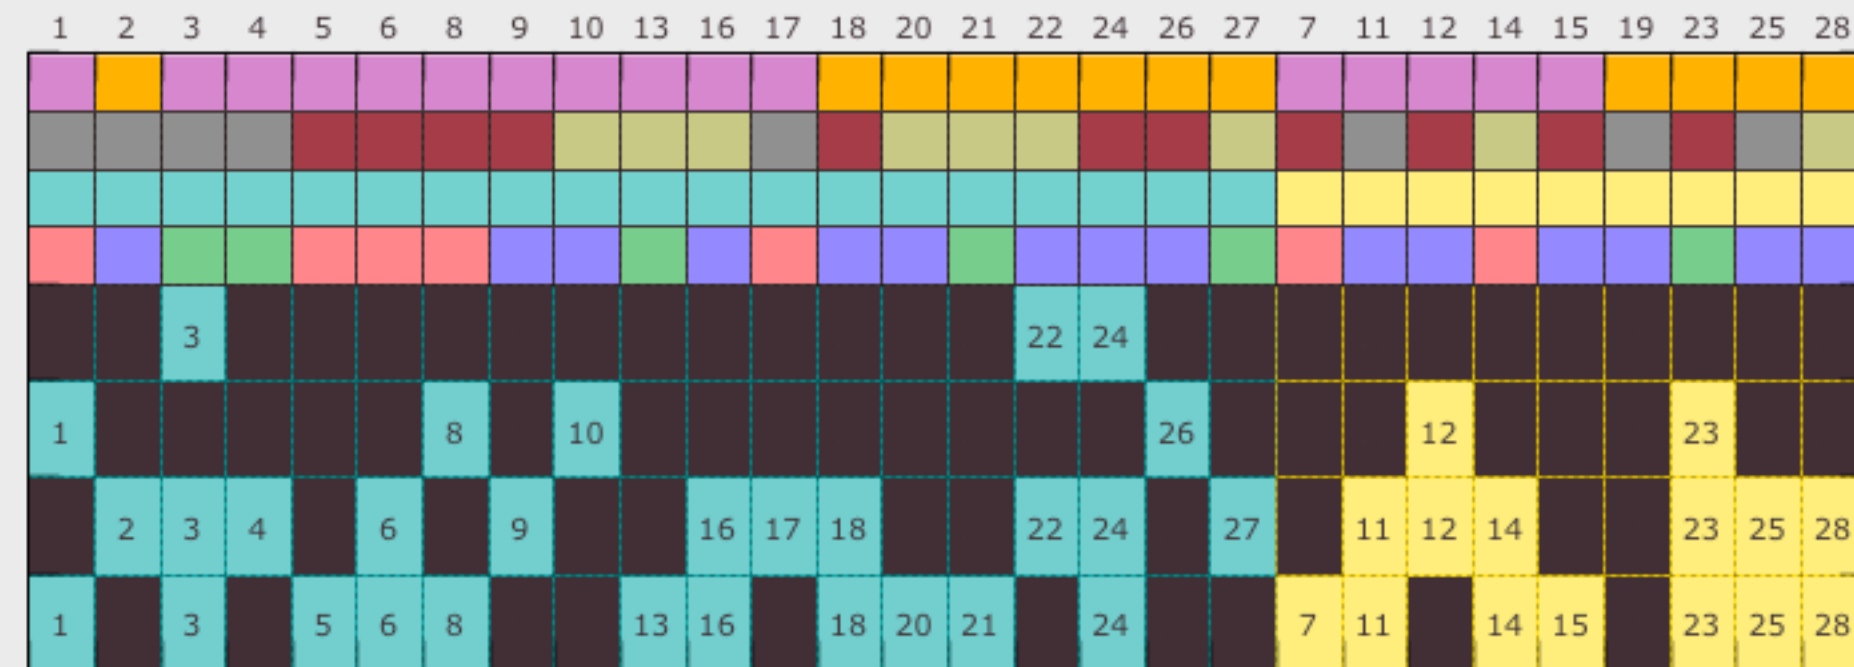

19 men | 9 women

Interview conducted in person or over the phone

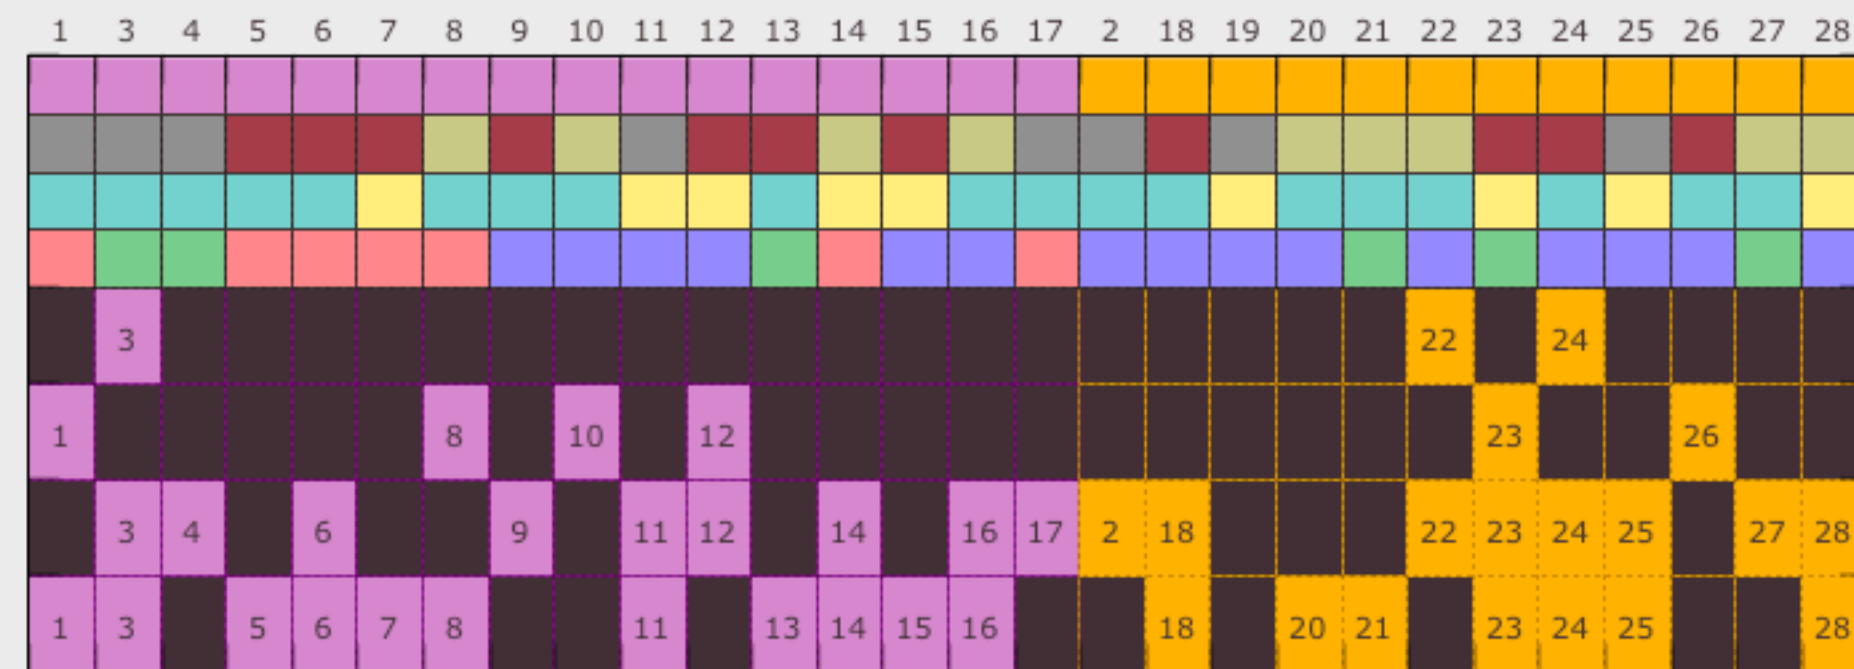

16 in person (UChicago) | 12 over the phone (elsewhere)
